# Supplementary material
Source: PubMed Central journal article supplement (PMC2978778)

# Total Synthesis and Evaluation of Phostriecin and Key Structural Analogues

Christopher P. Burke,<sup>†</sup> Mark R. Swingle,<sup>‡</sup> Richard E. Honkanen,<sup>‡</sup> and Dale L. Boger<sup>\*†</sup>

<sup>†</sup>*Department of Chemistry and the Skaggs Institute for Chemical Biology, The Scripps Research Institute,  
10550 North Torrey Pines Road, La Jolla, California 92037*

<sup>‡</sup>*Department of Biochemistry and Molecular Biology, University of South Alabama College of Medicine, Mobile, Alabama 36688*

*boger@scripps.edu*

## Supporting Information

### Table of Contents

|                                                                                                          |     |
|----------------------------------------------------------------------------------------------------------|-----|
| General Experimental Methods:                                                                            | S2  |
| Synthesis and characterization of compounds <b>1</b> , <b>2</b> , <b>35</b> , <b>36</b> , <b>39–58</b> : | S2  |
| Protocol for phosphatase inhibition assays:                                                              | S22 |
| <sup>1</sup> H, <sup>13</sup> C, and <sup>31</sup> P NMR spectra:                                        | S24 |

**General Experimental Methods.** All reactions were carried out under an inert atmosphere (N<sub>2</sub> or Ar) with dry solvents under anhydrous conditions unless otherwise stated. Dichloromethane, tetrahydrofuran (THF), benzene, and toluene were obtained by passing the solvents through a solvent purification system with activated alumina columns. Diethyl ether (Et<sub>2</sub>O) was dried and distilled from sodium/benzophenone. All commercially available reagents were used without further purification. Thin layer chromatography (TLC) was performed with precoated silica gel 60 plates (0.25 mm) using UV light or an acidic solution of phosphomolybdic acid or ceric ammonium molybdate followed by heating for visualization. Normal phase column chromatography was performed using silica gel 60 (40–63 μm particle size). Reverse phase chromatography was performed using C<sub>18</sub>-functionalized (35–75 μm particle size) silica gel. Unless stated otherwise, solvents were evaporated under reduced pressure on a rotary evaporator. NMR spectra were obtained with spectrometers operating at the indicated frequencies, and the spectra were referenced to TMS (δ 0.00) or residual undeuterated solvent peaks (C<sub>6</sub>D<sub>6</sub>: <sup>1</sup>H = δ 7.15, <sup>13</sup>C = δ 128.02; CD<sub>3</sub>OD: <sup>1</sup>H = δ 3.31, <sup>13</sup>C = δ 49.05; DMSO-*d*<sub>6</sub>: <sup>1</sup>H = δ 2.50 <sup>13</sup>C = δ 39.43; CD<sub>3</sub>CN: <sup>1</sup>H = δ 1.94, <sup>13</sup>C = δ 1.24. All <sup>31</sup>P NMR spectra were referenced to H<sub>3</sub>PO<sub>4</sub> (δ 0.00). IR spectra were recorded on an FT-IR spectrometer as thin films using ATR (attenuated total reflectance). High-resolution mass spectra (HRMS) were obtained on a spectrometer using ESI-TOF (electrospray ionization-time of flight).

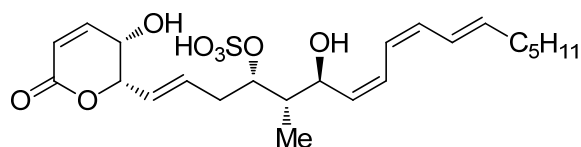

**Sultriecin (1).** A solution of HF–pyridine complex (0.27 mL) in 0.40 mL of THF was added to a solution of **34** (0.0056 g, 0.0059 mmol) in 0.40 mL of THF and 0.10 mL of pyridine with stirring at room temperature. After 96 h, the reaction mixture was carefully transferred to a mixture of saturated aqueous NaHCO<sub>3</sub> (6.3 mL) and EtOAc (2.4 mL). The mixture was extracted with EtOAc (5 × 4 mL), and the combined organic fractions were dried (Na<sub>2</sub>SO<sub>4</sub>) and

concentrated under reduced pressure. The residue was purified by flash chromatography (SiO<sub>2</sub>, 20% MeOH/CH<sub>2</sub>Cl<sub>2</sub>) to give 0.0017 g (60%) of sultricin (**1**) as a white solid:  $[\alpha]_D^{25} +9.0$  (c 0.20, MeOH); <sup>1</sup>H NMR (CD<sub>3</sub>OD, 600 MHz)  $\delta$  7.03 (dd, *J* = 9.6, 5.4 Hz, 1H), 6.59 (t, *J* = 12.0 Hz, 1H), 6.54 (dd, *J* = 14.4, 12.0 Hz, 1H), 6.21 (t, *J* = 12.0 Hz, 1H), 6.05 (d, *J* = 9.6 Hz, 1H), 6.02 (t, *J* = 12.0 Hz, 1H), 5.91 (dt, *J* = 15.6, 7.8 Hz, 1H), 5.83 (dd, *J* = 15.6, 7.2 Hz, 1H), 5.76 (dt, *J* = 14.4, 7.2 Hz, 1H), 5.38 (dd, *J* = 10.8, 9.6 Hz, 1H), 4.82 (ddd, *J* = 8.4, 6.6, 2.4 Hz, 1H), 4.61 (t, *J* = 9.6 Hz, 1H), 4.17 (dd, *J* = 5.4, 3.0 Hz, 1H), 2.80–2.74 (m, 1H), 2.50–2.43 (m, 1H), 2.13 (q, *J* = 7.2 Hz, 2H), 1.67–1.63 (m, 1H), 1.46–1.39 (m, 2H), 1.37–1.24 (m, 4H), 0.90 (t, *J* = 7.2 Hz, 3H), 0.83 (d, *J* = 7.2 Hz, 3H); <sup>1</sup>H NMR (DMSO-*d*<sub>6</sub>, 600 MHz)  $\delta$  7.00 (dd, *J* = 9.6, 5.4 Hz, 1H), 6.56 (dd, *J* = 14.4, 10.8 Hz, 1H), 6.51 (t, *J* = 11.4 Hz, 1H), 6.09 (t, *J* = 10.8 Hz, 1H), 6.01 (t, *J* = 10.8 Hz, 1H), 5.98 (d, *J* = 9.6 Hz, 1H), 5.81–5.68 (m, 3H), 5.35 (t, *J* = 10.2 Hz, 1H), 4.97 (d, *J* = 4.2 Hz, 1H), 4.82 (dd, *J* = 6.6, 3.0 Hz, 1H), 4.51(ddd, *J* = 7.8, 5.4, 2.4 Hz, 1H), 4.32 (td, *J* = 9.0, 4.2 Hz, 1H), 4.15–4.09 (m, 1H), 4.08–4.04 (m, 1H), 2.63–2.57 (m, 1H), 2.32–2.26 (m, 1H), 2.11 (q, *J* = 7.2 Hz, 2H), 2.02–1.96 (m, 1H), 1.48–1.20 (m, 6H), 0.86 (t, *J* = 7.2 Hz, 3H), 0.66 (d, *J* = 7.2 Hz, 3H); <sup>13</sup>C NMR (DMSO-*d*<sub>6</sub>, 150 MHz)  $\delta$  176.1, 163.3, 146.6, 136.8, 134.1, 131.3, 126.8, 125.5, 124.0, 122.3, 121.1, 80.9, 73.7, 66.9, 61.6, 41.2, 35.4, 32.2, 30.8, 28.3, 21.9, 13.9, 8.8; IR (film)  $\nu_{\max}$  3426, 1720, 1253, 1042, 945 cm<sup>-1</sup>; HRMS (ESI-TOF) calcd for C<sub>23</sub>H<sub>34</sub>O<sub>8</sub>S – H<sup>+</sup> 469.1902; found 469.1887.

Purification of **1** by reverse phase C<sub>18</sub> silica gel chromatography (H<sub>2</sub>O/MeCN eluent), which does not affect counterion identity or protonation state, resulted in **1** identical spectroscopically to the product obtained from normal phase silica gel chromatography. Passing the material through a column of Dowex-Na<sup>+</sup> resin also yielded **1** with identical spectroscopic characterization.

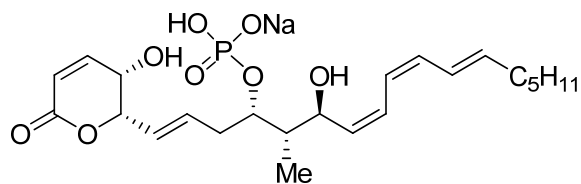

**Phostriecin (2).** HF-pyr (0.38 mL) in 0.57 mL of THF was added at room temperature to a solution of **37** (11.2 mg, 0.00859 mmol) in THF (0.57 mL) and pyridine (0.14 mL) and was stirred for 4 d in the dark. The reaction mixture was carefully transferred to a gently stirred mixture of saturated aqueous NaHCO<sub>3</sub> (9 mL) and EtOAc (3.5 mL) and was stirred until CO<sub>2</sub> evolution ceased. The phases were separated, and the aqueous phase was extracted with EtOAc (5 × 6 mL). The combined organic extracts were dried (Na<sub>2</sub>SO<sub>4</sub>) and concentrated under vacuum. The crude residue of **38** was dissolved in MeCN (1.6 mL), and Et<sub>3</sub>N (0.45 mL) was added at room temperature. The mixture was stirred overnight before toluene (1.9 mL) was added, and the mixture was concentrated under a stream of N<sub>2</sub>. H<sub>2</sub>O (2.7 mL) was added to the residue, and the mixture was washed with hexanes (5 × 3 mL). The aqueous layer was concentrated under reduced pressure, and the residue was dissolved in 1:1 MeCN/H<sub>2</sub>O and passed through a short column of Dowex-Na<sup>+</sup> (2 cm × 1 cm, 1:1 MeCN/H<sub>2</sub>O eluent). The product-containing fractions were then concentrated under reduced pressure (the H<sub>2</sub>O was azeotoped with MeCN), and the remaining residue was further purified by flash column chromatography (C<sub>18</sub> reverse phase SiO<sub>2</sub>, 0–10% MeCN/H<sub>2</sub>O gradient) to give 2.67 mg (63%) of **2** as a white solid:  $[\alpha]_D^{25} +21$  (*c* 0.12, MeOH; lit.  $[\alpha]_D^{24} +23$  (*c* 1.0, MeOH))<sup>1</sup>; <sup>1</sup>H NMR (CD<sub>3</sub>OD, 600 MHz)  $\delta$  7.04 (dd, *J* = 9.6, 5.4 Hz, 1H), 6.60 (t, *J* = 11.4 Hz, 1H), 6.55 (dd, *J* = 15.0, 11.4 Hz, 1H), 6.25 (t, *J* = 11.4 Hz, 1H), 6.06 (d, *J* = 9.6 Hz, 1H), 6.01 (t, *J* = 11.4 Hz, 1H),

<sup>1</sup> Ohkuma, H.; Naruse, N.; Nishiyama, Y.; Tsuno, T.; Hoshino, Y.; Sawada, Y.; Konishi, M.; Oki, T. *J. Antibiot.* **1992**, *45*, 1239.

5.93 (dt,  $J = 15.6, 7.2$  Hz, 1H), 5.82 (dd,  $J = 15.6, 7.2$  Hz, 1H), 5.76 (dt,  $J = 15.0, 7.2$  Hz, 1H), 5.39 (dd,  $J = 10.8, 9.6$  Hz, 1H), 4.86 (m, 1H), 4.64 (dddd,  $J = 9.6, 7.8, 7.2, 1.8$  Hz, 1H), 4.58 (t,  $J = 9.6$  Hz, 1H), 4.20 (dd,  $J = 5.4, 3.0$  Hz, 1H), 2.67–2.59 (m, 1H), 2.40–2.32 (m, 1H), 2.14 (q,  $J = 7.2$  Hz, 1H), 1.57–1.51 (m, 1H), 1.45–1.25 (m, 6H), 0.91 (t,  $J = 7.2$  Hz, 3H), 0.82 (d,  $J = 7.2$  Hz, 3H);  $^1\text{H}$  NMR (DMSO- $d_6$ , 600 MHz)  $\delta$  6.98 (dd,  $J = 9.6, 5.4$  Hz, 1H), 6.55 (dd,  $J = 14.4, 11.1$  Hz, 1H), 6.47 (t,  $J = 11.4$  Hz, 1H), 6.14 (t,  $J = 11.4$  Hz, 1H), 5.98 (t,  $J = 11.1$  Hz, 1H), 5.95 (d,  $J = 9.6$  Hz, 1H), 5.80–5.72 (m, 2H), 5.63 (dd,  $J = 15.6, 7.2$  Hz, 1H), 5.34 (t,  $J = 10.2$  Hz, 1H), 4.79 (dd,  $J = 7.2, 3.0$  Hz, 1H), 4.49–4.39 (m, 1H), 4.28 (t,  $J = 9.6$  Hz, 1H), 4.08 (dd,  $J = 6.0, 3.0$  Hz, 1H), 2.35–2.26 (m, 1H), 2.12–2.04 (m, 3H), 1.40–1.32 (m, 2H), 1.32–1.16 (m, 5H), 0.86 (t,  $J = 6.6$  Hz, 3H), 0.63 (d,  $J = 6.6$  Hz, 3H);  $^{13}\text{C}$  NMR (CD $_3$ OD, 150 MHz)  $\delta$  166.3, 147.4, 138.0, 133.77, 133.75, 132.0, 127.9, 126.8, 126.6, 123.6, 122.7, 83.4, 74.21, 74.17, 68.8, 63.7, 44.44, 44.41, 38.2, 34.0, 32.7, 30.2, 23.6, 14.4, 9.2;  $^{31}\text{P}$  NMR (CD $_3$ OD, 160 MHz)  $\delta$  3.4 (3.4–4.0, condition dependent); IR (film)  $\nu_{\text{max}}$  3414, 1719, 1662, 1088  $\text{cm}^{-1}$ ; HRMS (ESI-TOF) calcd for C $_{23}$ H $_{35}$ O $_8$ P + Na $^+$  493.1962; found 493.1966.

Experimental details for the preparation and characterization of compounds **8–10**, **12–15**, **19–34**, and **37** may be found in ref. 11.

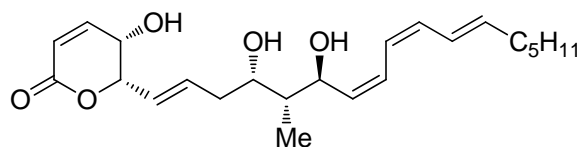

**(5S,6S)-6-((1E,4S,5R,6S,7Z,9Z,11E)-4,6-Dihydroxy-5-methylheptadeca-1,7,9,11-tetraen-1-yl)-5-hydroxy-5,6-dihydro-2H-pyran-2-one (35)**. A solution of HF–pyr (0.10 mL) in 0.20 mL of THF was added to a solution of **33** (2.7 mg, 0.003 mmol) in THF (0.20 mL) and pyridine

(0.05 mL) at room temperature with stirring. After stirring for 12 h, the mixture was carefully transferred a mixture of saturated aq. NaHCO<sub>3</sub> (3 mL) and EtOAc (2 mL). The mixture was extracted with EtOAc, and the combined organic fractions were washed with saturated aq. NaHCO<sub>3</sub>, dried (Na<sub>2</sub>SO<sub>4</sub>), and concentrated. The residue was purified by flash chromatography (SiO<sub>2</sub>, 9:1 CH<sub>2</sub>Cl<sub>2</sub>/MeOH) to give 1.05 mg (90%) of the product as a colorless oil:  $[\alpha]_D^{25} -62$  (c 0.05, MeOH); <sup>1</sup>H NMR (CD<sub>3</sub>OD, 600 MHz)  $\delta$  7.05 (dd,  $J = 9.6, 5.4$  Hz, 1H), 6.59 (t,  $J = 10.8$  Hz, 1H), 6.58–6.52 (m, 1H), 6.19 (t,  $J = 11.4$  Hz, 1H), 6.07 (d,  $J = 10.2$  Hz, 1H), 6.03 (t,  $J = 10.8$  Hz, 1H), 5.97 (dt,  $J = 15.6, 6.6$  Hz, 1H), 5.85–5.75 (m, 2H), 5.42 (t,  $J = 9.6$  Hz, 1H), 4.87–4.85 (m, 1H), 4.56 (t,  $J = 9.0$  Hz, 1H), 4.16 (dd,  $J = 5.4, 3.0$  Hz, 1H), 4.10 (ddd,  $J = 8.4, 5.4, 2.4$  Hz, 1H), 2.42–2.35 (m, 1H), 2.32–2.25 (m, 1H), 2.15 (q,  $J = 7.2$  Hz, 2H), 1.62–1.53 (m, 1H), 1.46–1.38 (m, 2H), 1.38–1.26 (m, 6H), 0.91 (t,  $J = 7.2$  Hz, 3H), 0.82 (d,  $J = 7.2$  Hz, 3H); <sup>1</sup>H NMR (DMSO-*d*<sub>6</sub>, 600 MHz)  $\delta$  7.00 (dd,  $J = 9.6, 5.4$  Hz, 1H), 6.56 (dd,  $J = 14.4, 12.0$  Hz, 1H), 6.49 (t,  $J = 11.4$  Hz, 1H), 6.14 (t,  $J = 11.4$  Hz, 1H), 6.00 (m, 1H), 5.99 (d,  $J = 9.6$  Hz, 1H), 5.86 (dt,  $J = 15.6, 7.2$  Hz, 1H), 5.77 (dt,  $J = 14.4, 7.2$  Hz, 1H), 5.69 (dd,  $J = 15.6, 7.8$  Hz, 1H), 5.58–5.48 (brs, 1H), 5.37 (t,  $J = 10.8$  Hz, 1H), 4.82 (dd,  $J = 7.2, 3.0$  Hz, 1H), 4.77–4.69 (brs, 1H), 4.35 (m, 1H), 4.04 (m, 1H), 3.94 (m, 1H), 2.25–2.18 (m, 1H), 2.15–2.04 (m, 3H), 1.41–1.32 (m, 3H), 1.32–1.19 (m, 6H), 0.86 (t,  $J = 6.6$  Hz, 3H), 0.66 (d,  $J = 7.2$  Hz, 3H); <sup>13</sup>C NMR (CD<sub>3</sub>OD, 150 MHz)  $\delta$  166.1, 147.3, 138.3, 134.8, 134.2, 132.3, 127.3, 126.7, 126.2, 123.0, 122.7, 83.2, 71.1, 69.6, 63.8, 44.4, 39.1, 34.0, 32.7, 30.2, 23.6, 14.4, 9.8; IR (film)  $\nu_{\max}$  3367, 1715, 1034 cm<sup>-1</sup>; HRMS (ESI-TOF) calcd for C<sub>23</sub>H<sub>34</sub>O<sub>5</sub> + Na<sup>+</sup> 413.2298; found 413.2298.

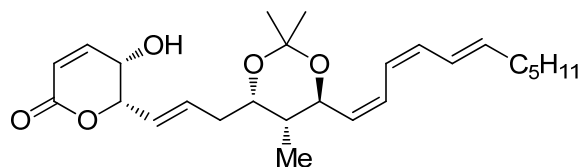

**(5*S*,6*S*)-5-Hydroxy-6-((*E*)-3-((4*S*,5*R*,6*S*)-2,2,5-trimethyl-6-((1*Z*,3*Z*,5*E*)-undeca-1,3,5-trien-1-yl)-1,3-dioxan-4-yl)prop-1-en-1-yl)-5,6-dihydro-2*H*-pyran-2-one (36).** *p*-TsOH/H<sub>2</sub>O (0.15

mg, 0.8 μmol) was added to a solution of **35** (1.0 mg, 0.0027 mmol) and 2,2-dimethoxypropane (0.016 g, 0.15 mmol) in THF (0.63 mL) at room temperature with stirring. After 45 min, 3 drops

of Et<sub>3</sub>N were added, and the reaction mixture was concentrated. The residue was then purified

by flash chromatography (SiO<sub>2</sub> pretreated with 2% Et<sub>3</sub>N/hexanes; 50–60% EtOAc/hexanes gradient) to give 0.60 mg (52%) of the product as a colorless gum:  $[\alpha]_D^{25} +53$  (*c* 0.03, MeOH);

<sup>1</sup>H NMR (CD<sub>3</sub>CN, 600 MHz)  $\delta$  6.96 (dd, *J* = 9.9, 5.4 Hz, 1H), 6.60 (t, *J* = 10.8 Hz, 1H), 6.57

(dd, *J* = 15.0, 10.2 Hz, 1H), 6.22 (t, *J* = 10.8 Hz, 1H), 6.06 (t, *J* = 11.4 Hz, 1H), 6.00 (d, *J* = 9.9

Hz, 1H), 5.92–5.75 (m, 3H), 5.45 (dd, *J* = 8.7, 10.8 Hz, 1H), 4.80 (dd, *J* = 7.2, 3.0 Hz, 1H), 4.29

(t, *J* = 8.7 Hz, 1H), 4.14–4.09 (m, 1H), 4.00 (dt, *J* = 7.8, 6.0 Hz, 1H), 2.25–2.20 (m, 1H), 1.45–

1.38 (m, 1H), 1.36–1.21 (m, 8H), 1.34 (s, 3H), 1.29 (s, 3H), 0.89 (t, *J* = 7.2 Hz, 3H), 0.82 (d, *J* =

7.2 Hz, 3H); <sup>13</sup>C NMR (CD<sub>3</sub>CN, 150 MHz)  $\delta$  177.5, 146.5, 138.8, 133.8, 132.4, 131.6, 126.9,

126.6, 126.2, 122.7, 122.6, 101.3, 82.0, 71.2, 69.5, 63.4, 41.1, 34.4, 33.4, 32.1, 29.5, 25.0, 24.6,

23.1, 14.2, 11.4; IR (film)  $\nu_{\max}$  3390, 1726 cm<sup>-1</sup>; HRMS (ESI-TOF) calcd for C<sub>26</sub>H<sub>38</sub>O<sub>5</sub> + Na<sup>+</sup>

453.2611; found 453.2609.

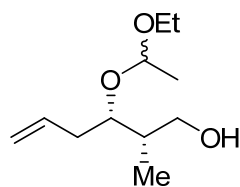

**(2*S*,3*S*)-3-(1-Ethoxyethoxy)-2-methylhex-5-en-1-ol (39).** H<sub>2</sub>O (4.2 mL) and DDQ (1.1 g, 4.9 mmol) were added to a solution of **14** (0.51 g, 1.6 mmol) in CH<sub>2</sub>Cl<sub>2</sub> (74 mL) at 0 °C with stirring. After 1 h, saturated aqueous NaHCO<sub>3</sub> was added and the aqueous phase was extracted with CH<sub>2</sub>Cl<sub>2</sub>. The combined organic phases were washed with H<sub>2</sub>O, saturated aqueous NaCl, dried (Na<sub>2</sub>SO<sub>4</sub>), and concentrated. The residue was purified by flash chromatography (SiO<sub>2</sub> pretreated with 2% Et<sub>3</sub>N/hexanes, 5–20% EtOAc/hexanes gradient) to provide **39a** (0.095 g, 30%) as a colorless oil, and **39b** (0.091 g, 28%) as a colorless oil. Data for **39a**:  $[\alpha]_D^{25} +76$  (*c* 0.39, CHCl<sub>3</sub>); <sup>1</sup>H NMR (C<sub>6</sub>D<sub>6</sub>, 500 MHz)  $\delta$  5.71–5.61 (m, 1H), 5.06–4.95 (m, 2H), 4.45 (q, *J* = 5.0 Hz, 1H), 3.88 (td, *J* = 7.0, 3.0 Hz, 1H), 3.77–3.69 (m, 1H), 3.60–3.53 (m, 1H), 3.19–3.10 (m, 3H), 2.33–2.26 (m, 1H), 2.14–2.06 (m, 1H), 1.84–1.74 (m, 1H), 1.13 (d, *J* = 5.0 Hz, 3H), 1.03 (t, *J* = 7.0 Hz, 3H), 0.82 (t, *J* = 7.0 Hz, 3H); <sup>13</sup>C NMR (C<sub>6</sub>D<sub>6</sub>, 125 MHz)  $\delta$  135.7, 116.9, 100.2, 75.8, 65.2, 61.4, 38.8, 37.4, 20.2, 15.3, 10.1; IR (neat)  $\nu_{\max}$  3435, 1053 cm<sup>-1</sup>; HRMS (ESI-TOF) calcd for C<sub>11</sub>H<sub>22</sub>O<sub>3</sub> + Na<sup>+</sup>: 225.1461; found: 225.1463.

Data for **39b**:  $[\alpha]_D^{25} -4.7$  (*c* 0.47, CHCl<sub>3</sub>); <sup>1</sup>H NMR (C<sub>6</sub>D<sub>6</sub>, 500 MHz)  $\delta$  5.86–5.76 (m, 1H), 5.09–4.97 (m, 2H), 4.62 (q, *J* = 5.5 Hz, 1H), 3.69 (td, *J* = 6.5, 3.0 Hz, 1H), 3.50–3.40 (m, 2H), 3.37–3.28 (m, 2H), 2.48–2.41 (m, 1H), 2.30–2.22 (m, 1H), 1.80–1.70 (m, 1H), 1.45–1.37 (brs, 1H), 1.22 (d, *J* = 5.5 Hz, 3H), 1.09 (t, *J* = 7.0 Hz, 3H), 0.80 (d, *J* = 7.0 Hz, 3H); <sup>13</sup>C NMR (C<sub>6</sub>D<sub>6</sub>, 125 MHz)  $\delta$  136.0, 116.5, 100.1, 77.2, 65.3, 60.3, 38.3, 37.0, 20.4, 15.5, 11.1; IR (neat)  $\nu_{\max}$  3413, 992 cm<sup>-1</sup>; HRMS (ESI-TOF) calcd for C<sub>11</sub>H<sub>22</sub>O<sub>3</sub> + Na<sup>+</sup>: 225.1461; found: 225.1457.



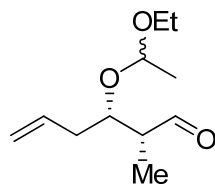

**(2R,3S)-3-(1-Ethoxyethoxy)-2-methylhex-5-enal (40).** Dess–Martin periodinane (0.03 g, 0.08 mmol) was added to a solution of **39a** (0.01 g, 0.05 mmol) in CH<sub>2</sub>Cl<sub>2</sub> (2.4 mL) at room temperature with stirring. After 1 h, saturated aqueous NaHCO<sub>3</sub> (0.5 mL), saturated aqueous Na<sub>2</sub>S<sub>2</sub>O<sub>3</sub> (0.5 mL), and Et<sub>2</sub>O (5 mL) were added and the mixture was stirred vigorously for 15 min. The phases were separated and the aqueous phase was extracted with Et<sub>2</sub>O. The combined organic phases were washed with saturated aqueous NaCl, dried (Na<sub>2</sub>SO<sub>4</sub>), and concentrated. The residue was purified through a short column (SiO<sub>2</sub>, 5% EtOAc/hexanes) to give 0.008 g (80%) of **40a** as a colorless oil:  $[\alpha]_D^{25} +3.7$  (*c* 0.82, CHCl<sub>3</sub>); <sup>1</sup>H NMR (C<sub>6</sub>D<sub>6</sub>, 500 MHz)  $\delta$  9.61 (d, *J* = 0.5 Hz, 1H), 5.60–5.49 (m, 1H), 4.97–4.94 (m, 1H), 4.94–4.91 (m, 1H), 4.52 (q, *J* = 5.0 Hz, 1H), 3.93 (td, *J* = 6.5, 3.5 Hz, 1H), 3.27 (dq, *J* = 9.0, 7.0 Hz, 1H), 3.19 (dq, *J* = 9.0, 7.0 Hz, 1H), 2.26–2.17 (m, 1H), 2.16–2.09 (m, 1H), 2.05–1.98 (m, 1H), 1.12 (d, *J* = 5.0 Hz, 3H), 1.05 (t, *J* = 7.0 Hz, 3H), 1.05 (d, *J* = 7.0 Hz, 3H); <sup>13</sup>C NMR (C<sub>6</sub>D<sub>6</sub>, 125 MHz)  $\delta$  202.8, 134.6, 117.6, 99.0, 74.6, 59.7, 49.8, 37.0, 20.2, 15.4, 7.7; IR (neat)  $\nu_{\max}$  1726, 1081 cm<sup>-1</sup>; HRMS (ESI-TOF) calcd for C<sub>11</sub>H<sub>20</sub>O<sub>3</sub> + Na<sup>+</sup>: 223.1305; found: 223.1304.

Data for **40b**:  $[\alpha]_D^{25} -54$  (*c* 0.23, CHCl<sub>3</sub>); <sup>1</sup>H NMR (C<sub>6</sub>D<sub>6</sub>, 400 MHz)  $\delta$  9.49 (d, *J* = 0.8 Hz, 1H), 5.70–5.58 (m, 1H), 5.00–4.96 (m, 1H), 4.96–4.93 (m, 1H), 4.51 (q, *J* = 5.2 Hz, 1H), 3.88 (ddd, *J* = 7.6, 6.0, 3.6 Hz, 1H), 3.37 (dq, *J* = 9.2, 7.2 Hz, 1H), 3.24 (dq, *J* = 9.2, 7.2 Hz, 1H), 2.44–2.35 (m, 1H), 2.21–2.12 (m, 1H), 2.09 (qdd, *J* = 7.2, 3.6, 0.8 Hz, 1H), 1.12 (d, *J* = 5.2 Hz, 3H), 1.05 (t, *J* = 6.8 Hz, 3H), 0.97 (d, *J* = 7.2 Hz, 3H); <sup>13</sup>C NMR (C<sub>6</sub>D<sub>6</sub>, 100 MHz)  $\delta$  202.8, 134.9, 117.4,

99.9, 75.0, 60.0, 49.7, 37.8, 20.2, 15.4, 7.7; IR (neat)  $\nu_{\max}$  1726, 1082  $\text{cm}^{-1}$ ; HRMS (ESI-TOF) calcd for  $\text{C}_{11}\text{H}_{20}\text{O}_3 + \text{Na}^+$ : 223.1305; found: 223.1302.

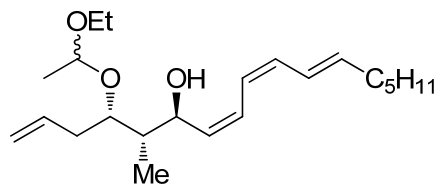

**(4*S*,5*S*,6*S*,7*Z*,9*Z*,11*E*)-4-(1-Ethoxyethoxy)-5-methylheptadeca-1,7,9,11-tetraen-6-ol (41).**

Prepared from **9** and **40a** in 78% yield (0.038 g, >10:1 selectivity) according to the same procedure used for **59**. Purified by flash chromatography ( $\text{SiO}_2$  pretreated with 2%  $\text{Et}_3\text{N}$ /hexanes, 5–20%  $\text{EtOAc}$ /hexanes gradient) to give **41** as a yellow oil:  $[\alpha]_{\text{D}}^{25} -5.4$  ( $c$  0.65,  $\text{CHCl}_3$ );  $^1\text{H}$  NMR ( $\text{C}_6\text{D}_6$ , 500 MHz)  $\delta$  6.66 (t,  $J = 11.5$  Hz, 1H), 6.62–6.53 (m, 1H), 6.40 (t,  $J = 11.5$  Hz, 1H), 6.00 (t,  $J = 11.0$  Hz, 1H), 5.72–5.58 (m, 3H), 5.09–4.94 (m, 2H), 4.84 (td,  $J = 9.0$ , 4.0 Hz, 1H), 4.48 (q,  $J = 5.0$  Hz, 1H), 4.19 (td,  $J = 7.0$ , 2.5 Hz, 1H), 4.02 (d,  $J = 4.0$  Hz, 1H), 3.22–3.10 (m, 2H), 2.40–2.32 (m, 1H), 2.19–2.10 (m, 1H), 1.98 (q,  $J = 7.0$  Hz, 2H), 1.73–1.64 (m, 1H), 1.38–1.08 (m, 6H), 1.16 (d,  $J = 5.0$  Hz, 3H), 1.05 (t,  $J = 7.0$  Hz, 3H), 0.96 (d,  $J = 7.0$  Hz, 3H), 0.85 (t,  $J = 7.0$  Hz, 3H);  $^{13}\text{C}$  NMR ( $\text{C}_6\text{D}_6$ , 125 MHz)  $\delta$  136.8, 135.5, 134.6, 131.0, 126.1, 125.1, 123.3, 117.1, 100.4, 75.1, 68.9, 61.9, 43.2, 37.6, 33.3, 31.7, 29.3, 22.9, 20.3, 15.2, 14.2, 9.9; IR (neat)  $\nu_{\max}$  3445, 1055, 988  $\text{cm}^{-1}$ ; HRMS (ESI-TOF) calcd for  $\text{C}_{22}\text{H}_{38}\text{O}_3 + \text{Na}^+$ : 373.2713; found: 373.2710.

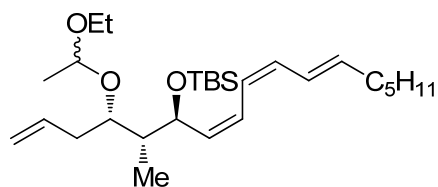

**(5*S*,6*R*,7*S*)-7-Allyl-2,2,3,3,6,9-hexamethyl-5-((1*Z*,3*Z*,5*E*)-undeca-1,3,5-trien-1-yl)-4,8,10-trioxa-3-siladodecane (42).** AgNO<sub>3</sub> (0.09 g, 0.5 mmol) was added to a solution of **41** (0.038 g, 0.11 mmol) in CH<sub>2</sub>Cl<sub>2</sub>/pyridine (1:1) (2.2 mL) at room temperature with stirring. TBSCl (0.083 g, 0.55 mmol) was added, and the mixture was stirred in the dark overnight. The mixture was filtered through Celite and concentrated. The crude material was purified by flash chromatography (SiO<sub>2</sub> pretreated with 2% Et<sub>3</sub>N/hexanes, hexanes eluent) to give 0.040 g (78%) of **42** as a colorless oil:  $[\alpha]_D^{25} -41$  (*c* 0.48, CHCl<sub>3</sub>); <sup>1</sup>H NMR (C<sub>6</sub>D<sub>6</sub>, 500 MHz)  $\delta$  6.54 (t, *J* = 11.5 Hz, 1H), 6.54–6.50 (m, 1H), 6.40 (t, *J* = 11.5 Hz, 1H), 6.04 (t, *J* = 11.5 Hz, 1H), 5.90–5.80 (m, 1H), 5.62 (dt, *J* = 15.0, 7.0 Hz, 1H), 5.44 (t, *J* = 10.5 Hz, 1H), 5.15–5.02 (m, 2H), 4.96–4.89 (m, 1H), 4.74 (q, *J* = 5.0 Hz, 1H), 4.18 (ddd, *J* = 7.5, 5.0, 3.0 Hz, 1H), 3.61 (dq, *J* = 9.5, 7.0, Hz, 1H), 3.44 (dq, *J* = 9.0, 7.0 Hz, 1H), 2.50–2.42 (m, 1H), 2.32–2.24 (m, 1H), 1.98 (q, *J* = 7.0 Hz, 2H), 1.92–1.85 (m, 1H), 1.31 (d, *J* = 5.0 Hz, 3H), 1.29–1.10 (m, 6H), 1.06 (d, *J* = 3H), 1.04 (s, 9H), 0.85 (t, *J* = 7.0 Hz, 3H), 0.23 (s, 3H), 0.19 (s, 3H); <sup>13</sup>C NMR (C<sub>6</sub>D<sub>6</sub>, 125 MHz)  $\delta$  137.5, 135.8, 134.1, 131.6, 125.9, 124.9, 122.5, 116.8, 99.1, 74.6, 69.7, 60.8, 43.9, 37.7, 33.3, 31.7, 29.3, 26.3, 22.9, 21.1, 18.5, 15.8, 14.2, 10.0, –3.0, –4.3; IR (neat)  $\nu_{\max}$  1058 cm<sup>–1</sup>; HRMS (ESI-TOF) calcd for C<sub>28</sub>H<sub>52</sub>O<sub>3</sub>Si + Na<sup>+</sup>: 487.3578; found: 487.3583.

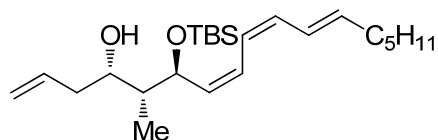

**(4S,5R,6S,7Z,9Z,11E)-6-((*tert*-Butyldimethylsilyl)oxy)-5-methylheptadeca-1,7,9,11-tetraen-4-ol (43).** A solution of 0.5 M aq. HCl (0.55 mL) was added to a solution of **42** (0.040 g, 0.086 mmol) in THF (35 mL) at room temperature with stirring. After 2.5 h, saturated aq. NaHCO<sub>3</sub> was added, and the mixture was extracted with EtOAc. The combined organic extracts were washed with H<sub>2</sub>O, saturated sodium chloride, dried (Na<sub>2</sub>SO<sub>4</sub>) and concentrated. The crude alcohol was purified by flash chromatography (SiO<sub>2</sub>, 3% EtOAc/hexanes) to give 0.028 g (82%) of **43** as a colorless oil:  $[\alpha]_D^{25} -45$  (*c* 0.27, CHCl<sub>3</sub>); <sup>1</sup>H NMR (C<sub>6</sub>D<sub>6</sub>, 500 MHz)  $\delta$  6.55–6.47 (m, 1H), 6.44 (t, *J* = 11.5 Hz, 1H), 6.13 (t, *J* = 11.0 Hz, 1H), 6.03 (t, *J* = 11.0 Hz, 1H), 5.93–5.83 (m, 1H), 5.64 (dt, *J* = 15.0, 7.0 Hz, 1H), 5.54 (t, 11.0 Hz, 1H), 5.10–4.98 (m, 2H), 4.74 (dd, *J* = 9.0, 5.5 Hz, 1H), 4.26 (ddd, *J* = 10.5, 5.0, 2.0 Hz, 1H), 2.60 (d, *J* = 3.0 Hz, 1H), 2.39–2.32 (m, 1H), 2.10–2.03 (m, 1H), 1.99 (q, *J* = 7.0 Hz, 1H), 1.65–1.58 (m, 1H), 1.32–1.12 (m, 6H), 0.98 (d, *J* = 7.0 Hz, 3H), 0.96 (s, 9H), 0.85 (t, *J* = 7.0 Hz, 3H), 0.11 (s, 3H), 0.09 (s, 3H); <sup>13</sup>C NMR (C<sub>6</sub>D<sub>6</sub>, 125 MHz)  $\delta$  137.8, 136.2, 134.3, 131.8, 125.8, 124.1, 121.9, 116.7, 73.1, 70.2, 43.7, 40.1, 33.3, 31.7, 29.3, 26.0, 22.9, 18.3, 14.2, 10.2, –3.9, –4.9; IR (neat)  $\nu_{\max}$  3510, 837 cm<sup>-1</sup>; HRMS (ESI-TOF) calcd for C<sub>24</sub>H<sub>44</sub>O<sub>2</sub>Si + Na<sup>+</sup>: 415.3003; found: 415.3010.

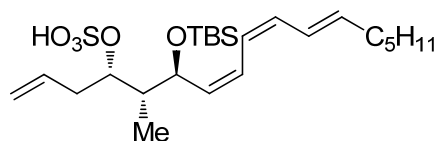

***tert*-Butyldimethyl(((4S,5S,6S,7Z,9Z,11E)-5-methyl-4-((trioxidanylthio)oxy)heptadeca-1,7,9,11-tetraen-6-yl)oxy)silane (44).** SO<sub>3</sub>-pyridine complex (0.004 g, 0.03 mmol) was added

to a solution of **43** (0.0050 g, 0.013 mmol) in 0.5 mL of THF with stirring at room temperature. After 10 min, the mixture was transferred directly onto a short silica gel column and eluted with 15% MeOH/CH<sub>2</sub>Cl<sub>2</sub> to give 0.0060 g (98%) of **44** as a white solid:  $[\alpha]_D^{25} -38$  (*c* 0.15, MeOH); <sup>1</sup>H NMR (CD<sub>3</sub>OD, 500 MHz)  $\delta$  6.60–6.50 (m, 2H), 6.23 (t, *J* = 11.0 Hz, 1H), 6.02 (t, *J* = 11.0 Hz, 1H), 5.88–5.73 (m, 2H), 5.32 (t, *J* = 10.5 Hz, 1H), 5.15–5.02 (m, 2H), 4.80–4.72 (m, 2H), 2.76–2.68 (m, 1H), 2.45 (dt, *J* = 14.0, 8.0 Hz, 1H), 2.15 (q, *J* = 7.0 Hz, 2H), 1.77–1.68 (m, 1H), 1.43 (p, *J* = 7.0 Hz, 2H), 1.39–1.27 (m, 4H), 0.91 (t, *J* = 7.0 Hz, 3H), 0.88 (s, 9H), 0.82 (d, 7.0 Hz, 3H), 0.12 (s, 3H), 0.02 (s, 3H); <sup>13</sup>C NMR (CD<sub>3</sub>OD, 150 MHz)  $\delta$  138.2, 135.9, 134.5, 132.1, 126.7, 125.7, 123.5, 117.5, 79.2, 70.1, 43.6, 38.4, 34.0, 32.7, 30.2, 26.7, 23.6, 19.0, 14.4, 9.8, –3.5, –4.3; IR (neat)  $\nu_{\max}$  3441, 1249, 1066 cm<sup>-1</sup>; HRMS (ESI-TOF) calcd for C<sub>24</sub>H<sub>44</sub>O<sub>5</sub>SSi – H<sup>+</sup>: 471.2606; found: 471.2603.

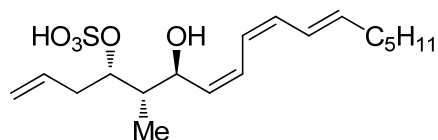

**(4S,5S,6S,7Z,9Z,11E)-6-Hydroxy-5-methylheptadeca-1,7,9,11-tetraen-4-yl Sulfate (45).** HF-pyr (0.24 mL) in 0.47 mL of THF was added to a solution of **44** in 0.47 mL of THF and 0.12 mL pyridine at room temperature with stirring. After 3 h, the mixture was carefully transferred to a solution of saturated aq. NaHCO<sub>3</sub> and the mixture was thoroughly extracted with EtOAc. The combined organic extracts were dried (Na<sub>2</sub>SO<sub>4</sub>) and concentrated. The crude material was purified by flash chromatography (SiO<sub>2</sub>, 15% MeOH/CH<sub>2</sub>Cl<sub>2</sub>) to give 4.0 mg (80%) of **45** as an amorphous white solid:  $[\alpha]_D^{25} -48$  (*c* 0.10, MeOH); <sup>1</sup>H NMR (CD<sub>3</sub>OD, 500 MHz)  $\delta$  6.60 (t, *J* = 11.5 Hz, 1H), 6.57–6.51 (m, 1H), 6.21 (t, *J* = 11.5 Hz, 1H), 6.02 (t, *J* = 11.0 Hz, 1H), 5.85–5.73 (m, 2H), 5.37 (t, *J* = 9.5 Hz, 1H), 5.16–5.02 (m, 2H), 4.79 (ddd, *J* = 9.5, 5.0, 2.0 Hz, 1H), 4.59 (t,

$J = 9.5$  Hz, 1H), 4.57 (s, 1H), 2.79–2.72 (m, 1H), 2.41 (dt,  $J = 13.0, 9.5$  Hz, 1H), 2.14 (q,  $J = 7.0$  Hz, 2H), 1.67–1.59 (m, 1H), 1.43 (p,  $J = 7.0$  Hz, 2H), 1.38–1.25 (m, 4H), 0.91 (t,  $J = 7.0$  Hz, 3H), 0.81 (d,  $J = 7.0$  Hz, 3H);  $^{13}\text{C}$  NMR ( $\text{CD}_3\text{OD}$ , 150 MHz)  $\delta$  138.2, 135.4, 133.2, 132.3, 126.8, 126.7, 123.3, 117.9, 78.2, 68.8, 42.8, 38.2, 34.0, 32.6, 30.2, 23.6, 14.4, 9.2; IR (film)  $\nu_{\text{max}}$  3426, 1215, 1065, 941  $\text{cm}^{-1}$ ; HRMS (ESI-TOF) calcd for  $\text{C}_{18}\text{H}_{30}\text{O}_5\text{S} - \text{H}^+$ : 357.1741; found: 357.1732.

Purification of **45** by reverse phase  $\text{C}_{18}$  silica gel chromatography ( $\text{H}_2\text{O}/\text{MeCN}$  eluent), which does not affect counterion identity or protonation state, resulted in **45** identical spectroscopically to the product obtained from normal phase silica gel chromatography. Passing the material through a column of Dowex- $\text{Na}^+$  resin also yielded **45** with identical spectroscopic characterization

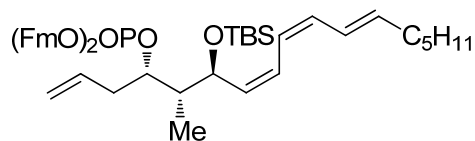

**Bis((9*H*-fluoren-9-yl)methyl) ((4*S*,5*S*,6*S*,7*Z*,9*Z*,11*E*)-6-((*tert*-butyldimethylsilyl)oxy)-5-methylheptadeca-1,7,9,11-tetraen-4-yl) Phosphate (**46**).** Prepared in 75% yield (9 mg) from **43** according to the procedure used to synthesize **64**. Purified by flash chromatography ( $\text{SiO}_2$ , 10% EtOAc/hexanes) to give **46** as a colorless oil:  $[\alpha]_{\text{D}}^{25} -29$  ( $c$  0.30,  $\text{CHCl}_3$ );  $^1\text{H}$  NMR ( $\text{C}_6\text{D}_6$ , 500 MHz)  $\delta$  7.56–7.49 (m, 5H), 7.49–7.45 (m, 2H), 7.38–7.33 (m, 1H), 7.23–7.17 (m, 3H), 7.14–7.09 (m, 4H), 7.07–7.03 (m, 1H), 6.54–6.46 (m, 2H), 6.38 (t,  $J = 11.5$  Hz, 1H), 5.93 (t,  $J = 11.0$  Hz, 1H), 5.79–5.68 (m, 1H), 5.58 (dt,  $J = 15.0, 7.0$  Hz, 1H), 5.32 (t,  $J = 10.5$  Hz, 1H), 5.18–5.12 (m, 1H), 5.05–4.94 (m, 3H), 4.34–4.15 (m, 4H), 4.07 (t,  $J = 7.0$  Hz, 1H), 3.90 (t,  $J = 6.5$  Hz, 1H), 2.58 (dt,  $J = 14.0, 6.5$  Hz, 1H), 2.29 (dt,  $J = 14.5, 7.5$  Hz, 1H), 1.97 (q,  $J = 7.0$  Hz, 2H), 1.84–1.76 (m, 1H), 1.30–1.12 (m, 6H), 1.06 (s, 9 H), 0.88 (d,  $J = 7.0$  Hz, 3H), 0.85 (t,  $J = 7.0$  Hz,

3H), 0.36 (s, 3H), 0.21 (s, 3H);  $^{13}\text{C}$  NMR ( $\text{C}_6\text{D}_6$ , 150 MHz)  $\delta$  143.95, 143.90, 143.81, 143.80, 141.81, 141.78, 137.6, 134.2, 133.5, 132.0, 127.4, 127.3, 125.9, 125.8, 125.6, 125.4, 125.2, 122.3, 120.3, 120.23, 120.20, 120.15, 117.8, 78.21, 78.17, 69.50, 69.46, 69.41, 68.98, 68.94, 48.5, 48.4, 43.71, 43.67, 38.83, 38.81, 33.3, 31.7, 29.4, 29.2, 26.4, 22.9, 18.5, 14.2, 9.5, -3.3, -4.4;  $^{31}\text{P}$  NMR ( $\text{C}_6\text{D}_6$ , 160 MHz)  $\delta$  -0.4; IR (neat)  $\nu_{\text{max}}$  1450, 1007  $\text{cm}^{-1}$ ; HRMS (ESI-TOF) calcd for  $\text{C}_{52}\text{H}_{65}\text{O}_5\text{PSi} + \text{Na}^+$ : 851.4231; found: 851.4244.

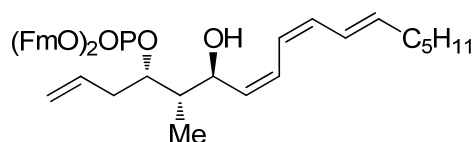

**Bis((9H-fluoren-9-yl)methyl) ((4S,5S,6S,7Z,9Z,11E)-6-hydroxy-5-methylheptadeca-1,7,9,11-tetraen-4-yl) Phosphate (47).** HF-pyr (0.41 mL) in 0.8 mL of THF was added at room temperature to a solution of **46** (0.017g, 0.021 mmol) in THF (0.8 mL) and pyridine (0.18 mL), and the solution was stirred for 18 h. The reaction mixture was carefully transferred to a gently stirred mixture of saturated aqueous  $\text{NaHCO}_3$  (9 mL) and EtOAc (3.5 mL) and was stirred until  $\text{CO}_2$  evolution ceased. The phases were separated, and the aqueous phase was thoroughly extracted with EtOAc. The combined organic extracts were dried ( $\text{Na}_2\text{SO}_4$ ), concentrated, and the residue was purified by flash chromatography ( $\text{SiO}_2$ , 25% EtOAc/hexanes) to give 0.11 g (73%) of **47** as a colorless oil:  $[\alpha]_{\text{D}}^{25}$  -3.4 ( $c$  0.20,  $\text{CHCl}_3$ );  $^1\text{H}$  NMR ( $\text{C}_6\text{D}_6$ , 500 MHz)  $\delta$  7.55–7.46 (m, 5H), 7.44–7.38 (m, 4H), 7.33–7.27 (m, 2H), 7.24–7.04 (m, 5H), 6.63 (t,  $J$  = 11.5 Hz, 1H), 6.60–6.57 (m, 1H), 6.34 (t,  $J$  = 11.5 Hz, 1H), 5.97 (t,  $J$  = 11.5 Hz, 1H), 5.67–5.58 (m, 2H), 5.53–5.43 (m, 1H), 5.14–5.07 (m, 1H), 4.91–4.81 (m, 2H), 4.81–4.74 (m, 1H), 4.72 (d,  $J$  = 5.0 Hz, 1H), 4.27–4.08 (m, 4H), 3.93 (t,  $J$  = 6.5 Hz, 1H), 3.79 (t,  $J$  = 6.0 Hz, 1H), 2.35–2.26 (m, 1H), 2.05–1.95 (m, 3H), 1.63–1.54 (m, 1H), 1.40–1.14 (m, 6H), 0.85 (t,  $J$  = 7.0 Hz, 3H), 0.78 (d,  $J$

=7.0 Hz, 3H);  $^{13}\text{C}$  NMR ( $\text{C}_6\text{D}_6$ , 150 MHz)  $\delta$  143.7, 143.61, 143.58, 143.5, 141.85, 141.80, 141.77, 141.75, 137.2, 134.0, 133.9, 131.3, 127.42, 127.41, 127.35, 126.1, 125.6, 125.4, 125.33, 125.31, 125.25, 123.0, 120.3, 120.24, 120.17, 117.7, 77.82, 77.78, 69.72, 69.68, 69.22, 69.18, 67.9, 48.33, 48.28, 48.2, 43.69, 43.66, 38.37, 38.35, 33.3, 31.7, 29.3, 22.9, 14.2, 8.7;  $^{31}\text{P}$  NMR ( $\text{C}_6\text{D}_6$ , 160 MHz)  $\delta$  1.5 IR (neat)  $\nu_{\text{max}}$  3399, 1450, 1009, 739  $\text{cm}^{-1}$ ; HRMS (ESI-TOF) calcd for  $\text{C}_{46}\text{H}_{51}\text{O}_5\text{P} + \text{Na}^+$ : 737.3366; found: 737.3369.

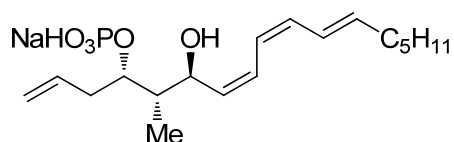

**Sodium (4S,5S,6S,7Z,9Z,11E)-6-Hydroxy-5-methylheptadeca-1,7,9,11-tetraen-4-yl**

**Hydrogenphosphate (48).**  $\text{Et}_3\text{N}$  (0.71 mL) was added to a solution of **47** (11 mg, 0.015 mmol) in MeCN (2.8 mL) at room temperature with stirring. The mixture was stirred for 16 h and was then concentrated under a stream of  $\text{N}_2$ .  $\text{H}_2\text{O}$  (~5 mL) was then added and the cloudy white mixture was washed repeatedly with hexanes. The aqueous layer was concentrated under reduced pressure, and the residue was dissolved in 1:1 MeCN/ $\text{H}_2\text{O}$  and passed through a short column of Dowex- $\text{Na}^+$  (2 cm  $\times$  1 cm, 1:1 MeCN/ $\text{H}_2\text{O}$  eluent). The water was azeotroped with MeCN and the residue was purified by flash chromatography ( $\text{C}_{18}$  reverse phase  $\text{SiO}_2$ , 0–20% MeCN/ $\text{H}_2\text{O}$  gradient) to give 4.6 mg (81%) of **48** as a white solid:  $[\alpha]_{\text{D}}^{25}$  -25 ( $c$  0.23, MeOH);  $^1\text{H}$  NMR ( $\text{CD}_3\text{OD}$ , 600 MHz)  $\delta$  6.59 (t,  $J$  = 10.8 Hz, 1H), 6.55–6.52 (m, 1H), 6.25 (t,  $J$  = 11.4 Hz, 1H), 6.00 (t,  $J$  = 11.4 Hz, 1H), 5.85–5.78 (m, 1H), 5.76 (dt,  $J$  = 15.0, 7.2 Hz, 1H), 5.37 (t,  $J$  = 9.6 Hz, 1H), 5.10 (dd,  $J$  = 17.4, 1.2 Hz, 1H), 5.02 (d,  $J$  = 10.2 Hz, 1H), 4.63–4.58 (m, 1H), 4.56 (t,  $J$  = 9.6 Hz, 1H), 2.67–2.61 (m, 1H), 2.33 (dt,  $J$  = 13.2, 9.0 Hz, 1H), 2.14 (q,  $J$  = 7.2 Hz, 2H), 1.55–1.48 (m, 1H), 1.43 (p,  $J$  = 7.2 Hz, 2H), 1.38–1.25 (m, 6H), 0.91 (t,  $J$  = 7.2 Hz, 3H), 0.79 (d,



$J = 6.6$  Hz, 3H);  $^{13}\text{C}$  NMR ( $\text{CD}_3\text{OD}$ , 150 MHz)  $\delta$  138.0, 136.0, 133.8, 131.9, 126.8, 126.6, 123.6, 117.3, 74.11, 74.07, 68.8, 43.50, 43.47, 39.27, 39.26, 34.0, 32.7, 30.2, 23.6, 14.5, 8.9;  $^{31}\text{P}$  NMR ( $\text{CD}_3\text{OD}$ , 160 MHz) 2.8; IR (film)  $\nu_{\text{max}}$  3359, 1666, 998  $\text{cm}^{-1}$ ; HRMS (ESI-TOF) calcd for  $\text{C}_{18}\text{H}_{30}\text{NaO}_5\text{P} + \text{H}^+$ : 381.1801; found: 381.1801.

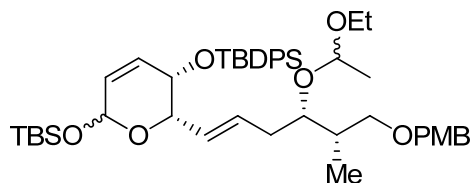

**tert-Butyl(((2S,3S)-6-((tert-butyl dimethylsilyl)oxy)-2-((4S,5S,E)-4-(1-ethoxyethoxy)-6-((4-methoxybenzyl)oxy)-5-methylhex-1-en-1-yl)-3,6-dihydro-2H-pyran-3-yl)oxy)diphenylsilane (50).** Prepared from **26** in quantitative yield (0.125 g) according to the same procedure used to synthesize **61**. The crude material was purified by flash chromatography ( $\text{SiO}_2$  pretreated with 2%  $\text{Et}_3\text{N}$ /hexanes, 3%  $\text{EtOAc}$ /hexanes) to give **50** contaminated with a small amount of silicon impurity as a colorless oil:  $[\alpha]_{\text{D}}^{25} +25$  ( $c$  0.33,  $\text{CHCl}_3$ );  $^1\text{H}$  NMR ( $\text{C}_6\text{D}_6$ , 400 MHz) see spectrum;  $^{13}\text{C}$  NMR ( $\text{C}_6\text{D}_6$ , 150 MHz)  $\delta$  see spectrum; IR (film)  $\nu_{\text{max}}$  1108, 754  $\text{cm}^{-1}$ ; HRMS (ESI-TOF) calcd for  $\text{C}_{46}\text{H}_{68}\text{O}_7\text{Si}_2 + \text{Na}^+$  811.4396; found 811.4380.

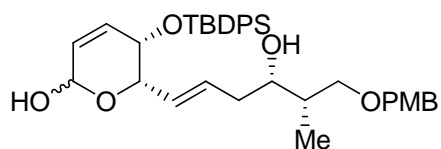

**(5S,6S)-5-((tert-butyl diphenylsilyl)oxy)-6-((4S,5S,E)-4-hydroxy-6-((4-methoxybenzyl)oxy)-5-methylhex-1-en-1-yl)-5,6-dihydro-2H-pyran-2-ol (51).** Prepared from **50** in 52% yield (over 3 steps, 0.049 g) according to the same procedure used to synthesize **62**. The crude lactol was purified by flash chromatography ( $\text{SiO}_2$ , 33%  $\text{EtOAc}$ /hexanes) to give **51** as a colorless oil:

$[\alpha]_D^{25} +24$  (*c* 1.6, CHCl<sub>3</sub>); <sup>1</sup>H NMR (C<sub>6</sub>D<sub>6</sub>, 600 MHz) see spectrum; <sup>13</sup>C NMR (C<sub>6</sub>D<sub>6</sub>, 150 MHz) see spectrum; IR (film)  $\nu_{\max}$  3410, 1246, 1105, 701 cm<sup>-1</sup>; HRMS (ESI-TOF) calcd for C<sub>36</sub>H<sub>46</sub>O<sub>6</sub>Si + Na<sup>+</sup> 625.2956; found 625.2948.

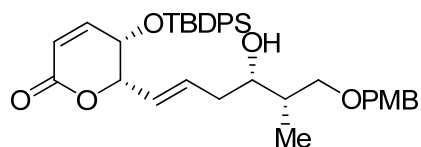

**(5*S*,6*S*)-5-((*tert*-Butyldiphenylsilyl)oxy)-6-((4*S*,5*S*,*E*)-4-hydroxy-6-((4-methoxybenzyl)oxy)-5-methylhex-1-en-1-yl)-5,6-dihydro-2*H*-pyran-2-one (52).** Prepared from **51** in 59% yield (0.029 g) according to the same procedure used to synthesize **63**. The crude lactone was purified by flash chromatography (SiO<sub>2</sub>, 20–30% EtOAc/hexanes gradient) to give **52** as a colorless oil:  $[\alpha]_D^{25} +43$  (*c* 0.53, CHCl<sub>3</sub>); <sup>1</sup>H NMR (C<sub>6</sub>D<sub>6</sub>, 400 MHz)  $\delta$  7.70–7.58 (m, 4H), 7.25–7.16 (m, 8H), 6.82–7.75 (m, 2H), 5.92 (dd, *J* = 15.6, 6.8 Hz, 1H), 5.89 (dd, *J* = 10.0, 4.4 Hz, 1H), 5.81 (dt, *J* = 15.6, 6.8 Hz, 1H), 5.67 (d, *J* = 10.0 Hz, 1H), 4.28–4.19 (m, 3H), 3.85 (dd, *J* = 4.4, 3.6 Hz, 1H), 3.85–3.79 (m, 1H), 3.36–3.26 (m, 2H), 3.30 (s, 3H), 2.39 (brs, 1H), 2.31–2.22 (m, 1H), 2.16–2.07 (m, 1H), 1.79–1.63 (m, 1H), 1.06 (s, 9H), 0.93 (d, *J* = 6.8 Hz, 3H); <sup>13</sup>C NMR (C<sub>6</sub>D<sub>6</sub>, 150 MHz)  $\delta$  162.4, 159.8, 144.3, 136.20, 136.19, 133.7, 133.2, 130.7, 130.4, 130.3, 129.5, 127.1, 122.5, 114.2, 81.3, 74.4, 73.2, 73.0, 65.1, 54.8, 38.13, 38.11, 27.0, 19.5, 10.9; IR (film)  $\nu_{\max}$  3492, 1726, 1093, 701 cm<sup>-1</sup>; HRMS (ESI-TOF) calcd for C<sub>36</sub>H<sub>44</sub>O<sub>6</sub>Si + Na<sup>+</sup> 623.2799; found 623.2776.

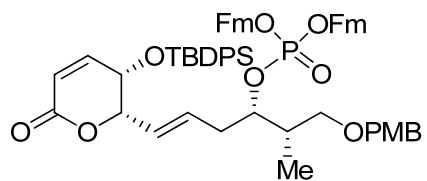

**Bis((9*H*-fluoren-9-yl)methyl) ((2*S*,3*S*,*E*)-6-((2*S*,3*S*)-3-((*tert*-butyldiphenylsilyl)oxy)-6-oxo-3,6-dihydro-2*H*-pyran-2-yl)-1-((4-methoxybenzyl)oxy)-2-methylhex-5-en-3-yl) Phosphate**

**(53).** Prepared from **52** in 95% yield (0.023 g) according to the same procedure used to synthesize **64**. The crude product was purified by flash chromatography (SiO<sub>2</sub>, 20–30% EtOAc/hexanes gradient) to give **53** as a colorless oil:  $[\alpha]_D^{25} +26$  (*c* 0.18, CHCl<sub>3</sub>); <sup>1</sup>H NMR (C<sub>6</sub>D<sub>6</sub>, 600 MHz)  $\delta$  7.63–7.57 (m, 4H), 7.55–7.40 (m, 8H), 7.27–7.06 (m, 16H), 6.81–6.75 (m, 2H), 5.87 (dd, *J* = 9.6, 4.2 Hz, 1H), 5.85 (dd, *J* = 15.6, 7.2 Hz, 1H), 5.68 (d, *J* = 9.6 Hz, 1H), 5.60 (dt, *J* = 15.6, 7.2 Hz, 1H), 4.76–4.71 (m, 1H), 4.37–4.19 (m, 6H), 4.11 (dd, *J* = 7.2, 3.0 Hz, 1H), 3.96 (t, *J* = 6.0 Hz, 1H), 3.93 (t, *J* = 6.0 Hz, 1H), 3.77 (dd, *J* = dd, 4.2, 3.0 Hz, 1H), 3.39 (dd, *J* = 8.4, 7.8 Hz, 1H), 3.28 (s, 3H), 3.21 (dd, *J* = 9.0, 6.0 Hz, 1H), 2.61–2.54 (m, 1H), 2.37–2.30 (m, 1H), 2.03–1.95 (m, 1H), 1.03 (s, 9H), 0.84 (d, *J* = 7.2 Hz, 3H); <sup>13</sup>C NMR (C<sub>6</sub>D<sub>6</sub>, 150 MHz)  $\delta$  162.3, 159.7, 144.2, 143.9, 143.8, 141.83, 141.79, 136.1, 133.7, 133.1, 131.1, 130.9, 130.5, 130.3, 129.5, 127.5, 127.41, 127.37, 127.3, 125.63, 125.56, 125.52, 125.50, 125.38, 125.37, 122.6, 120.3, 120.24, 120.20, 120.18, 114.1, 80.9, 78.93, 78.89, 73.0, 71.8, 69.21, 69.17, 69.11, 69.08, 65.0, 54.8, 48.50, 48.47, 48.45, 48.42, 37.04, 37.01, 36.34, 36.33, 30.2, 26.9, 19.5, 10.9; <sup>31</sup>P NMR (C<sub>6</sub>D<sub>6</sub>, 160 MHz)  $\delta$  –0.3; IR (film)  $\nu_{\max}$  1730, 1246, 987 cm<sup>–1</sup>; HRMS (ESI-TOF) calcd for C<sub>64</sub>H<sub>65</sub>O<sub>9</sub>PSi + H<sup>+</sup> 1037.4208; found 1037.4205.

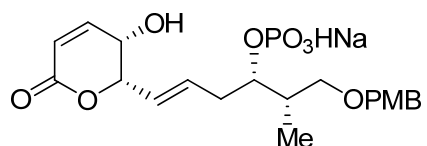

**Sodium (2*S*,3*S*,*E*)-6-((2*S*,3*S*)-3-Hydroxy-6-oxo-3,6-dihydro-2*H*-pyran-2-yl)-1-((4-methoxybenzyl)oxy)-2-methylhex-5-en-3-yl Hydrogenphosphate (55).** Et<sub>3</sub>N (0.37 mL) was added at room temperature to a solution of **53** (7.4 mg, 0.0071 mmol) in MeCN (1.3 mL). The mixture was stirred overnight before toluene (1.6 mL) was added, and the mixture was concentrated under a stream of N<sub>2</sub>. H<sub>2</sub>O (2.5 mL) was added to the residue, and the mixture was washed repeatedly with hexanes. The aqueous phase was azeotroped with MeCN under reduced pressure, and the residue was dissolved in MeCN (0.45 mL). TAS-F (1.0 M in DMF, 0.014 mL, 0.014 mmol) was added to the solution, and the mixture was stirred overnight at room temperature after which time it was concentrated. The residue was dissolved in 0.1 M sodium phosphate buffer (pH 7) and was purified by flash chromatography (C<sub>18</sub> reverse phase SiO<sub>2</sub>, 0–10% MeCN/H<sub>2</sub>O gradient) giving 2.21 mg (over 2 steps, 67%) of **55** as a white solid:  $[\alpha]_D^{25} +40$  (*c* 0.42, MeOH); <sup>1</sup>H NMR (CD<sub>3</sub>OD, 600 MHz)  $\delta$  7.30–7.25 (m, 2H), 7.04 (dd, *J* = 9.6, 6.0 Hz, 1H), 6.92–6.85 (m, 2H), 6.05 (d, *J* = 9.6 Hz, 1H), 5.94 (dt, *J* = 15.6, 7.2 Hz, 1H), 5.78 (dd, *J* = 15.6, 7.8 Hz, 1H), 4.84 (dd, *J* = 7.8, 2.4 Hz, 1H), 4.47 (d, *J* = 11.4 Hz, 1H), 4.39 (d, *J* = 11.4 Hz, 1H), 4.32–4.26 (m, 1H), 4.22 (dd, *J* = 6.0, 3.0 Hz, 1H), 3.78 (s, 3H), 3.63 (dd, *J* = 9.6, 6.0 Hz, 1H), 3.42 (dd, *J* = 9.0, 7.2 Hz, 1H), 2.53–2.47 (m, 1H), 2.45–2.39 (m, 1H), 2.06–1.98 (m, 1H), 0.99 (d, *J* = 7.2 Hz, 3H); <sup>13</sup>C NMR (CD<sub>3</sub>OD, 150 MHz)  $\delta$  166.4, 160.7, 147.5, 134.2, 132.1, 130.6, 127.8, 122.7, 114.7, 83.6, 76.7, 76.6, 74.0, 73.7, 63.7, 55.7, 38.6, 37.4, 12.2; <sup>31</sup>P NMR (CD<sub>3</sub>OD 160 MHz)  $\delta$  2.4; IR (film)  $\nu_{\max}$  3350, 1709, 1249, 1027 cm<sup>-1</sup>; HRMS (ESI-TOF) calcd for C<sub>20</sub>H<sub>27</sub>O<sub>9</sub>P + H<sup>+</sup> 443.1465; found 443.1452.

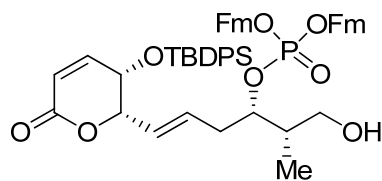

**Bis ((9H-fluoren-9-yl)methyl) ((2S,3S,E)-6-((2S,3S)-3-((tert-butylidiphenylsilyl)oxy)-6-oxo-3,6-dihydro-2H-pyran-2-yl)-1-hydroxy-2-methylhex-5-en-3-yl) Phosphate (56).** Prepared from **53** in 70% yield (5.0 mg) according to the same procedure used to synthesize **39**. The crude product was purified by flash chromatography (SiO<sub>2</sub>, 50–100% EtOAc/hexanes gradient) to give the product as a colorless oil:  $[\alpha]_D^{25} +28$  (*c* 0.32, CHCl<sub>3</sub>); <sup>1</sup>H NMR (C<sub>6</sub>D<sub>6</sub>, 600 MHz)  $\delta$  7.63–7.43 (m, 9H), 7.39–7.33 (m, 3H), 7.26–7.16 (m, 10H), 7.13–7.05 (m, 4H), 5.88 (dd, *J* = 9.6, 4.8 Hz, 1H), 5.75 (dd, *J* = 15.6, 6.6 Hz, 1H), 5.67 (d, *J* = 9.6 Hz, 1H), 5.52 (dt, *J* = 15.6, 7.2 Hz, 1H), 4.86–4.80 (m, 1H), 4.30 (dt, *J* = 10.2, 6.6 Hz, 1H), 4.18 (dt, *J* = 10.2, 6.6 Hz, 1H), 4.15–4.05 (m, 3H), 3.87 (t, *J* = 6.0 Hz, 1H), 3.84 (t, *J* = 6.0 Hz, 1H), 3.77 (dd, *J* = 4.8, 3.6 Hz, 1H), 3.62 (dd, *J* = 11.4, 10.2 Hz, 1H), 3.53 (dd, *J* = 11.4, 5.4 Hz, 1H), 2.36–2.29 (m, 1H), 2.13–2.05 (m, 1H), 1.80–1.71 (m, 1H), 1.03 (s, 9 H), 0.58 (d, *J* = 6.6 Hz, 3H); <sup>13</sup>C NMR (C<sub>6</sub>D<sub>6</sub>, 150 MHz)  $\delta$  162.1, 144.2, 143.7, 143.6, 143.55, 143.48, 141.84, 141.79, 141.760, 141.755, 136.13, 136.10, 133.6, 133.1, 130.5, 130.44, 130.38, 127.5, 127.41, 127.36, 125.50, 125.45, 125.43, 125.36, 122.5, 120.31, 120.26, 120.2, 80.6, 69.49, 69.45, 69.42, 69.38, 65.0, 63.9, 48.39, 48.34, 48.30, 48.25, 39.11, 39.09, 36.5, 36.4, 30.2, 26.9, 19.5, 8.6; <sup>31</sup>P NMR (C<sub>6</sub>D<sub>6</sub> 160 MHz)  $\delta$  -1.7; IR (film)  $\nu_{\max}$  3433, 1727, 987 cm<sup>-1</sup>; HRMS (ESI-TOF) calcd for C<sub>56</sub>H<sub>57</sub>O<sub>8</sub>PSi + H<sup>+</sup> 917.3633; found 917.3630.

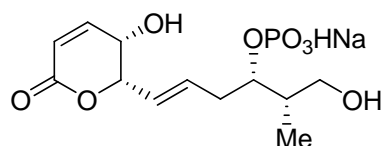

**Sodium (2S,3S,E)-1-Hydroxy-6-((2S,3S)-3-hydroxy-6-oxo-3,6-dihydro-2H-pyran-2-yl)-2-methylhex-5-en-3-yl Hydrogenphosphate (58).** Prepared from **56** in 84% yield (over 2 steps, 2.1 mg) according to the same procedure used to synthesize **55**. The crude product was purified by flash chromatography (C<sub>18</sub> reverse phase SiO<sub>2</sub>, H<sub>2</sub>O) giving **58** as a white solid:  $[\alpha]_D^{25} +48$  (*c* 0.40, MeOH); <sup>1</sup>H NMR (CD<sub>3</sub>OD, 600 MHz)  $\delta$  7.04 (dd, *J* = 9.6, 5.4 Hz, 1H), 6.06 (d, *J* = 9.6 Hz, 1H), 5.95 (dt, *J* = 15.6, 7.8 Hz, 1H), 5.82 (dd, *J* = 15.6, 7.8 Hz, 1H), 4.86 (dd, *J* = 7.8, 3.0 Hz, 1H), 4.41 (dddd, *J* = 9.6, 7.2, 7.2, 2.4 Hz, 1H), 4.22 (dd, *J* = 5.4, 3.0 Hz, 1H), 3.64 (dd, *J* = 11.4, 9.6 Hz, 1H), 3.41 (dd, *J* = 11.4, 5.4 Hz, 1H), 2.62–2.55 (m, 1H), 2.41–2.33 (m, 1H), 1.86–1.77 (m, 1H), 0.86 (d, *J* = 6.6 Hz, 3H); <sup>13</sup>C NMR (CD<sub>3</sub>OD, 150 MHz)  $\delta$  166.3, 147.4, 134.0, 127.8, 122.7, 83.5, 74.7, 74.6, 65.2, 63.7, 40.22, 40.20, 37.84, 37.82, 9.8; <sup>31</sup>P NMR (CD<sub>3</sub>OD 160 MHz)  $\delta$  3.5; IR (film)  $\nu_{\max}$  3373, 1715, 1033 cm<sup>-1</sup>; HRMS (ESI-TOF) calcd for C<sub>12</sub>H<sub>19</sub>O<sub>8</sub>P + H<sup>+</sup> 323.0890; found 323.0877.

**Phosphatase Inhibition Assays.** Protein phosphatase activity against phosphohistone was measured by the quantification of [<sup>32</sup>P] liberated from labeled phosphohistone according to established protocols (ref 1) with the following modifications. Dephosphorylation reactions were performed in 40  $\mu$ L total volumes for 10 min at 37°C in the following buffer: 100 mM MOPS pH 7, 0.1 mM EDTA, 0.1 mg/mL BSA, 0.1% (vol/vol) 2-mercaptoethanol. Reactions also contained either 2  $\mu$ L of DMF or DMF + inhibitor. Assays with recombinant PP1 contained 1 mM manganese (II) chloride. Reactions were stopped by the addition of 50  $\mu$ L of acid (1 N H<sub>2</sub>SO<sub>4</sub>) containing 1 mM K<sub>2</sub>HPO<sub>4</sub> (H<sub>3</sub>PO<sub>4</sub> at pH 1) and 10  $\mu$ L of ammonium molybdate (7.5%

w/v in 1.4 N H<sub>2</sub>SO<sub>4</sub>). Orthophosphate (as phosphomolybdic acid) was extracted by adding 400 μL of isobutanol:methyl soyate (1:1, v/v) to each tube, vortexing for at least 5 sec (vortex set at maximum speed), then separating phases by centrifugation at 14,000 × G for 2 min. Aliquots of the organic phase (200 μL; 50% of extracted <sup>32</sup>P) were collected for scintillation counting.

Solvent CD3OD  
Spectrometer Frequency 600.13  
Nucleus 1H

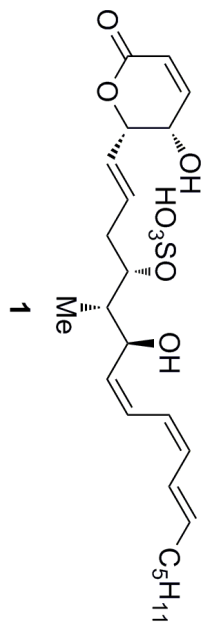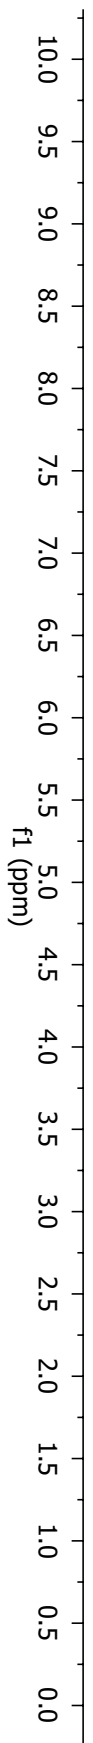



Solvent DMSO  
Spectrometer Frequency 600.13  
Nucleus <sup>1</sup>H

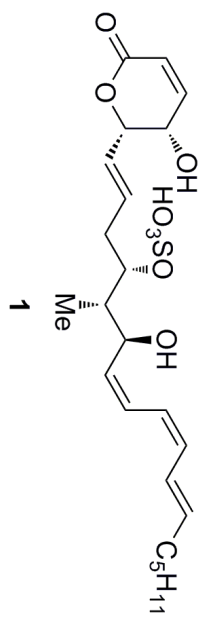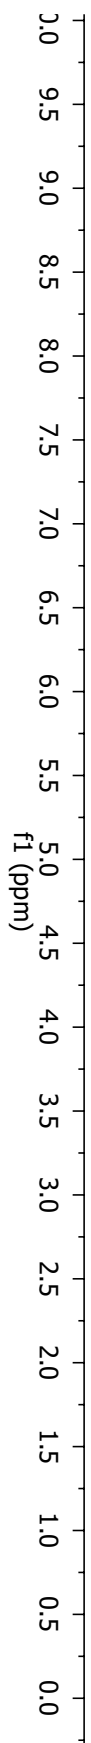

Solvent DMSO  
Spectrometer Frequency 150.90  
Nucleus <sup>13</sup>C

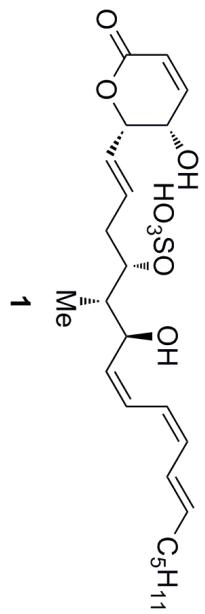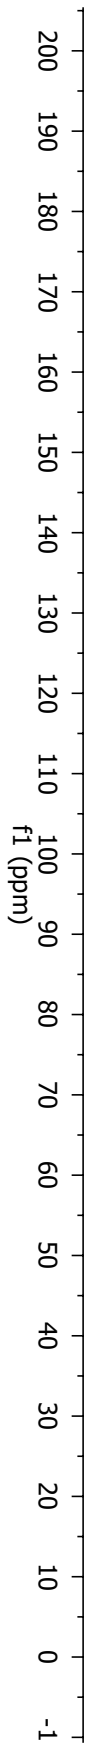

Solvent CD3OD  
Spectrometer Frequency 600.13  
Nucleus 1H

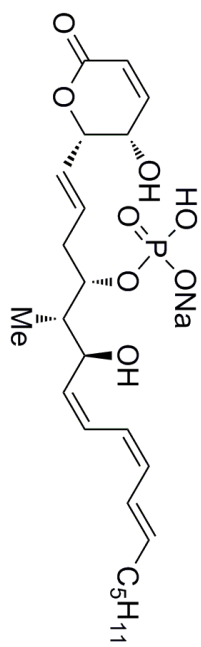

natural 2

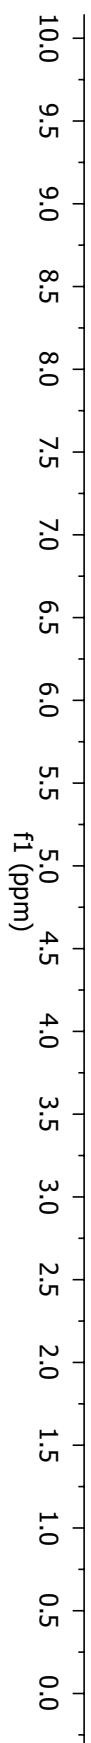

Solvent CD3OD  
Spectrometer Frequency 600.13  
Nucleus <sup>1</sup>H

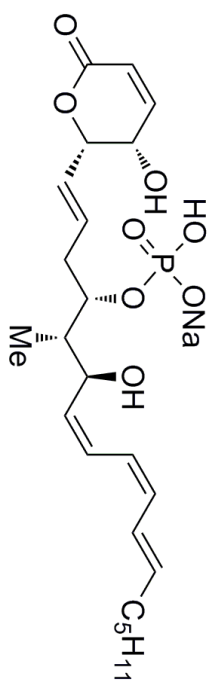

synthetic 2

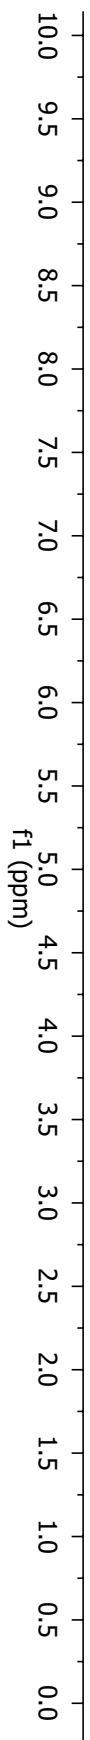

Solvent CD3OD  
Spectrometer Frequency 150.90  
Nucleus <sup>13</sup>C

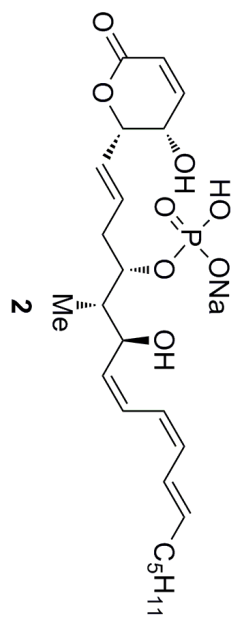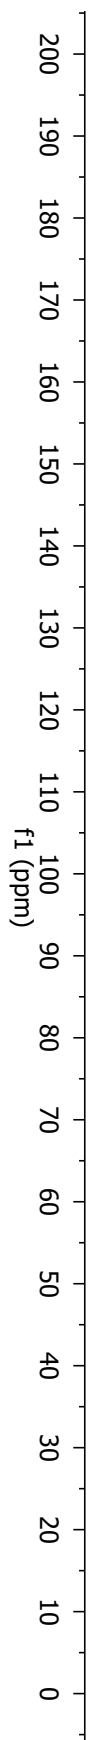

Solvent CD3OD  
Spectrometer Frequency 161.97  
Nucleus 31P

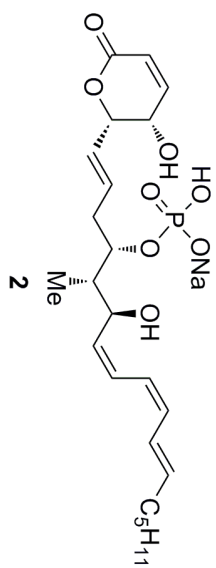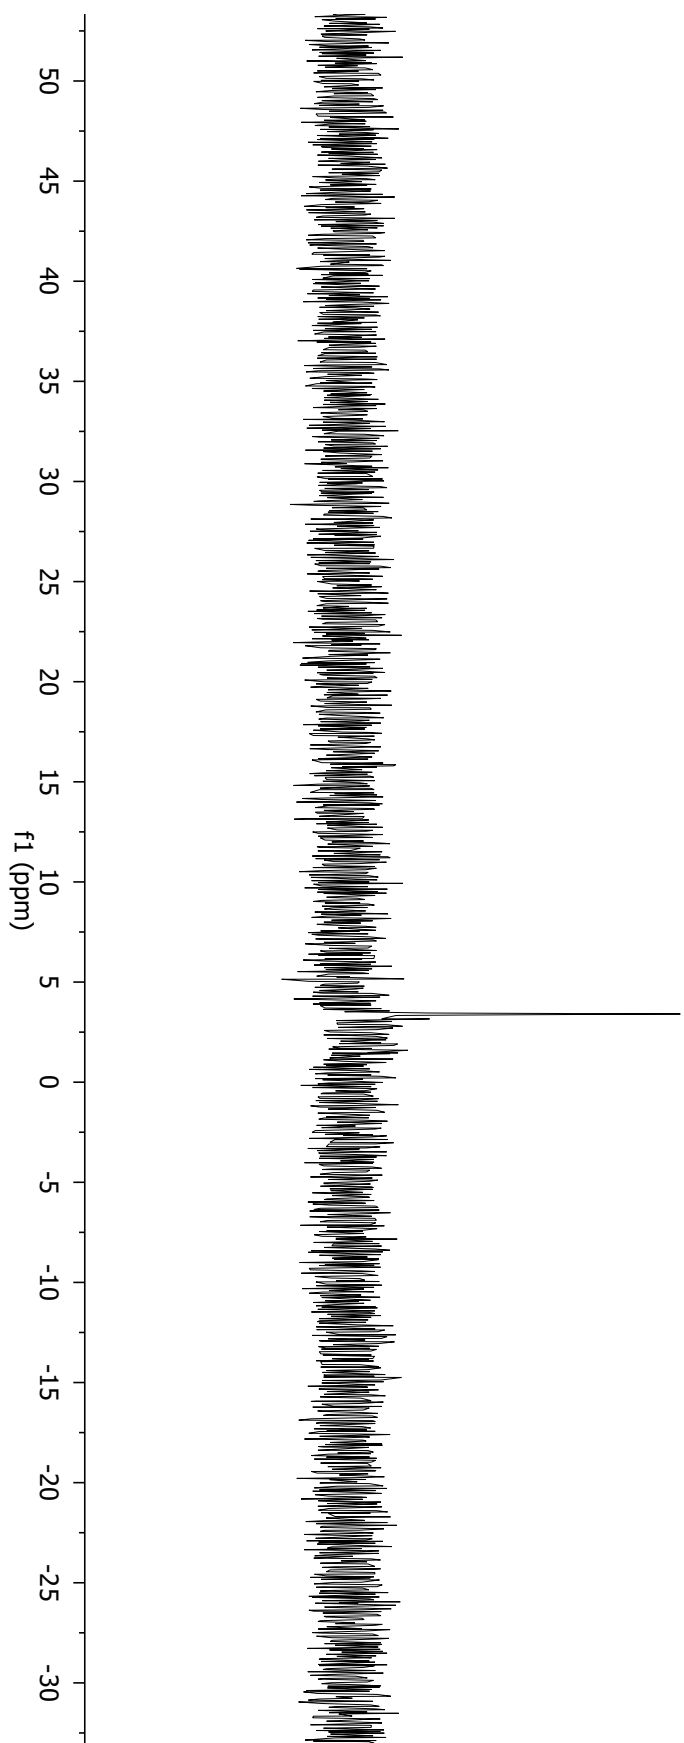

Solvent CD3OD  
Spectrometer Frequency 600.13  
Nucleus <sup>1</sup>H

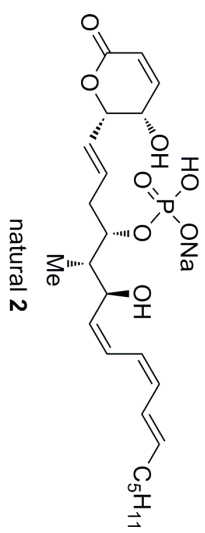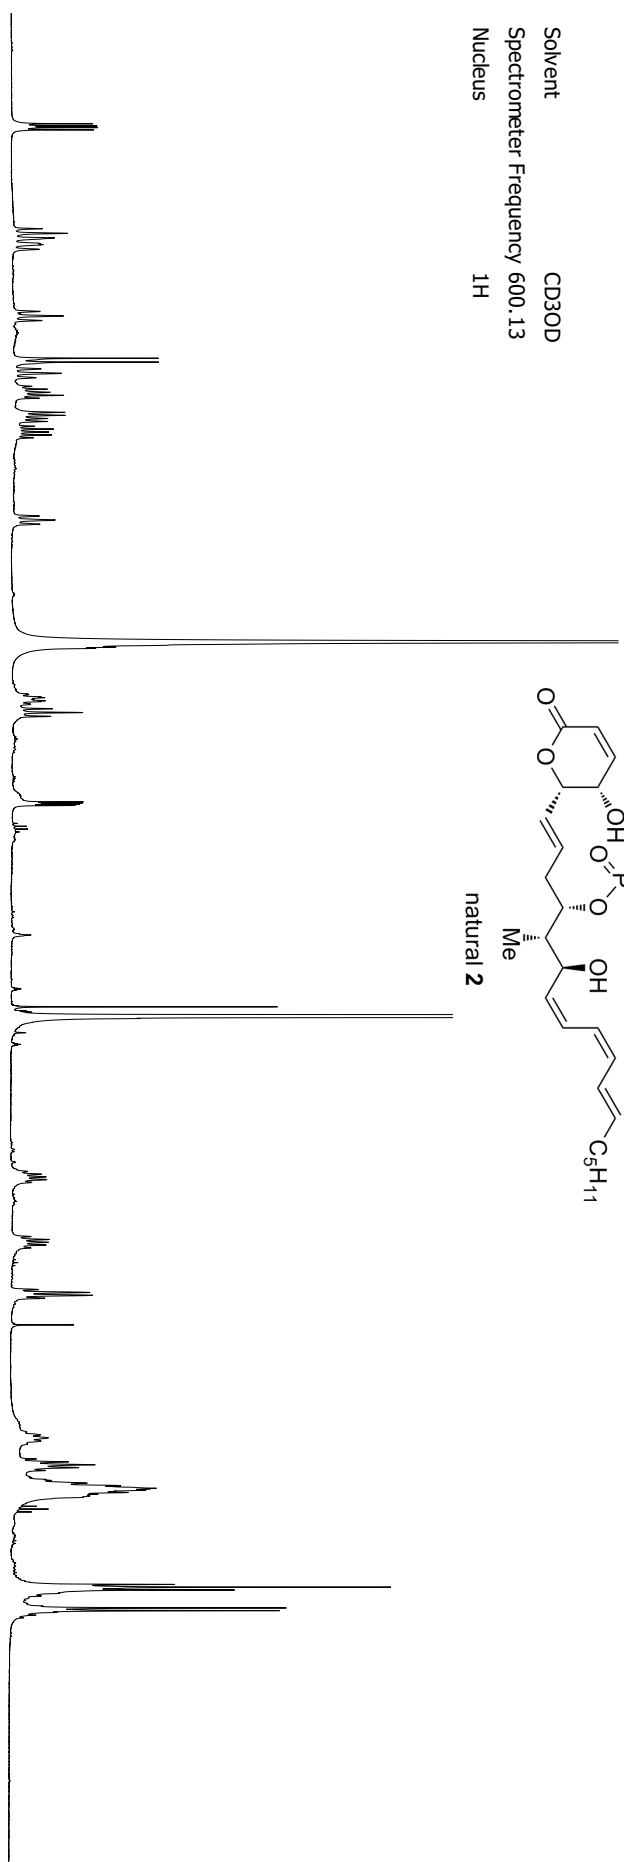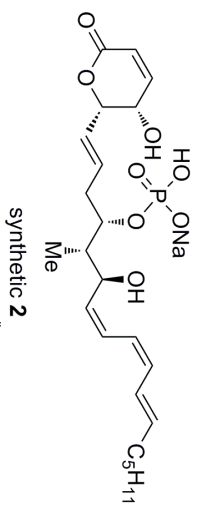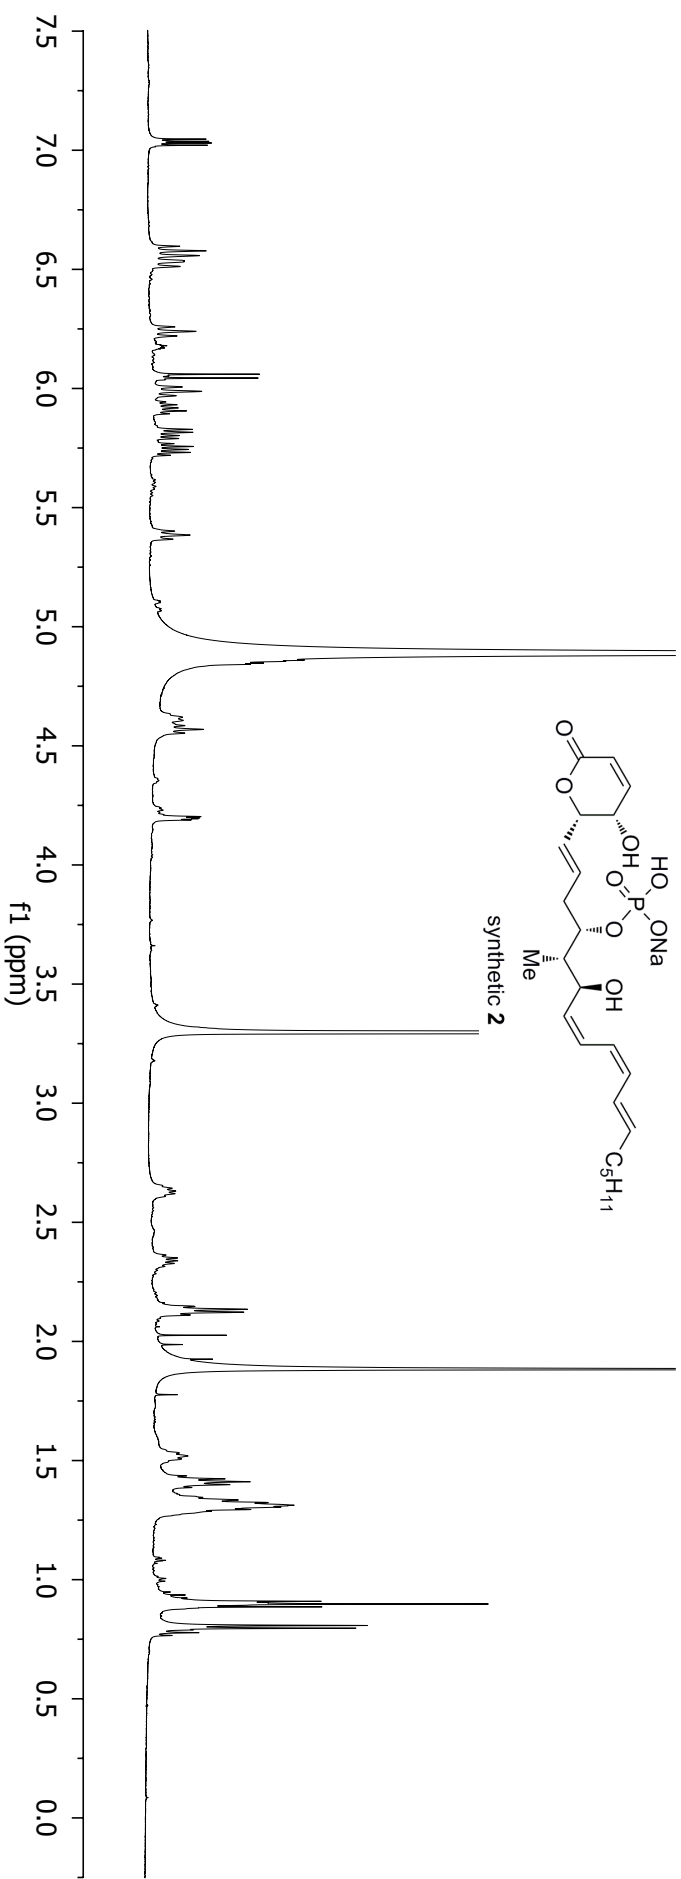

Solvent CD3OD  
Spectrometer Frequency 600.13  
Nucleus 1H

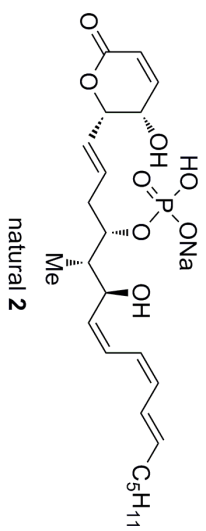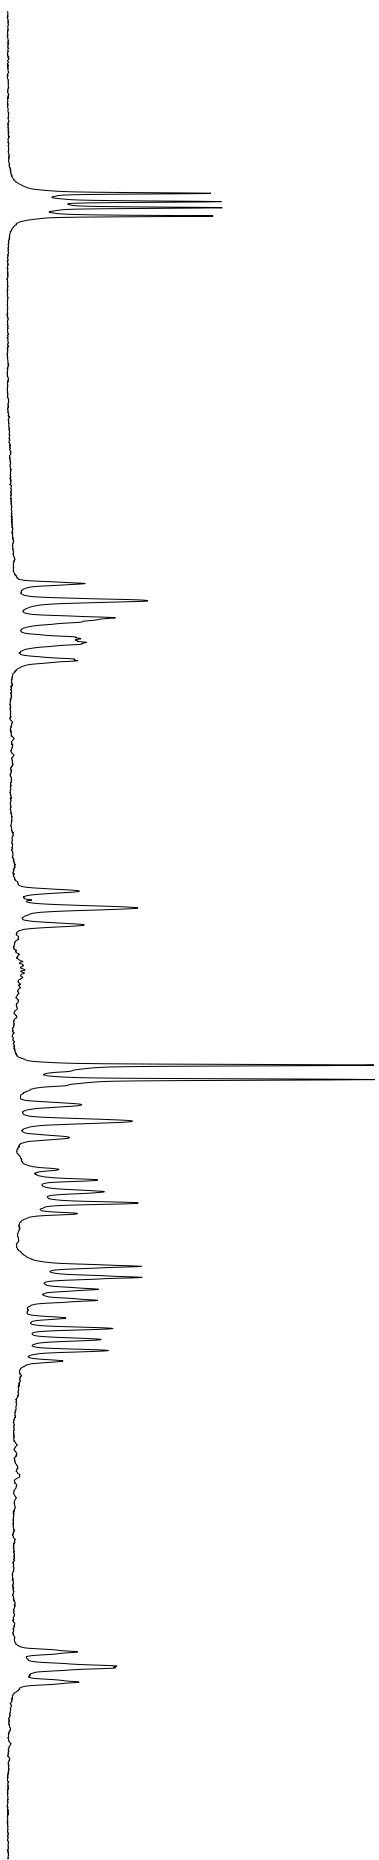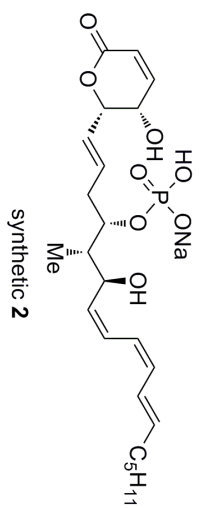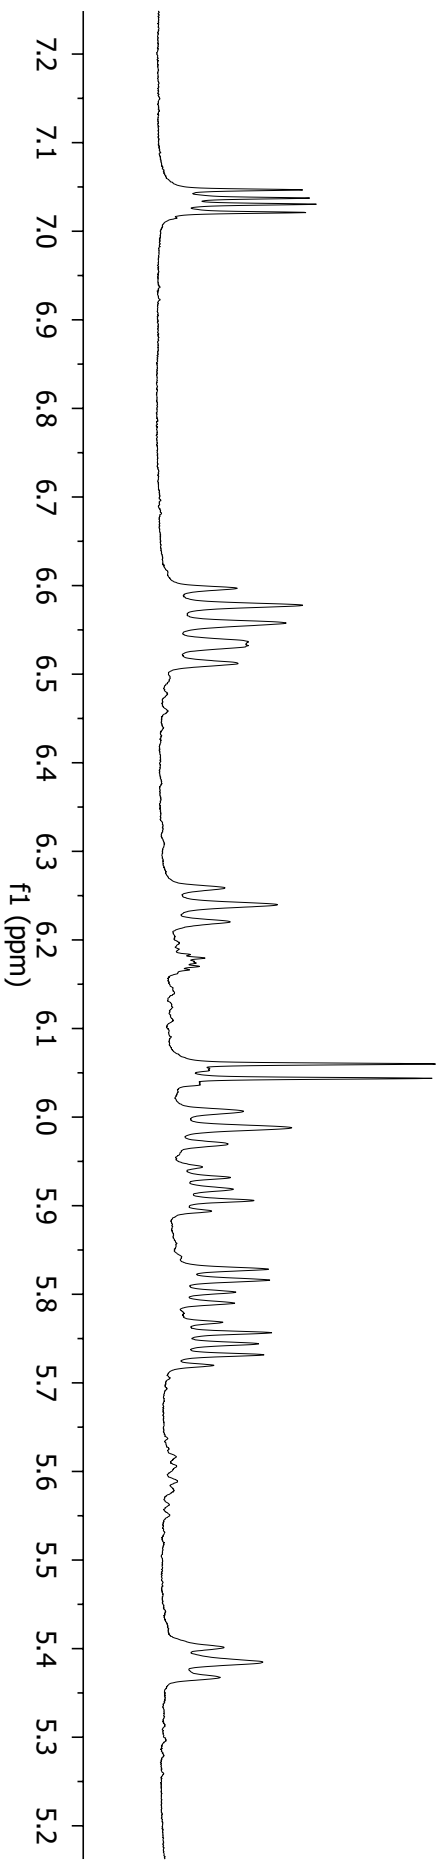



Solvent CD3OD  
Spectrometer Frequency 600.13  
Nucleus 1H

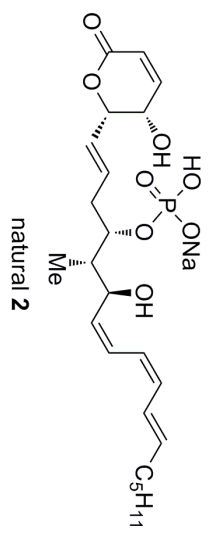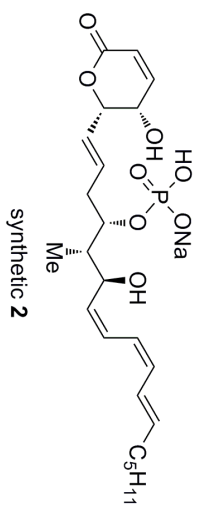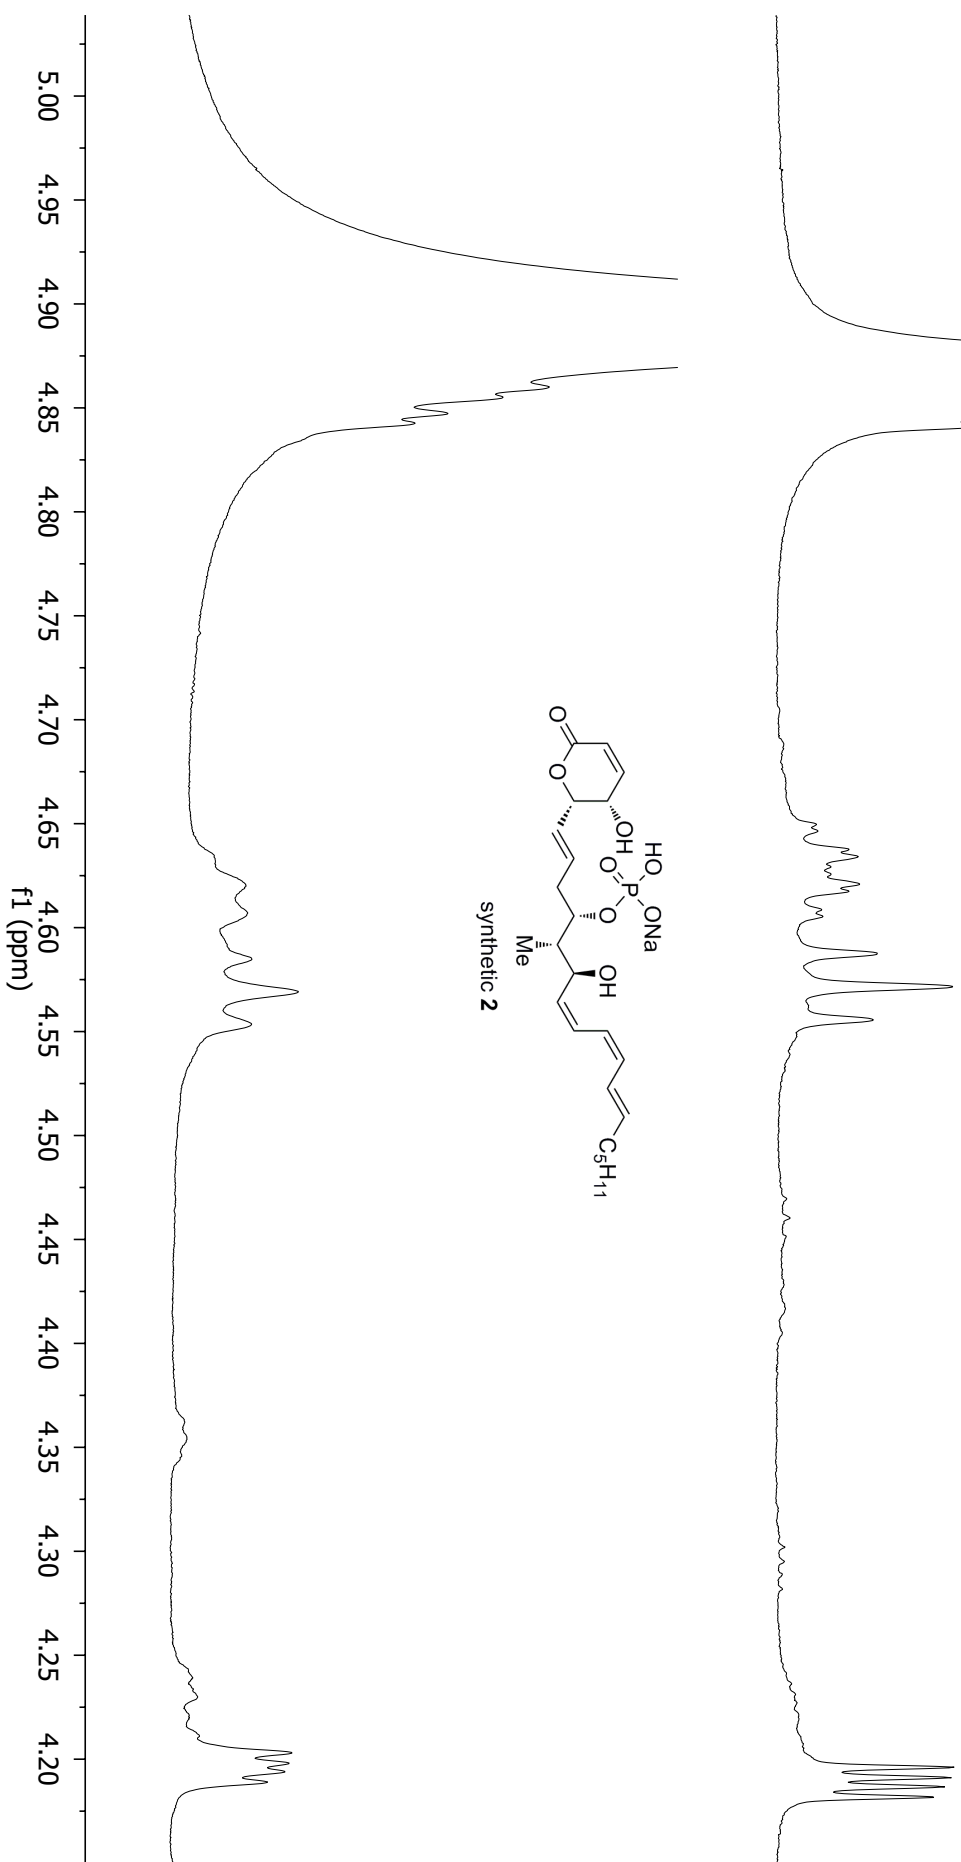

Solvent CD3OD  
Spectrometer Frequency 600.13  
Nucleus 1H

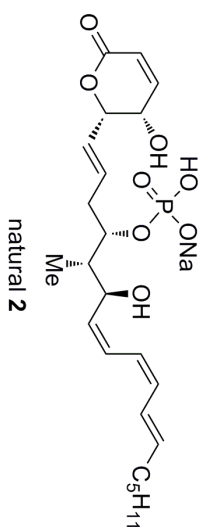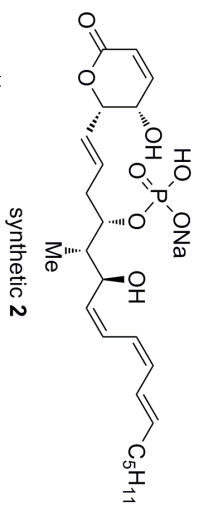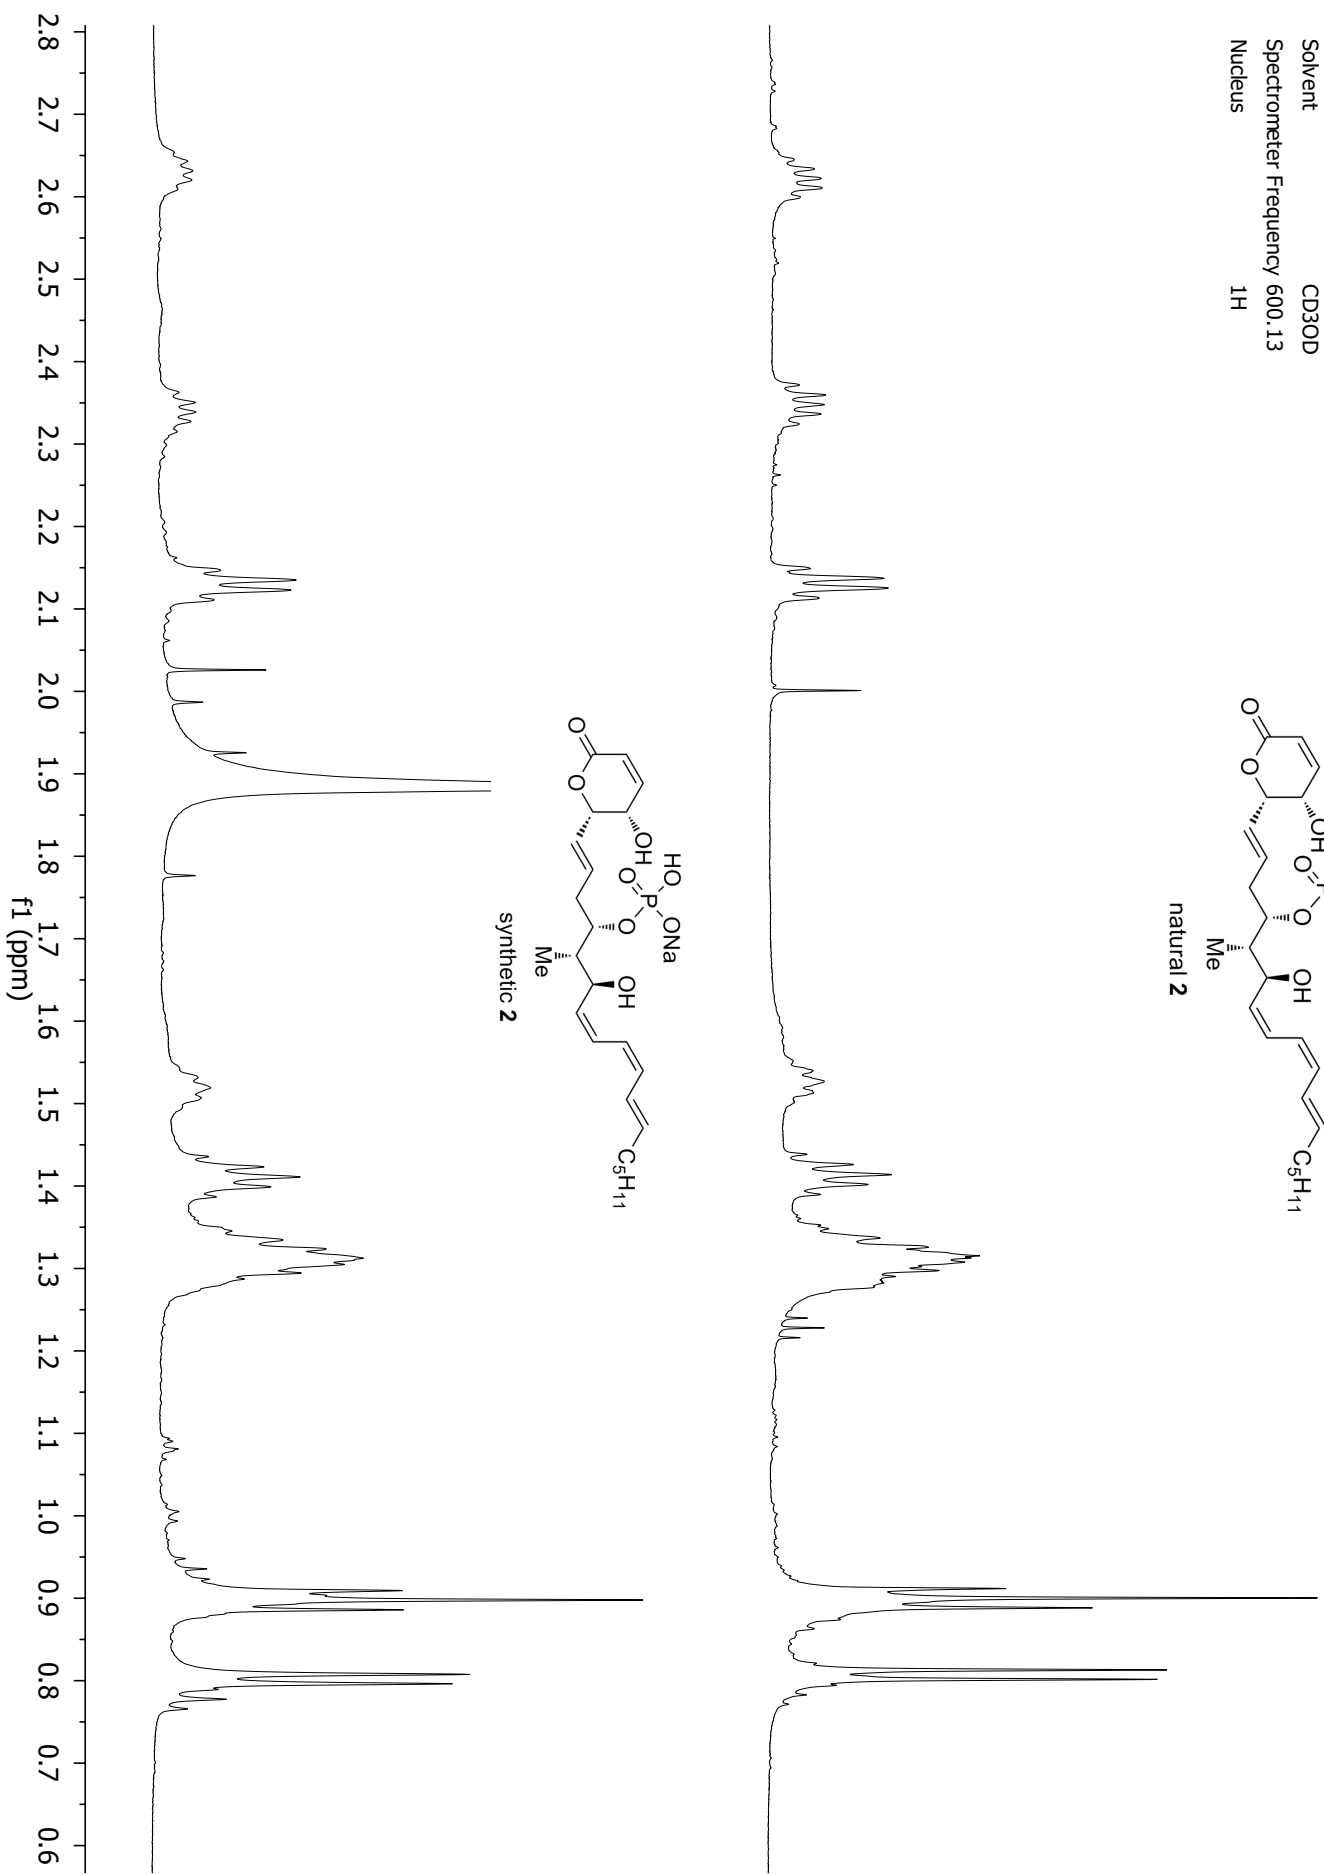

Solvent CD3OD  
Spectrometer Frequency 600.13  
Nucleus <sup>1</sup>H

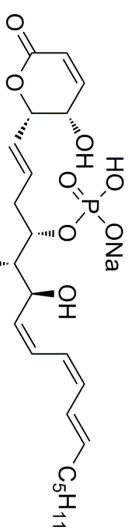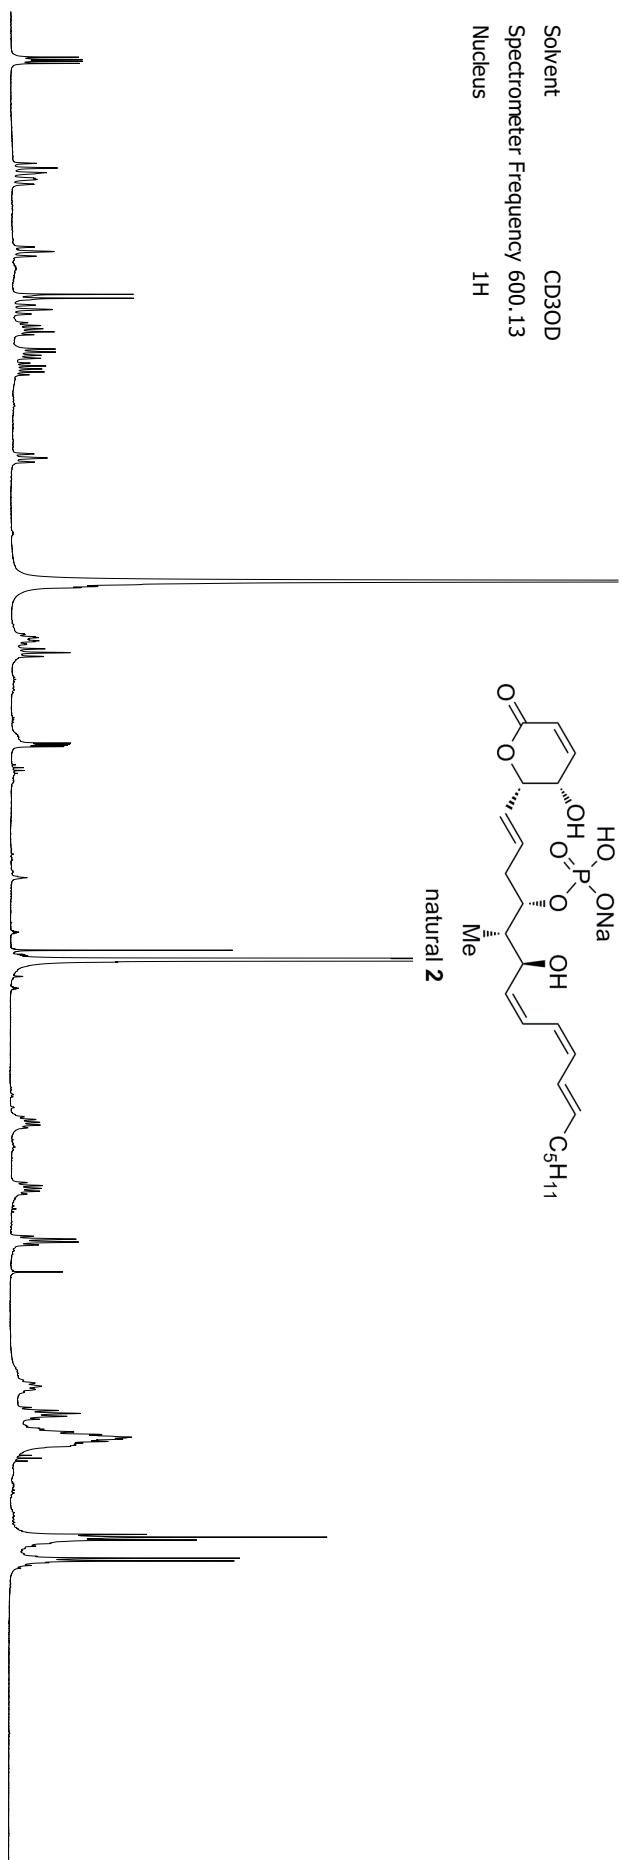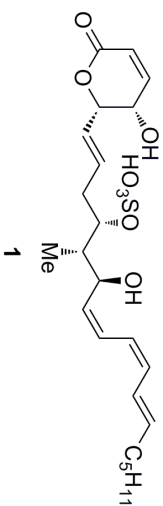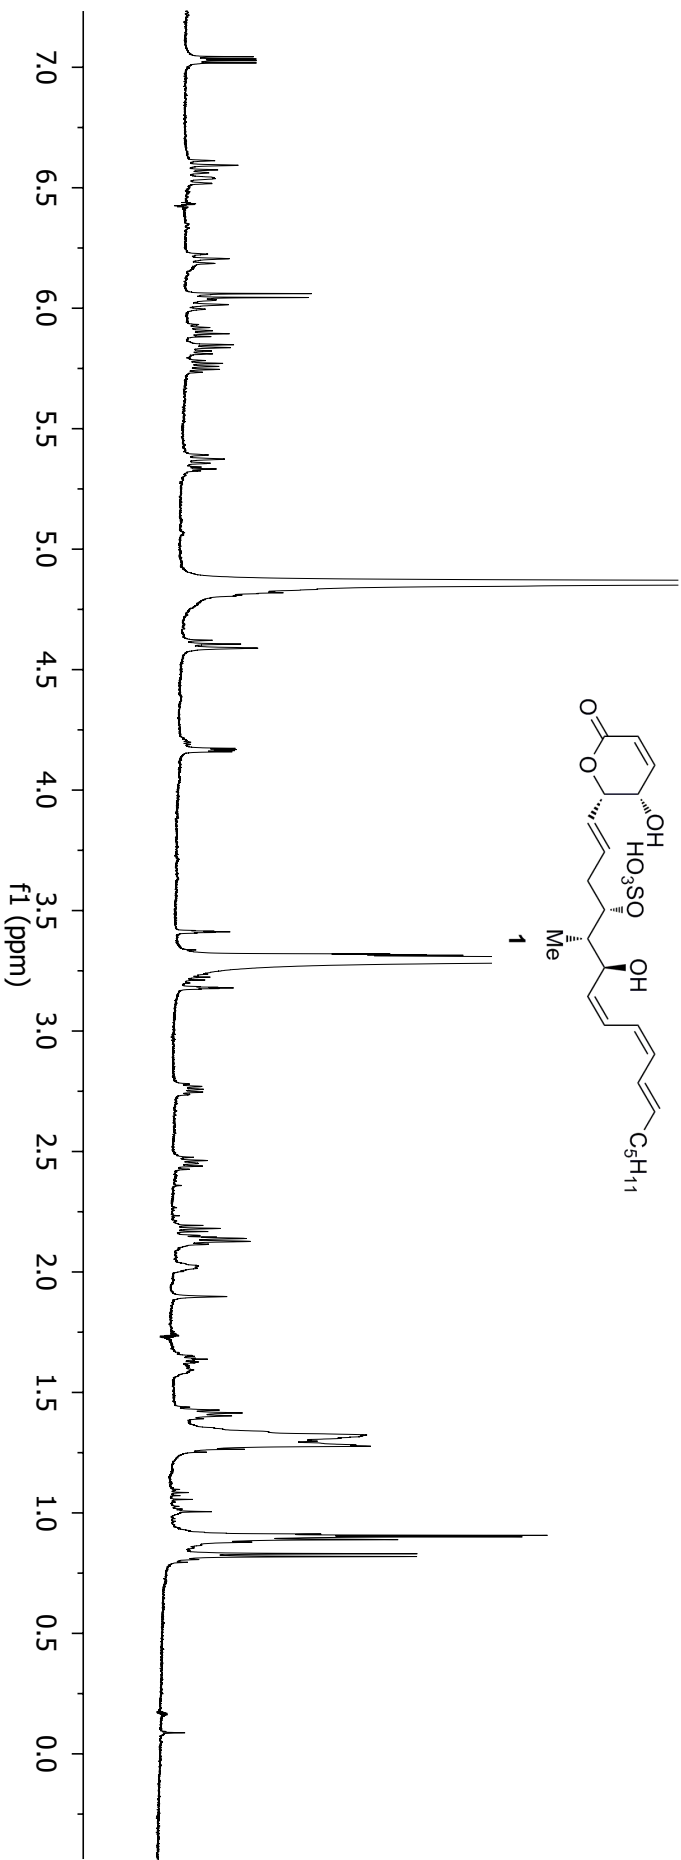

Solvent CD3OD  
Spectrometer Frequency 600.13  
Nucleus 1H

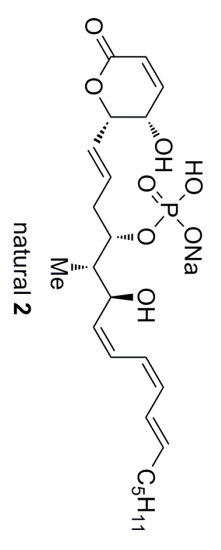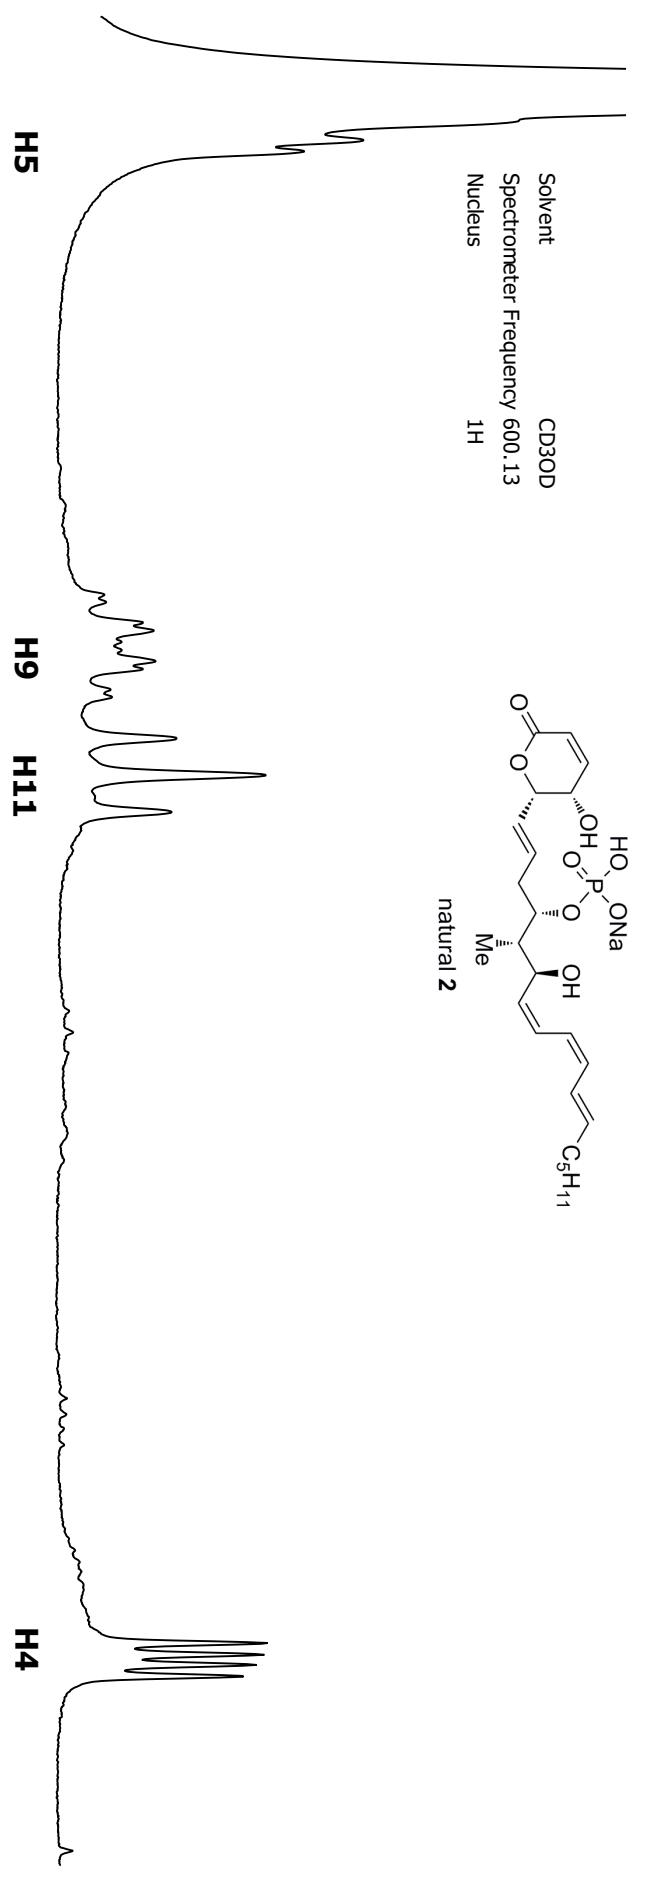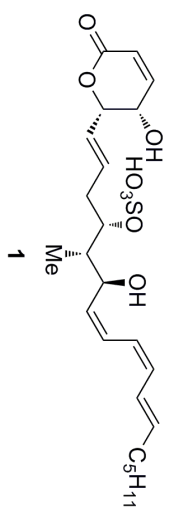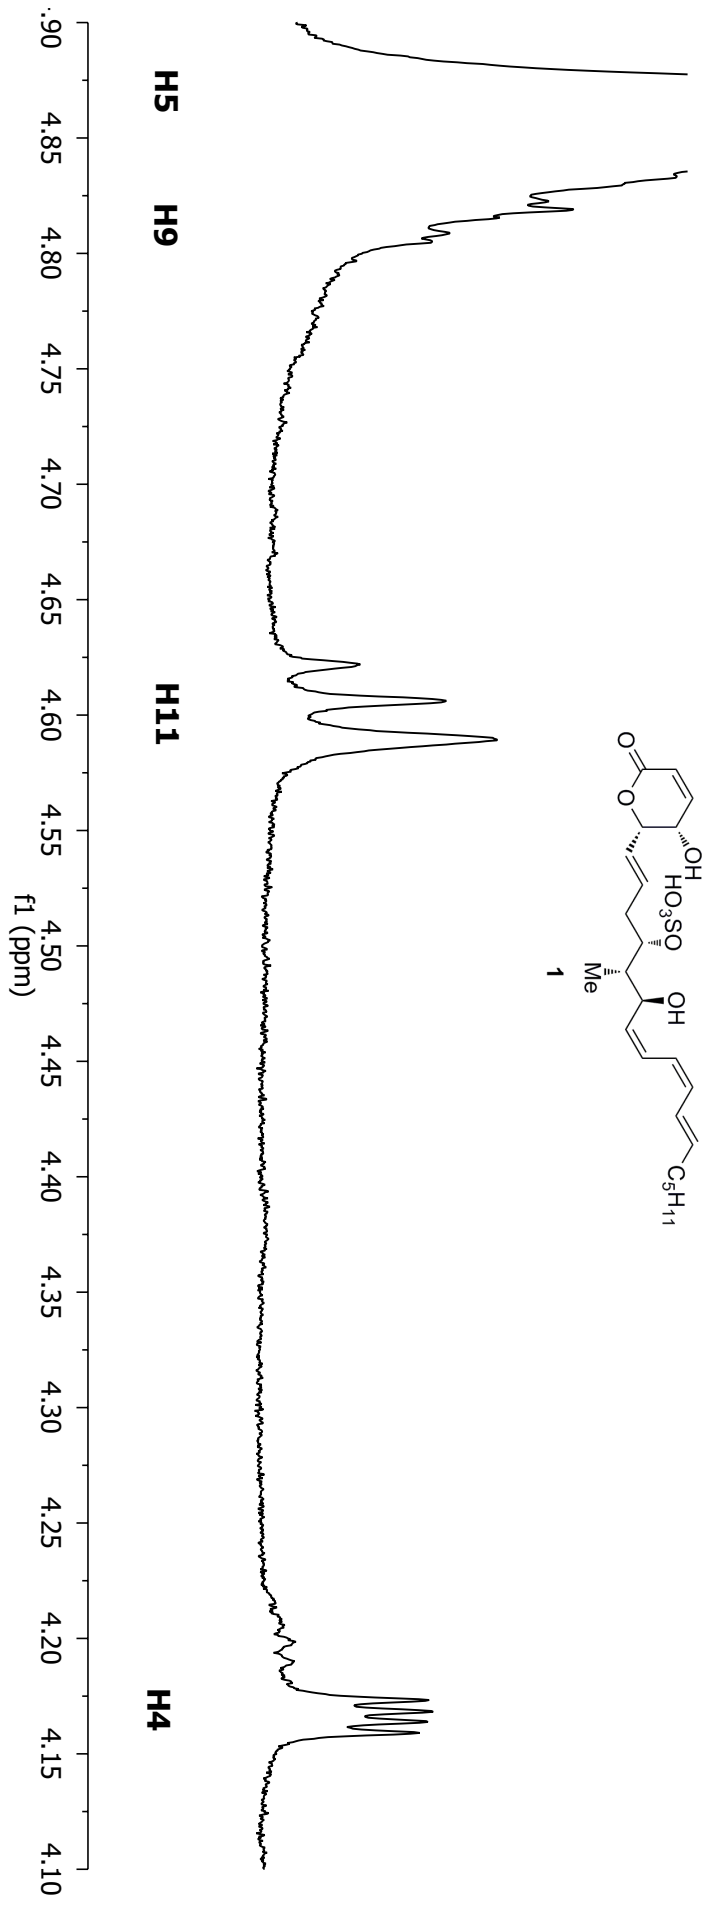

Solvent CD3OD  
Spectrometer Frequency 600.13  
Nucleus 1H

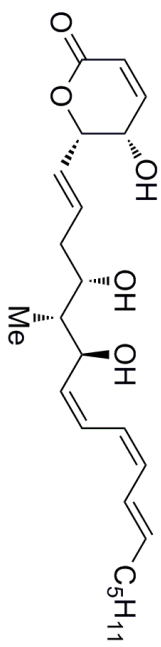

35

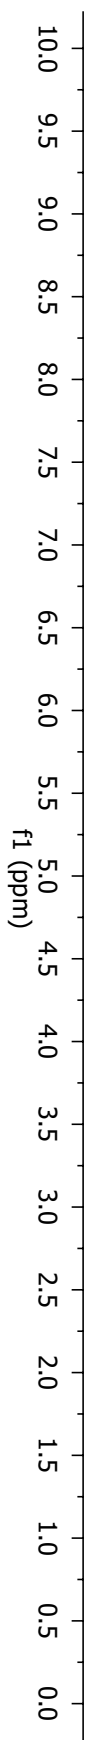

Solvent CD3OD  
Spectrometer Frequency 150.90  
Nucleus <sup>13</sup>C

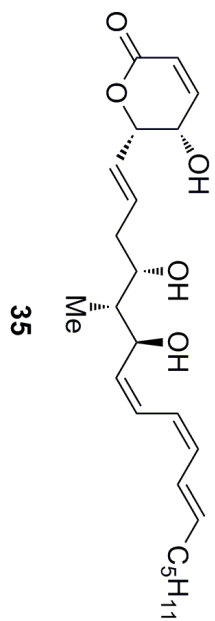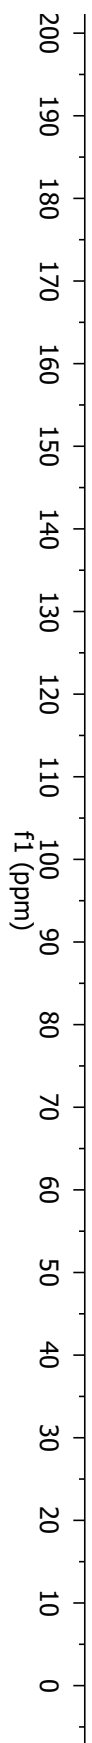

Solvent CD3CN  
Spectrometer Frequency 600.13  
Nucleus 1H

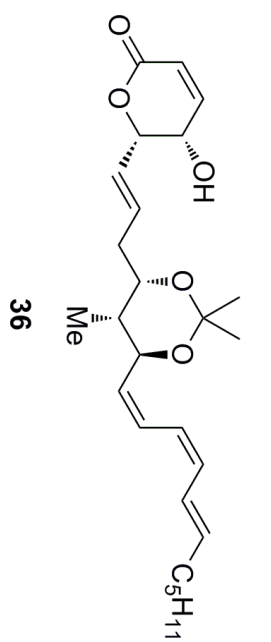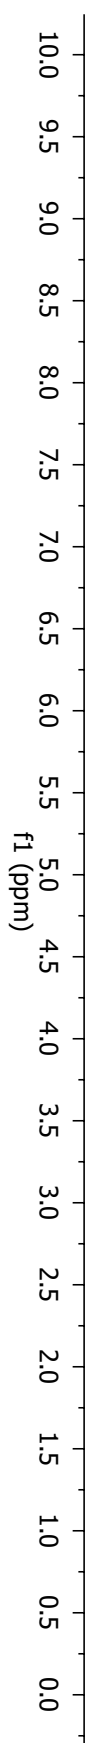





Solvent C6D6  
Spectrometer Frequency 500.13  
Nucleus 1H

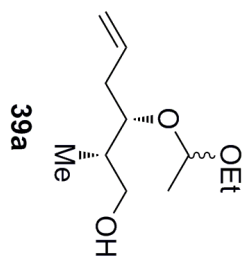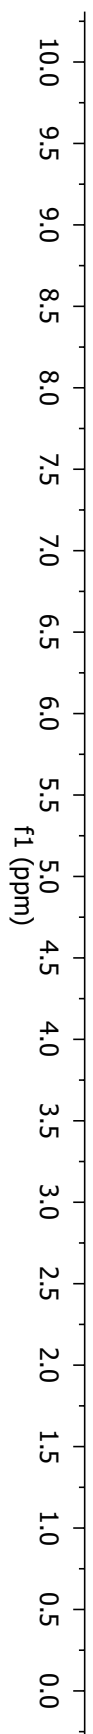

Solvent C6D6  
Spectrometer Frequency 125.77  
Nucleus <sup>13</sup>C

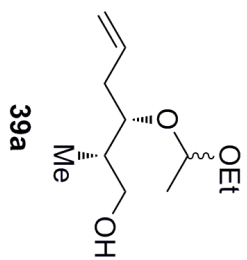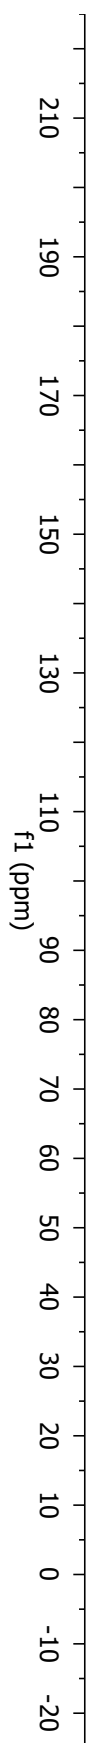

Solvent C6D6  
Spectrometer Frequency 500.13  
Nucleus 1H

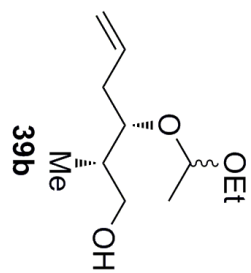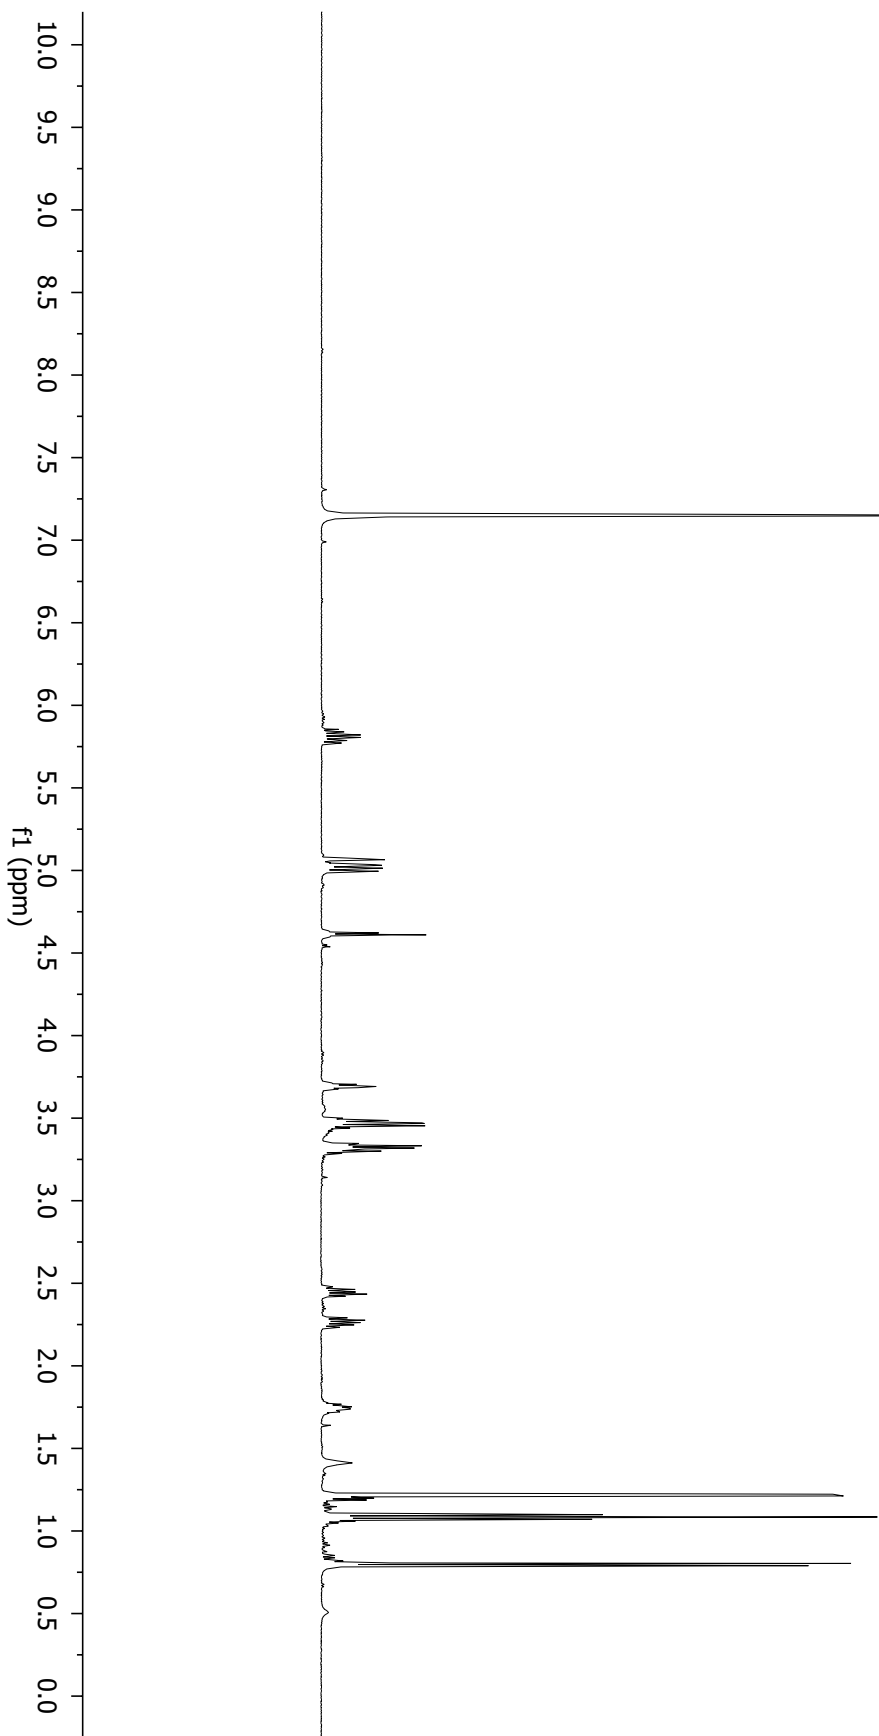

Solvent C6D6  
Spectrometer Frequency 125.76  
Nucleus 13C

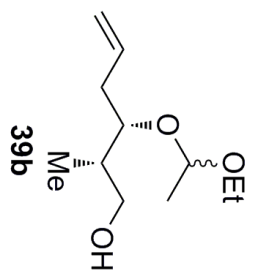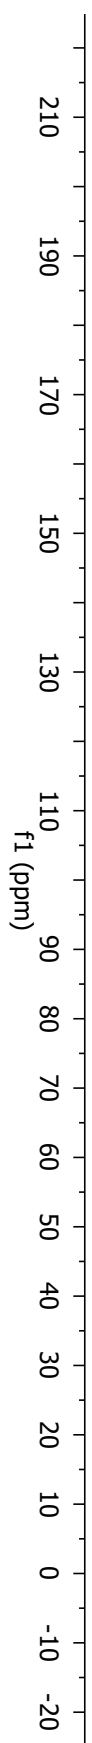

Solvent C6D6  
Spectrometer Frequency 500.13  
Nucleus 1H

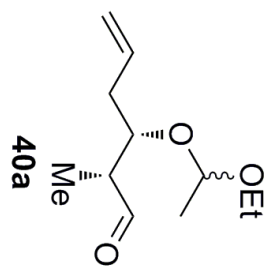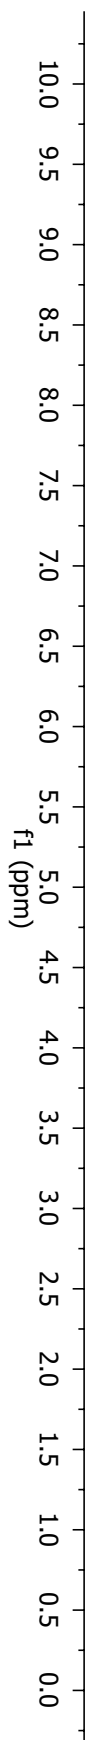

Solvent C6D6  
Spectrometer Frequency 125.76  
Nucleus <sup>13</sup>C

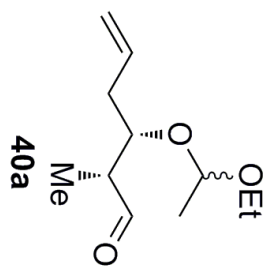

Solvent C6D6  
Spectrometer Frequency 400.12  
Nucleus 1H

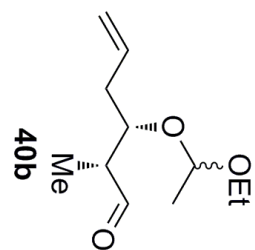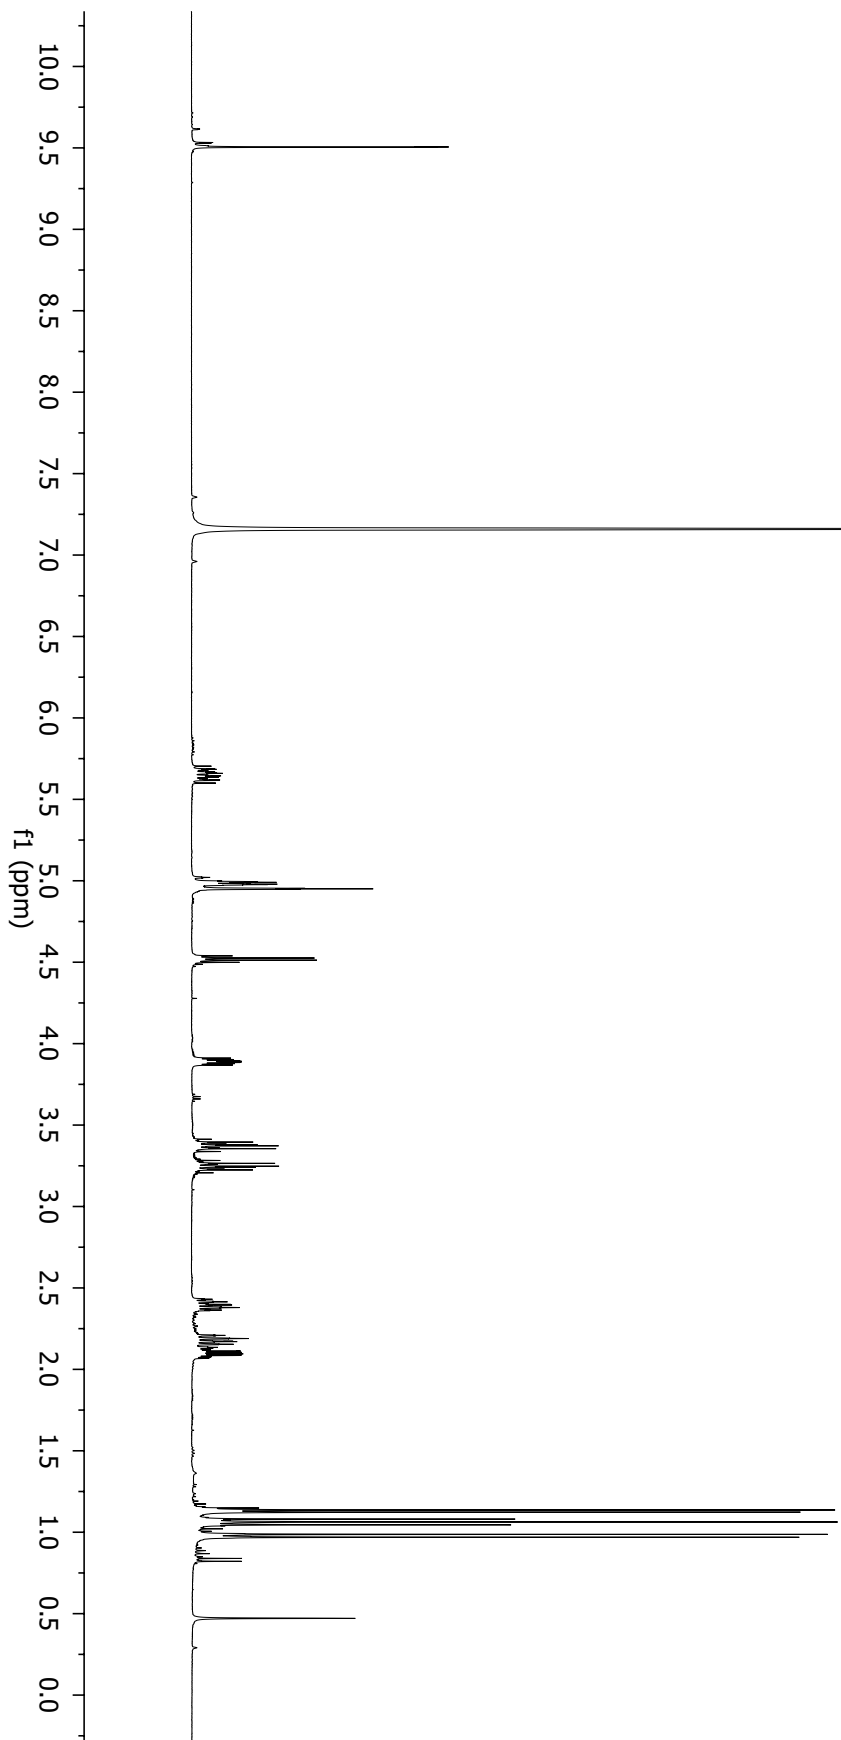

Solvent C6D6  
Spectrometer Frequency 100.61  
Nucleus <sup>13</sup>C

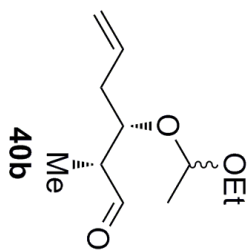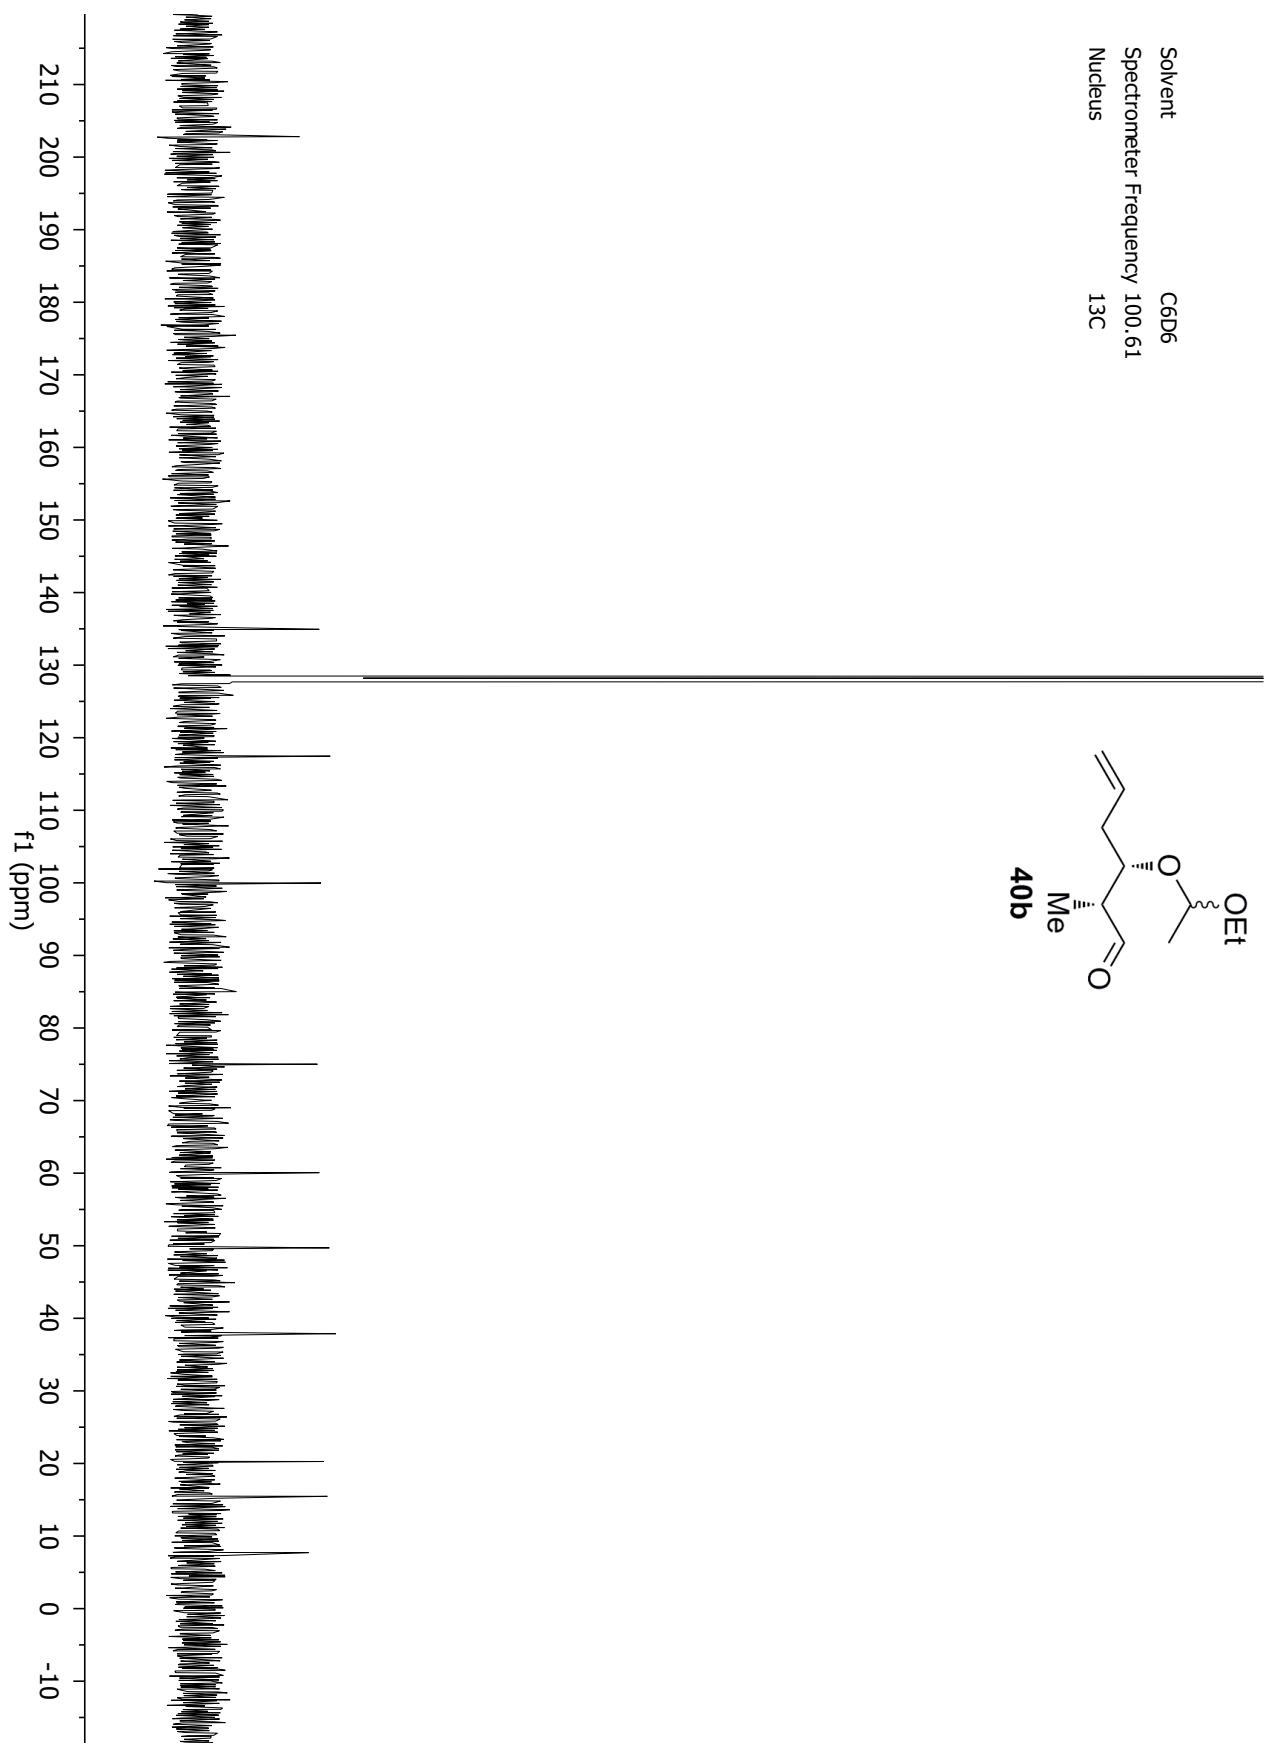



Solvent C6D6  
Spectrometer Frequency 500.13  
Nucleus 1H

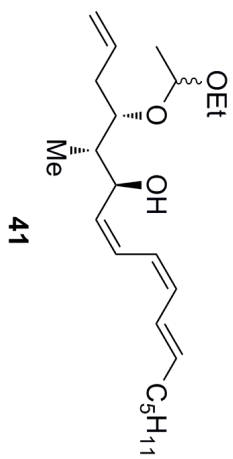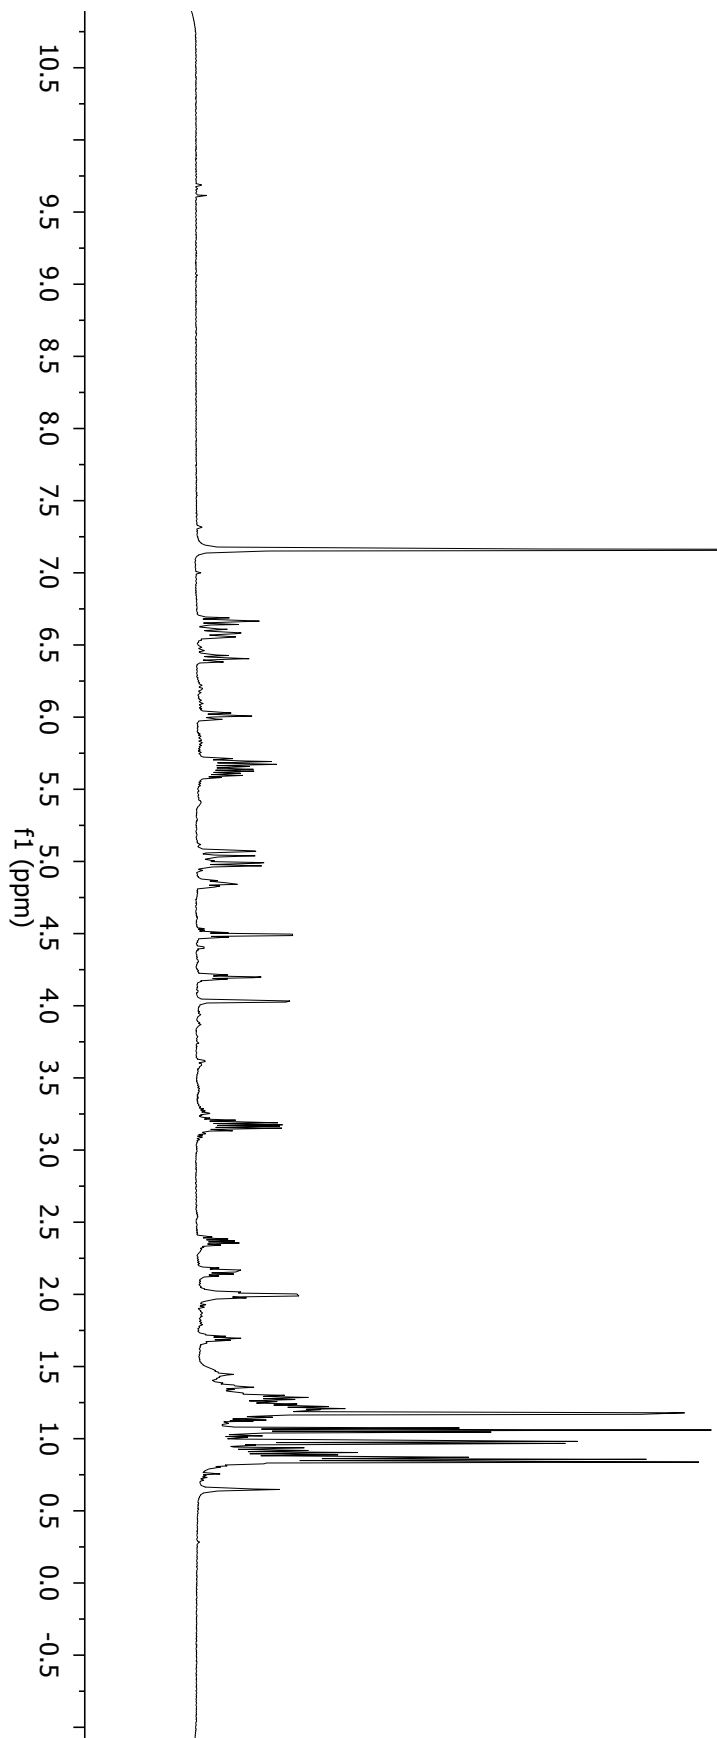

Solvent C6D6  
Spectrometer Frequency 125.77  
Nucleus 13C

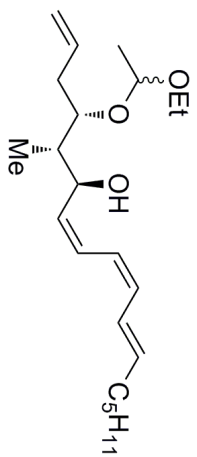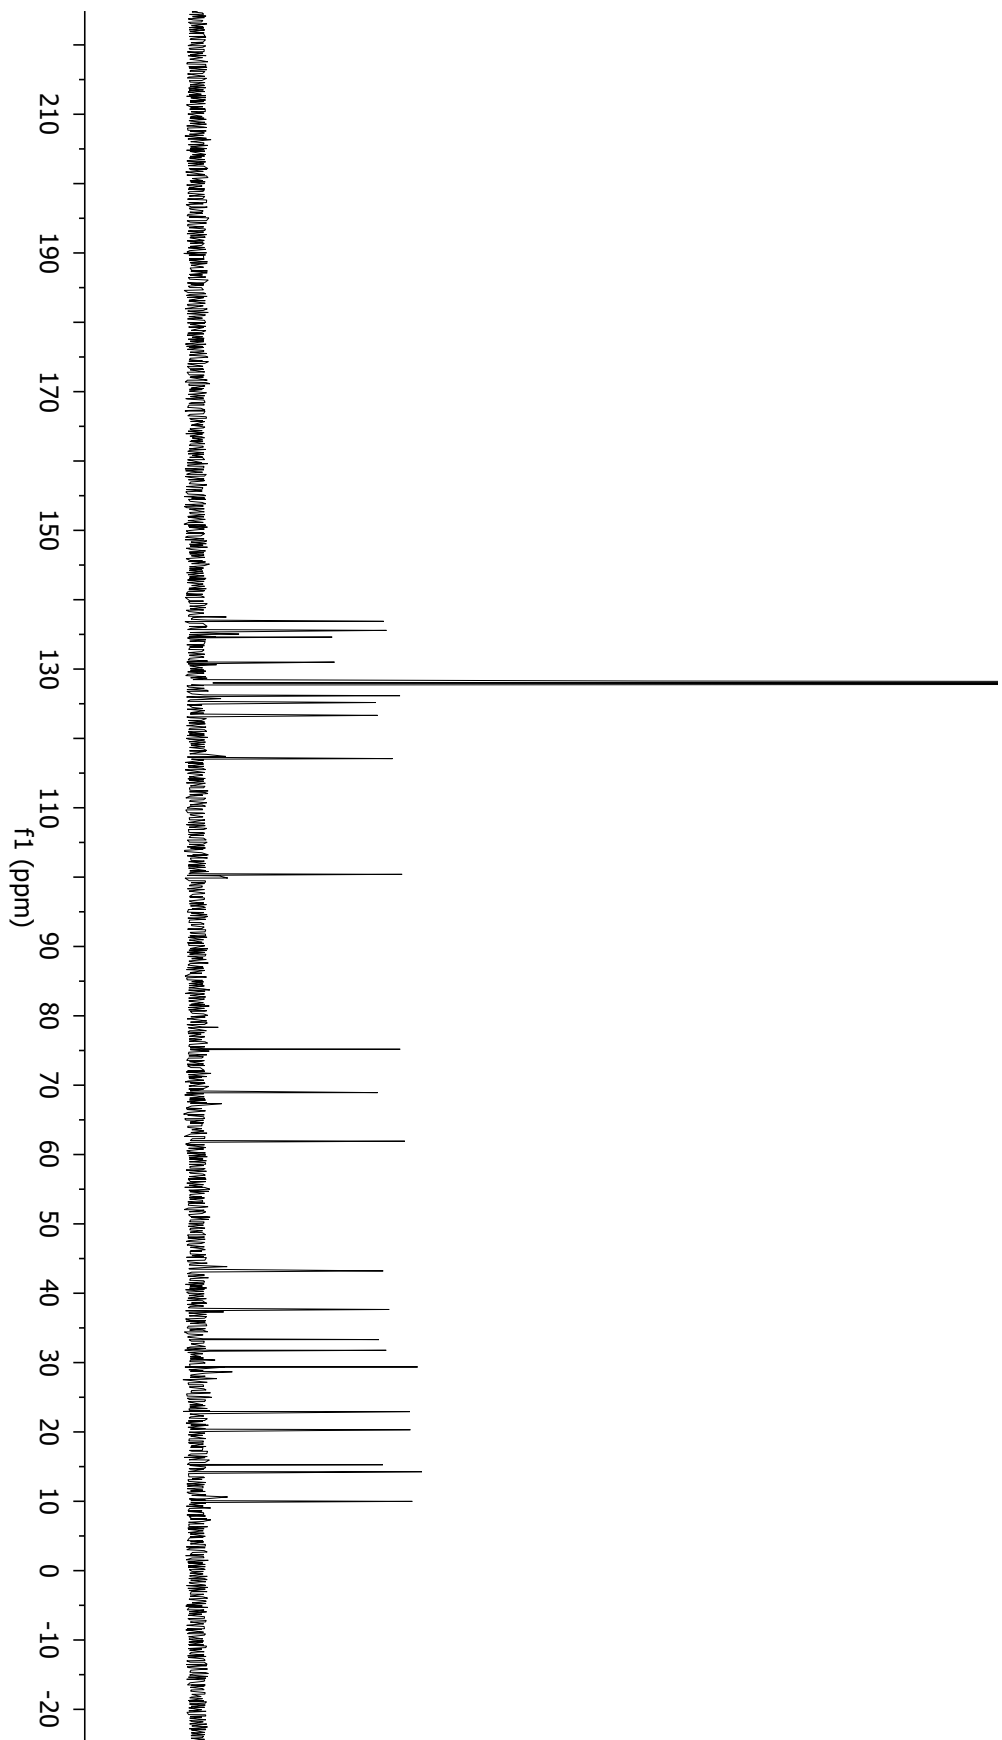

Solvent C6D6  
Spectrometer Frequency 500.13  
Nucleus 1H

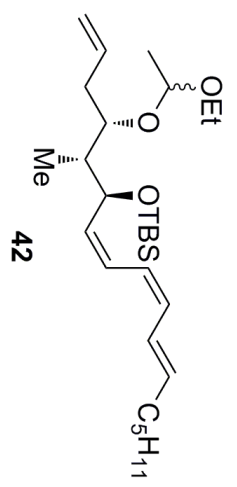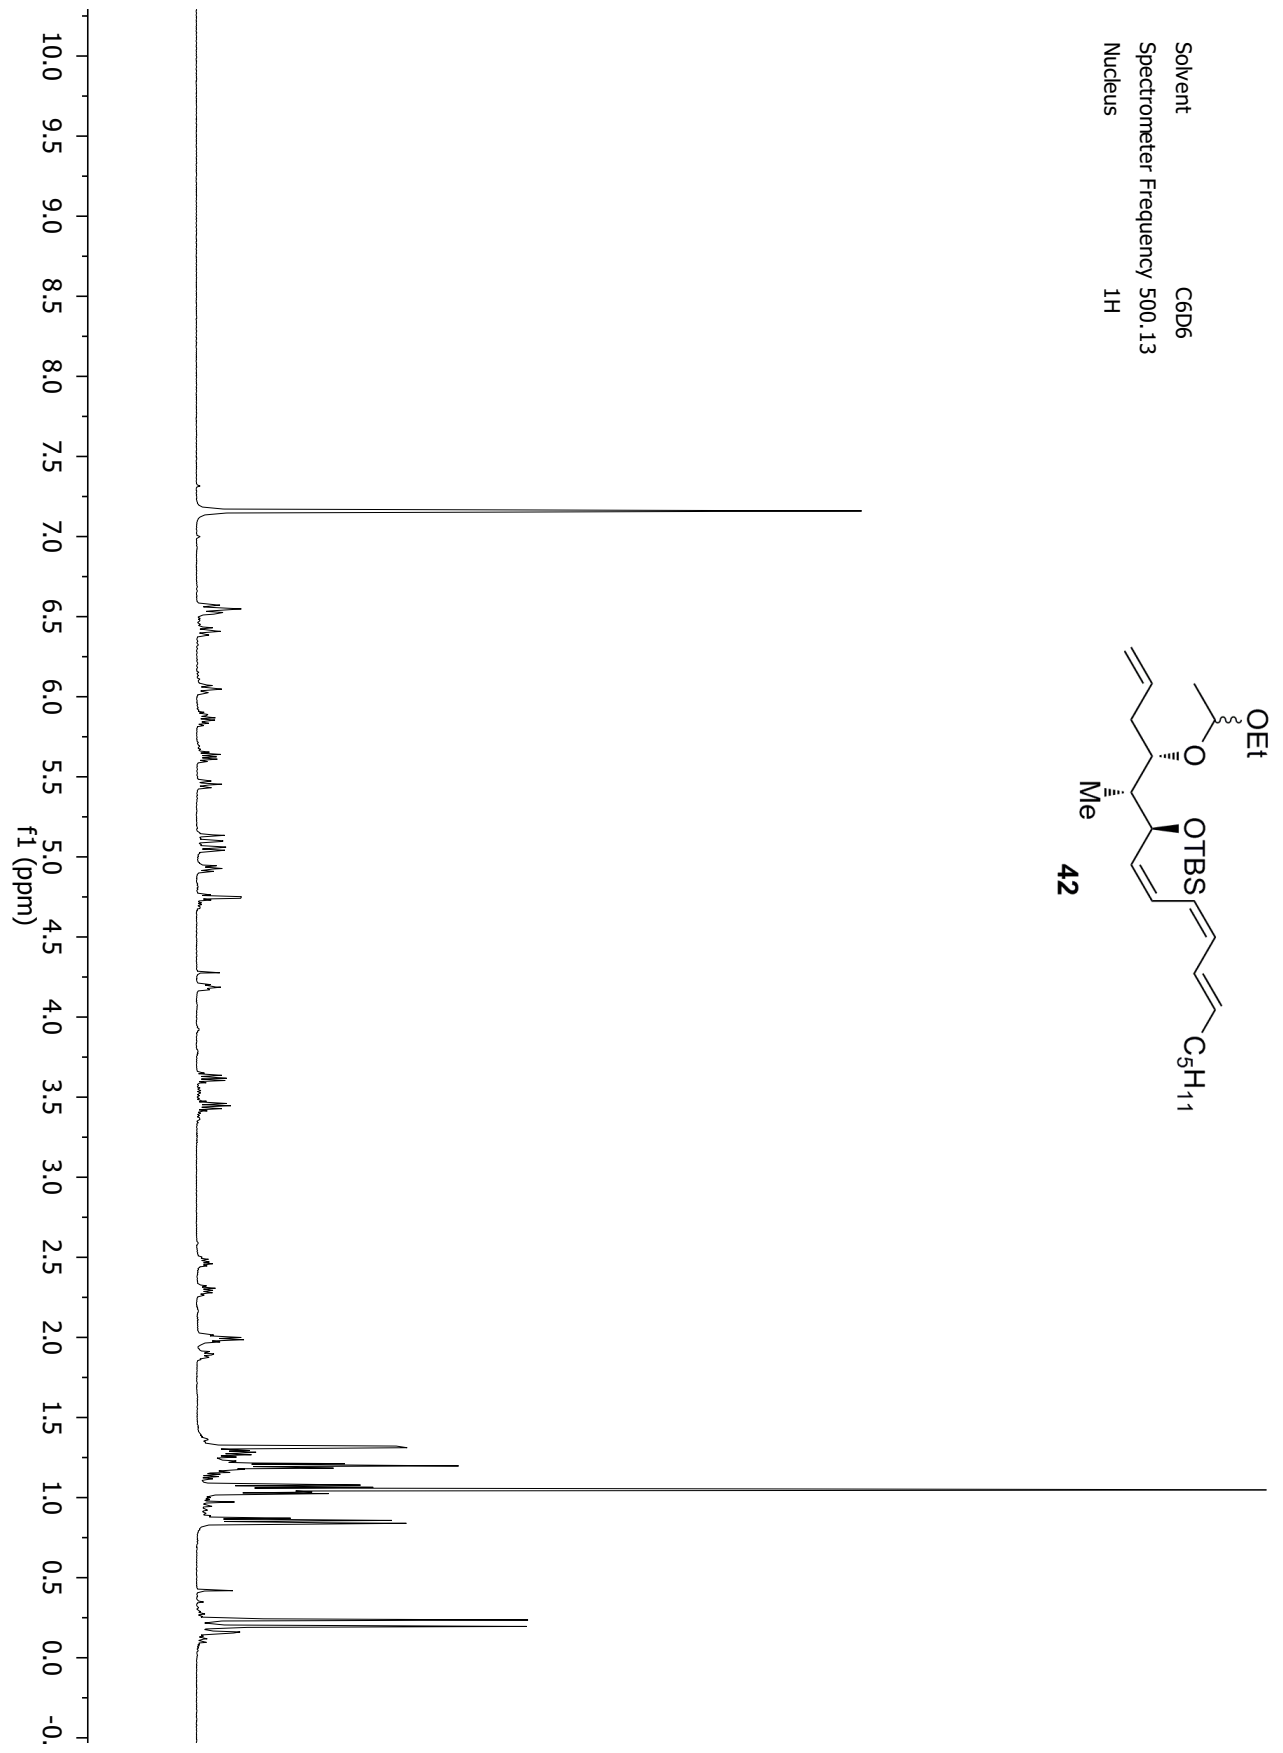

Solvent C6D6  
Spectrometer Frequency 125.76  
Nucleus <sup>13</sup>C

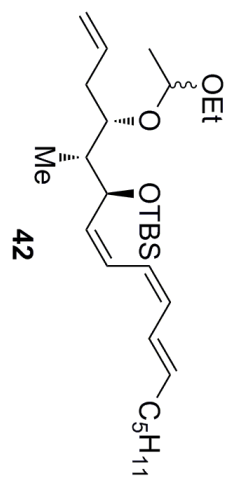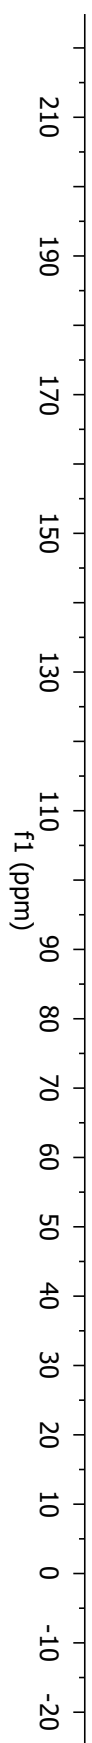

Solvent C6D6  
Spectrometer Frequency 500.13  
Nucleus 1H

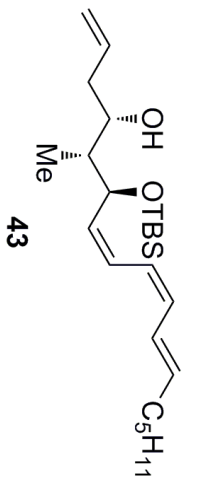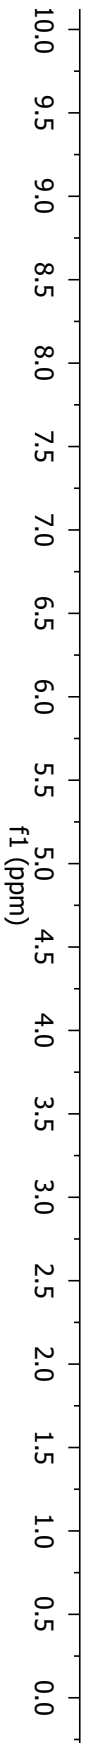

Solvent C6D6  
Spectrometer Frequency 125.76  
Nucleus 13C

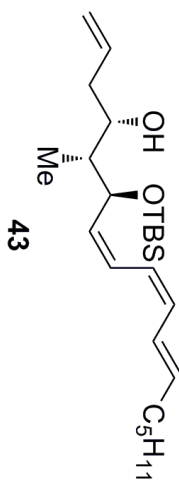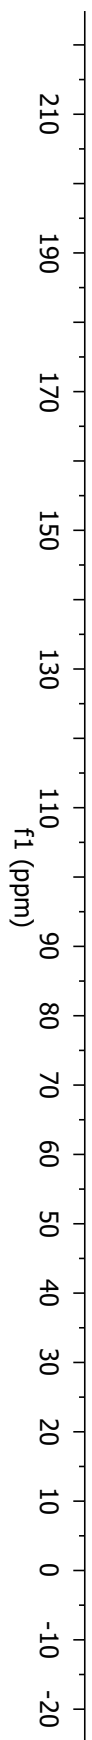

Solvent CD3OD  
Spectrometer Frequency 500.13  
Nucleus 1H

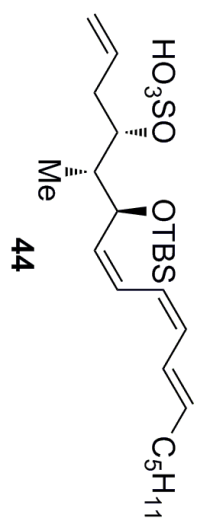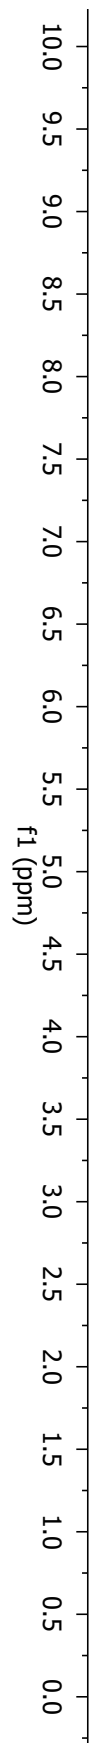

Solvent CD3OD  
Spectrometer Frequency 150.90  
Nucleus <sup>13</sup>C

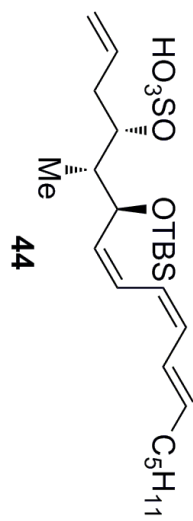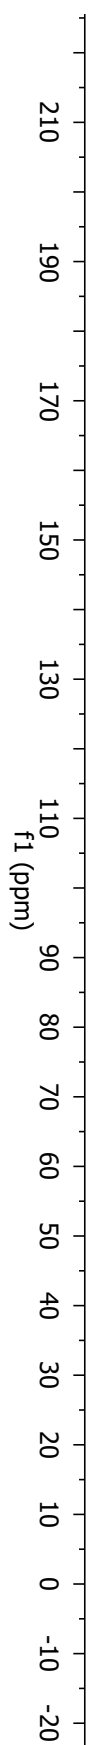



Solvent CD3OD  
Spectrometer Frequency 500.13  
Nucleus 1H

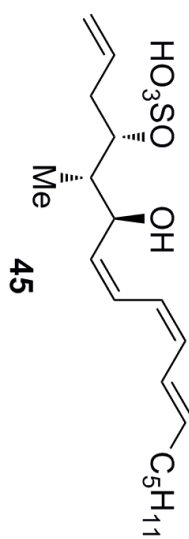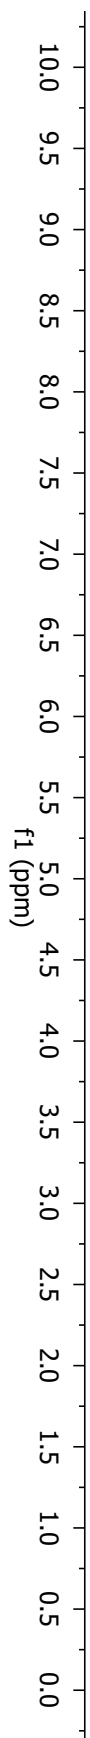

Solvent CD3OD  
Spectrometer Frequency 150.90  
Nucleus <sup>13</sup>C

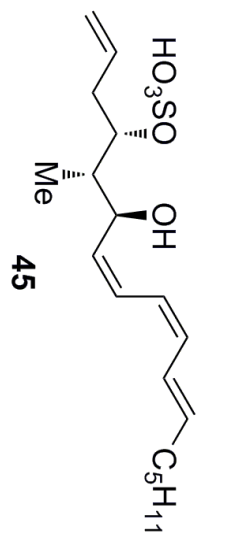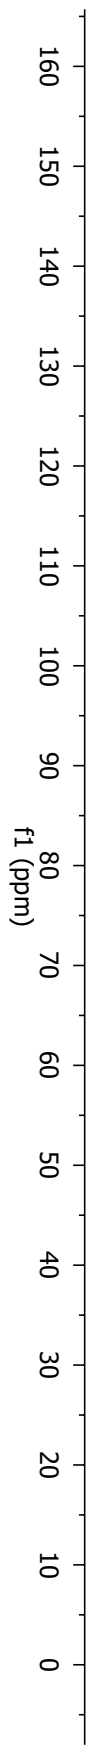

Solvent C6D6  
Spectrometer Frequency 500.13  
Nucleus 1H

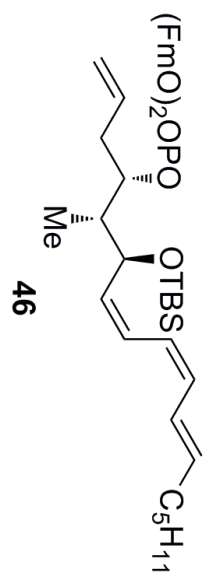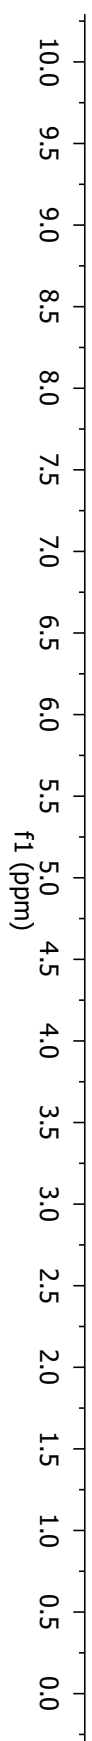

Solvent C6D6  
Spectrometer Frequency 150.90  
Nucleus <sup>13</sup>C

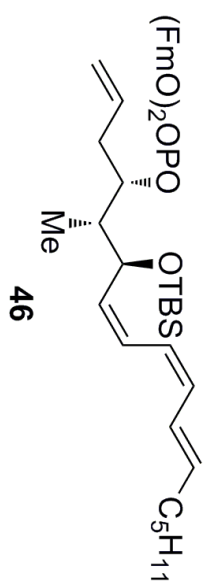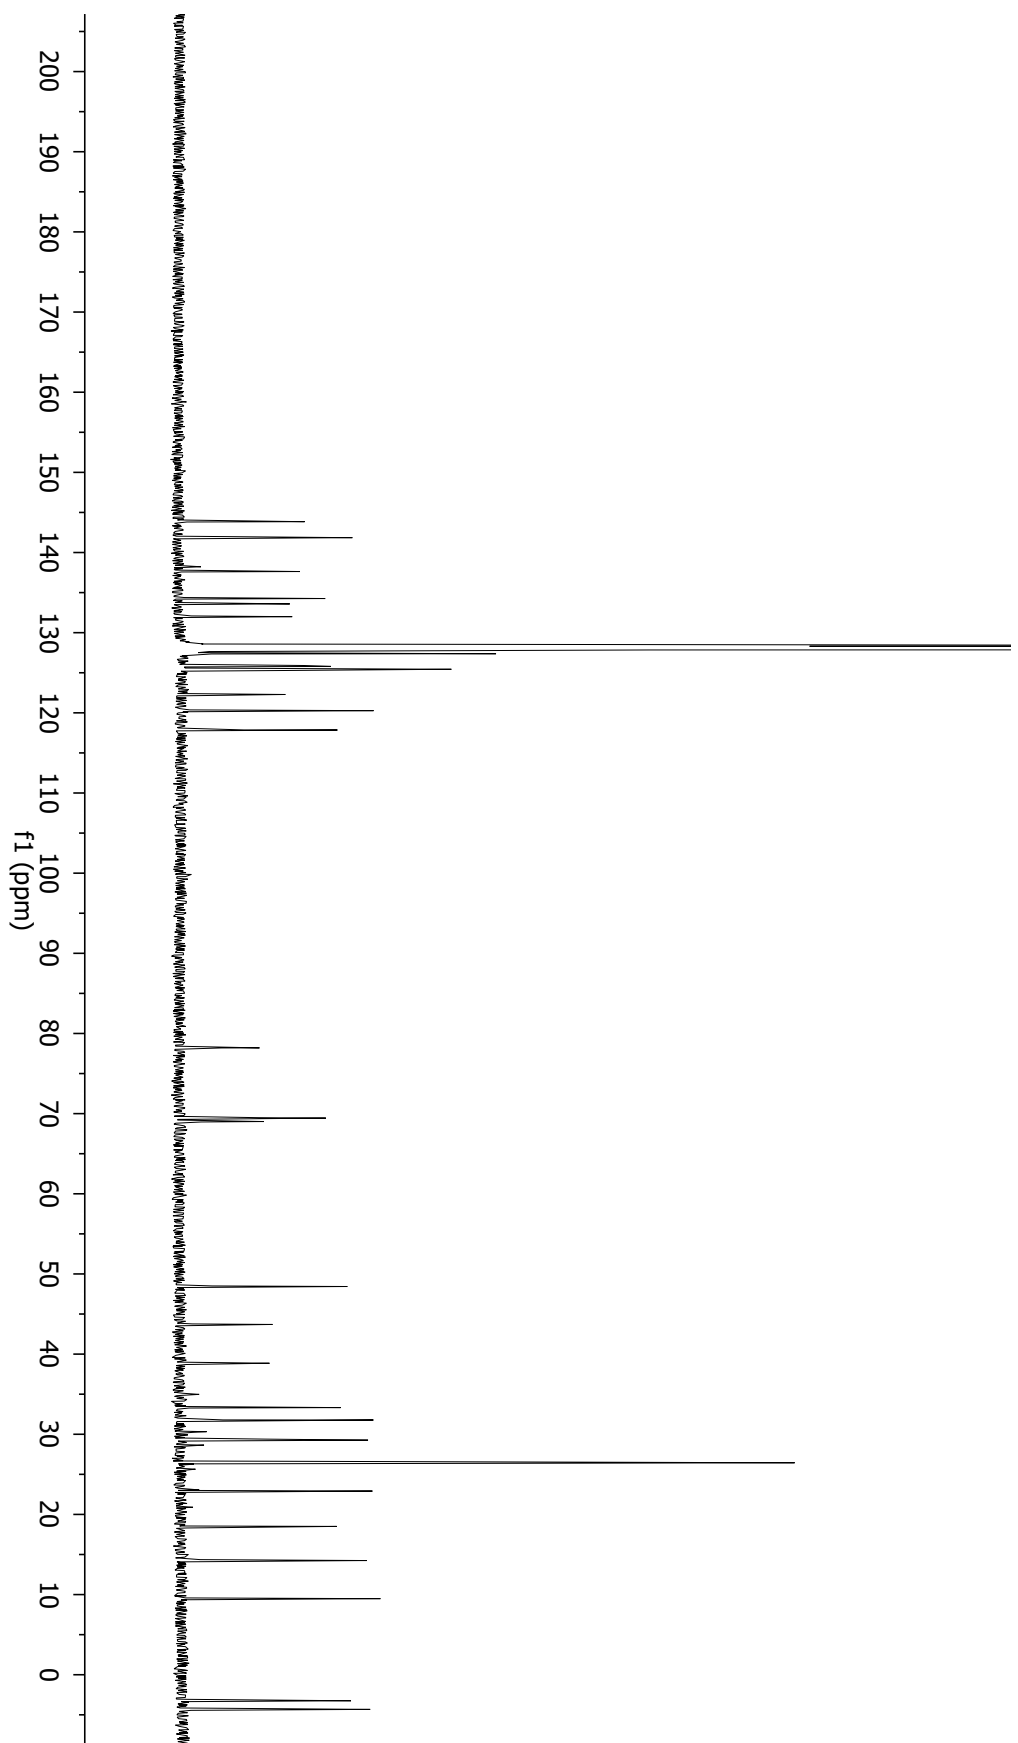

Solvent C6D6  
Spectrometer Frequency 161.97  
Nucleus 31P

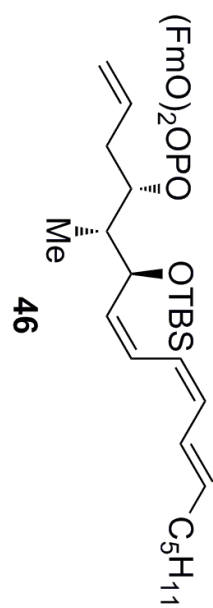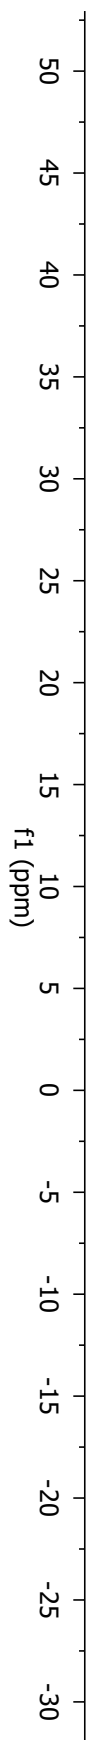

Solvent C6D6  
Spectrometer Frequency 500.13  
Nucleus 1H

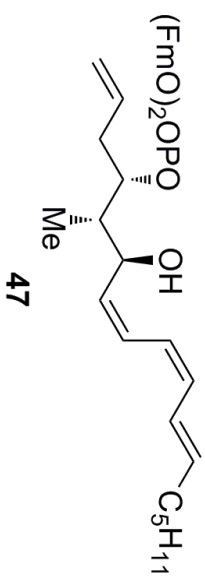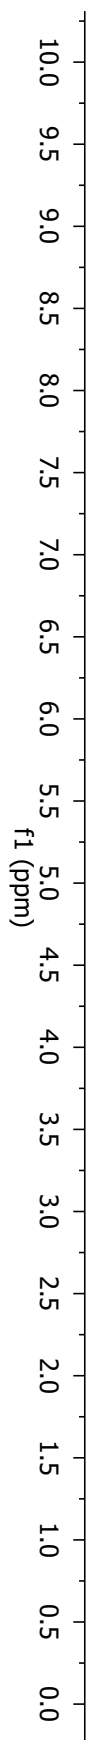

Solvent C6D6  
Spectrometer Frequency 150.90  
Nucleus <sup>13</sup>C

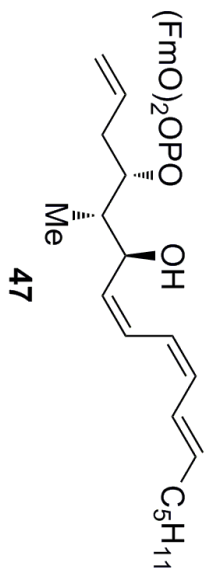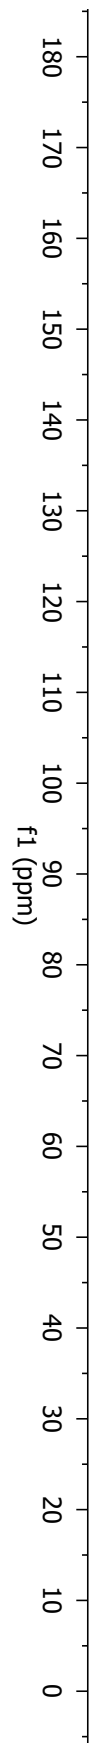

Solvent C6D6  
Spectrometer Frequency 161.97  
Nucleus 31P

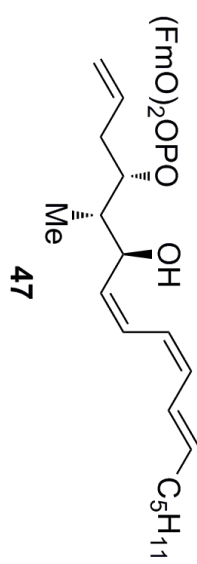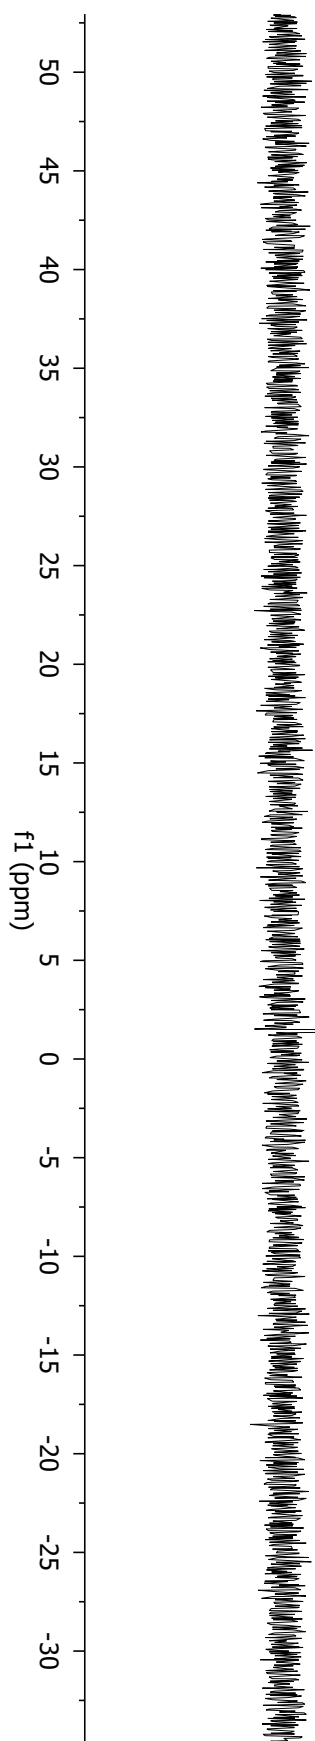



Solvent CD3OD  
Spectrometer Frequency 600.13  
Nucleus 1H

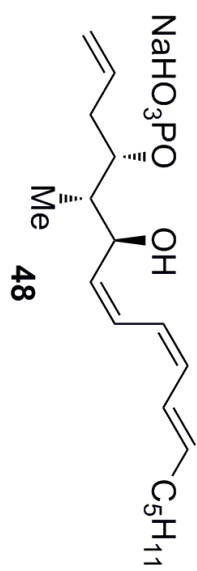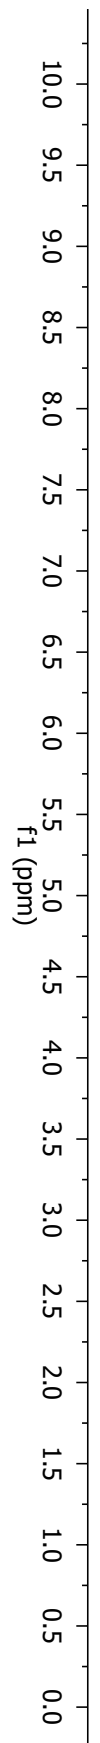

Solvent CD3OD  
Spectrometer Frequency 150.90  
Nucleus <sup>13</sup>C

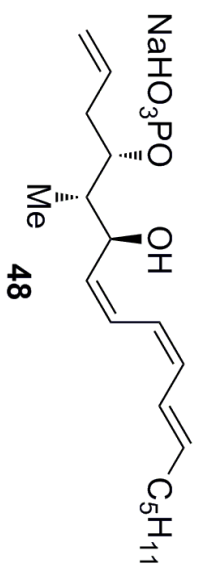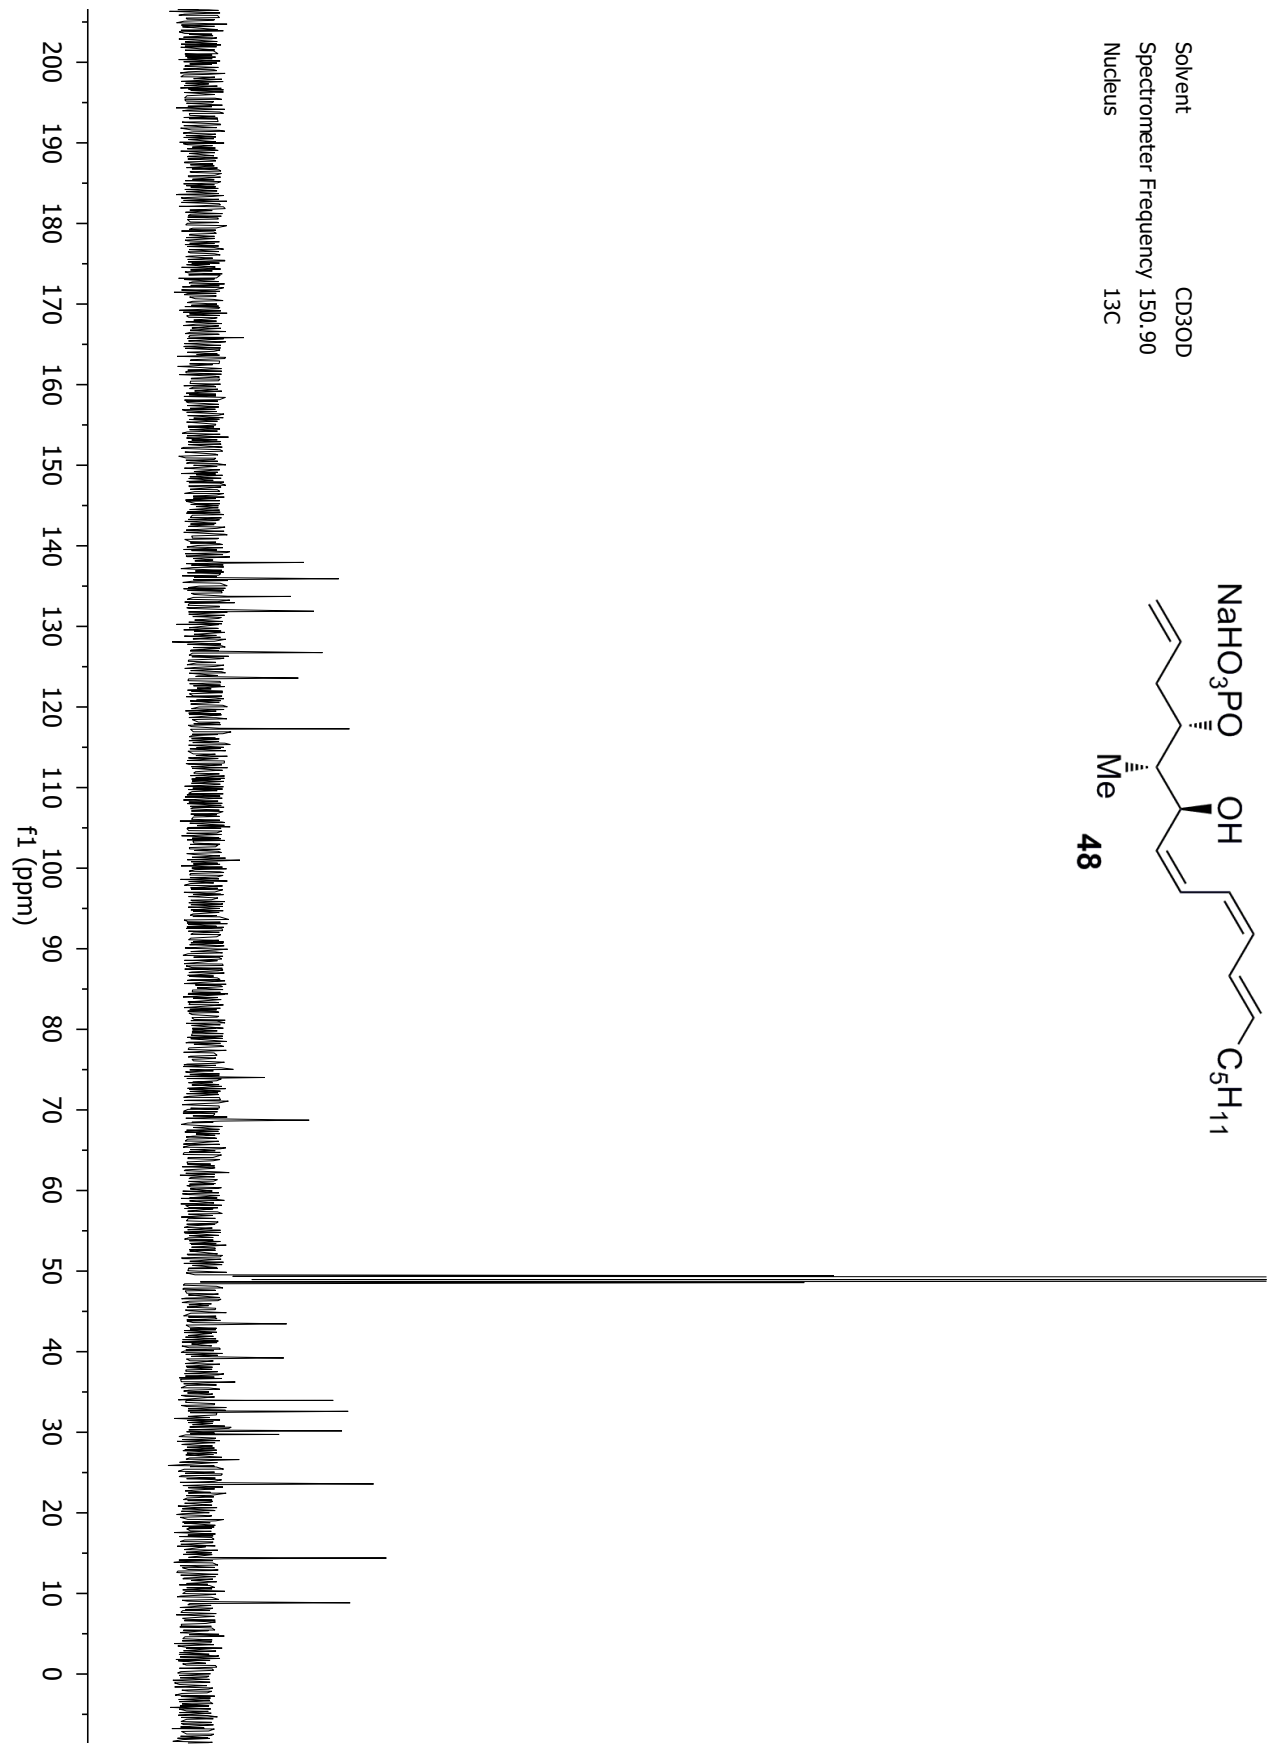

Solvent CD3OD  
Spectrometer Frequency 161.97  
Nucleus 31P

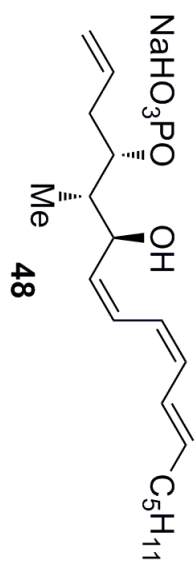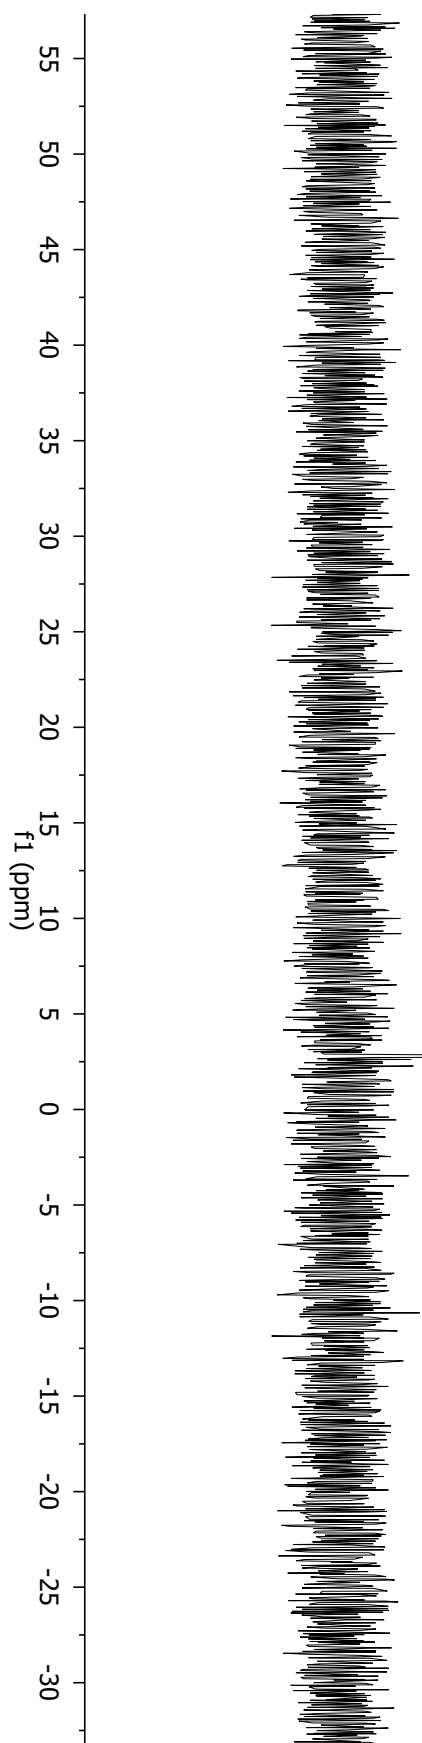

Solvent C6D6  
Spectrometer Frequency 400.12  
Nucleus 1H

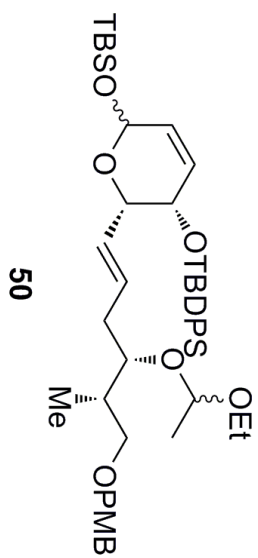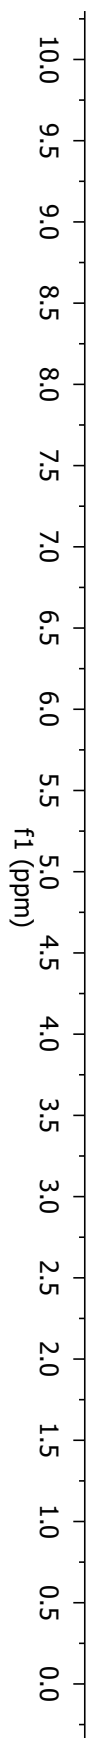

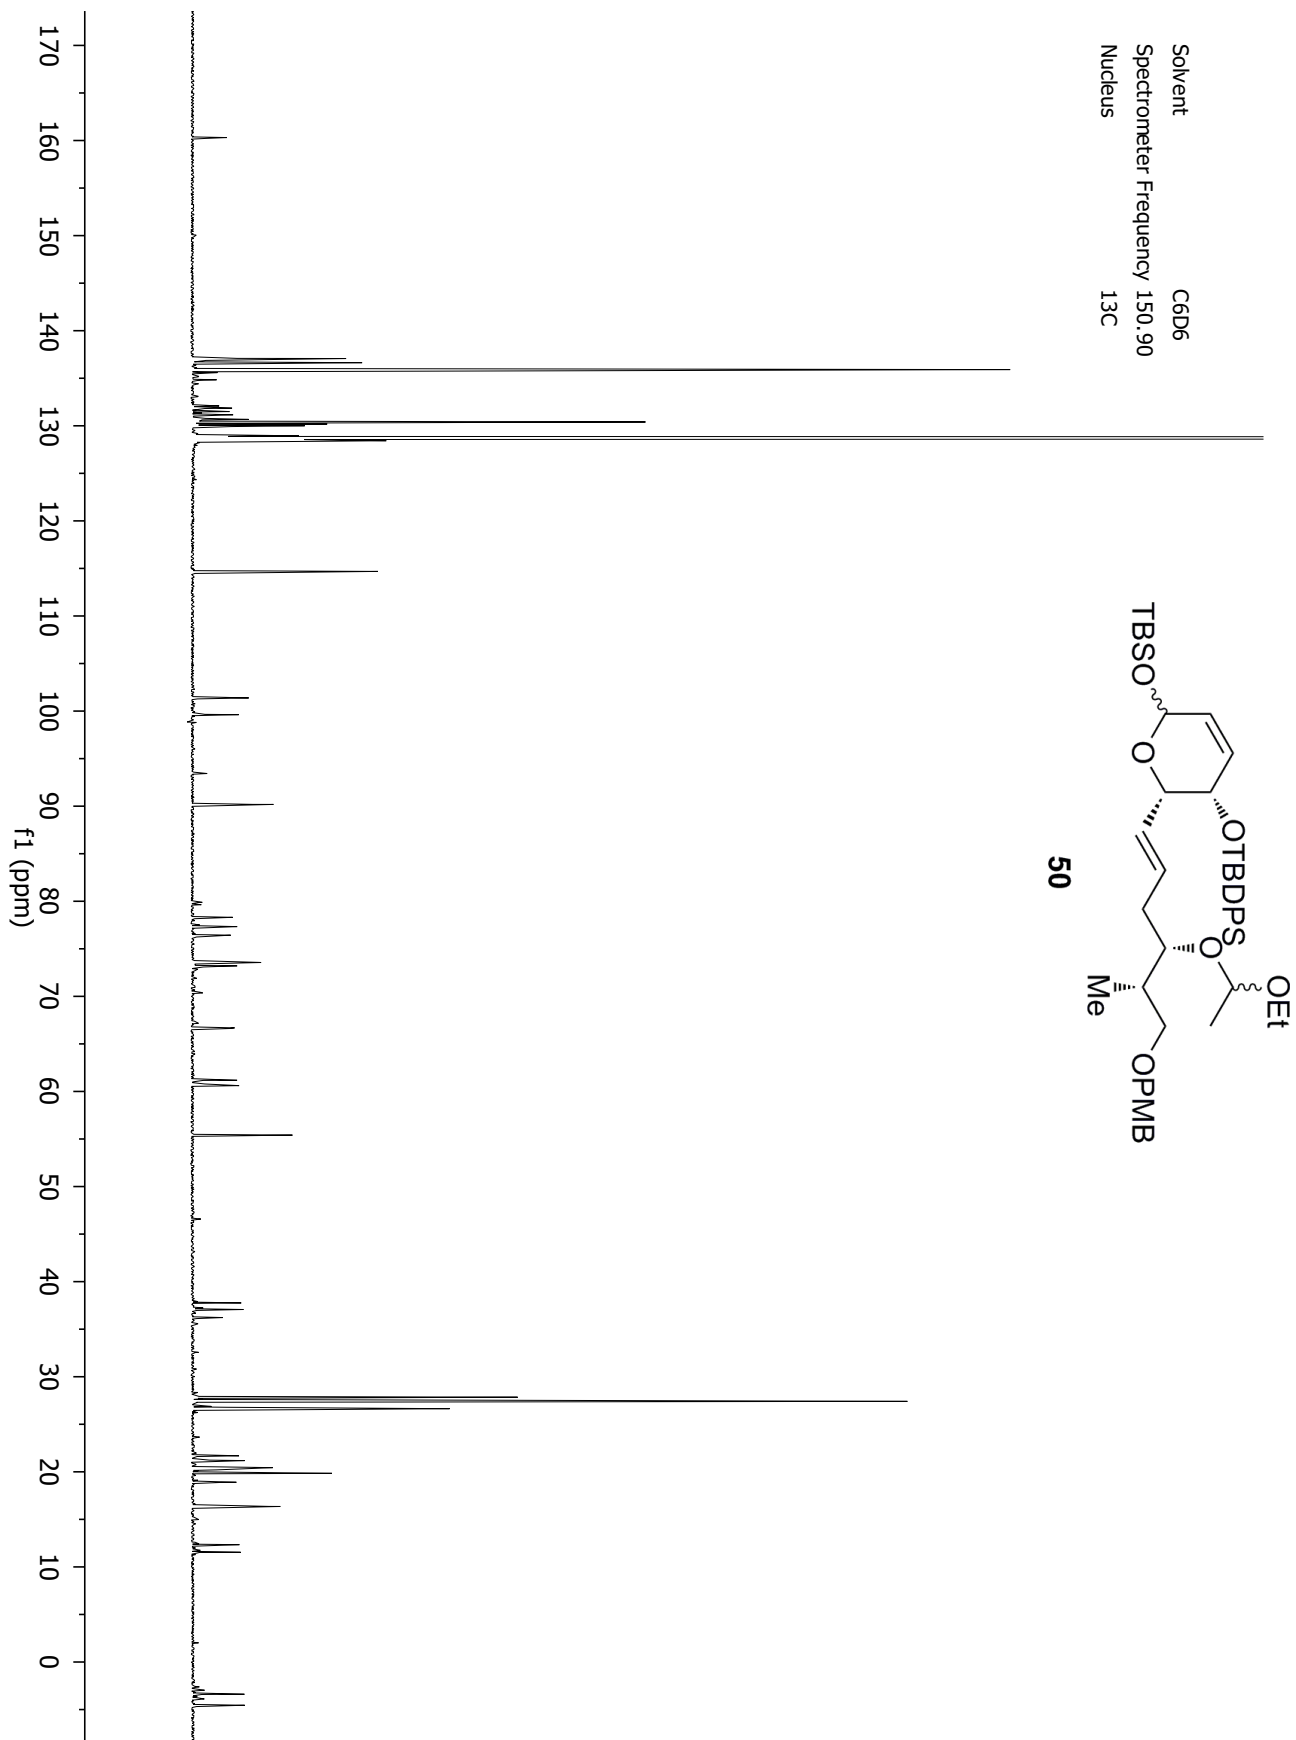

Solvent C6D6  
Spectrometer Frequency 600.13  
Nucleus 1H

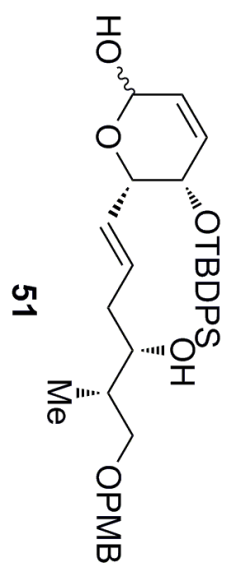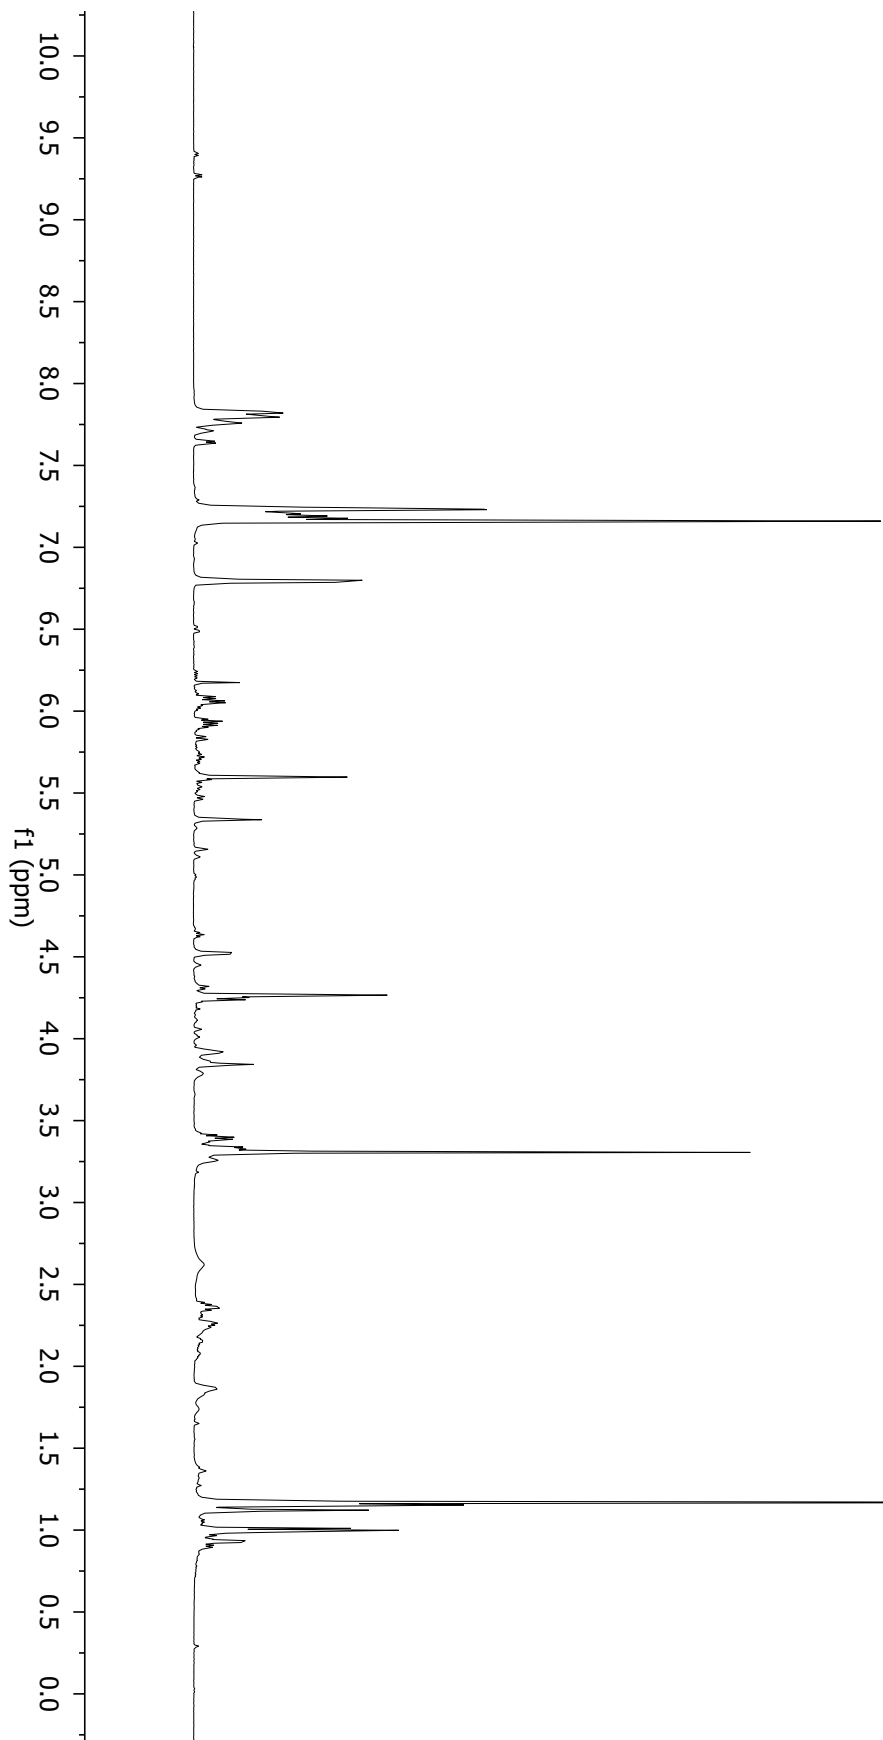

Solvent C6D6  
Spectrometer Frequency 150.92  
Nucleus 13C

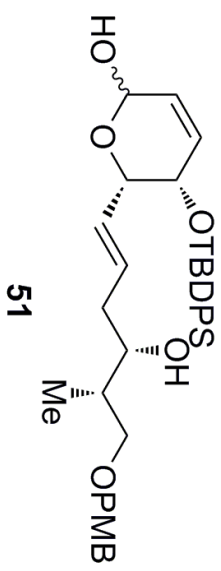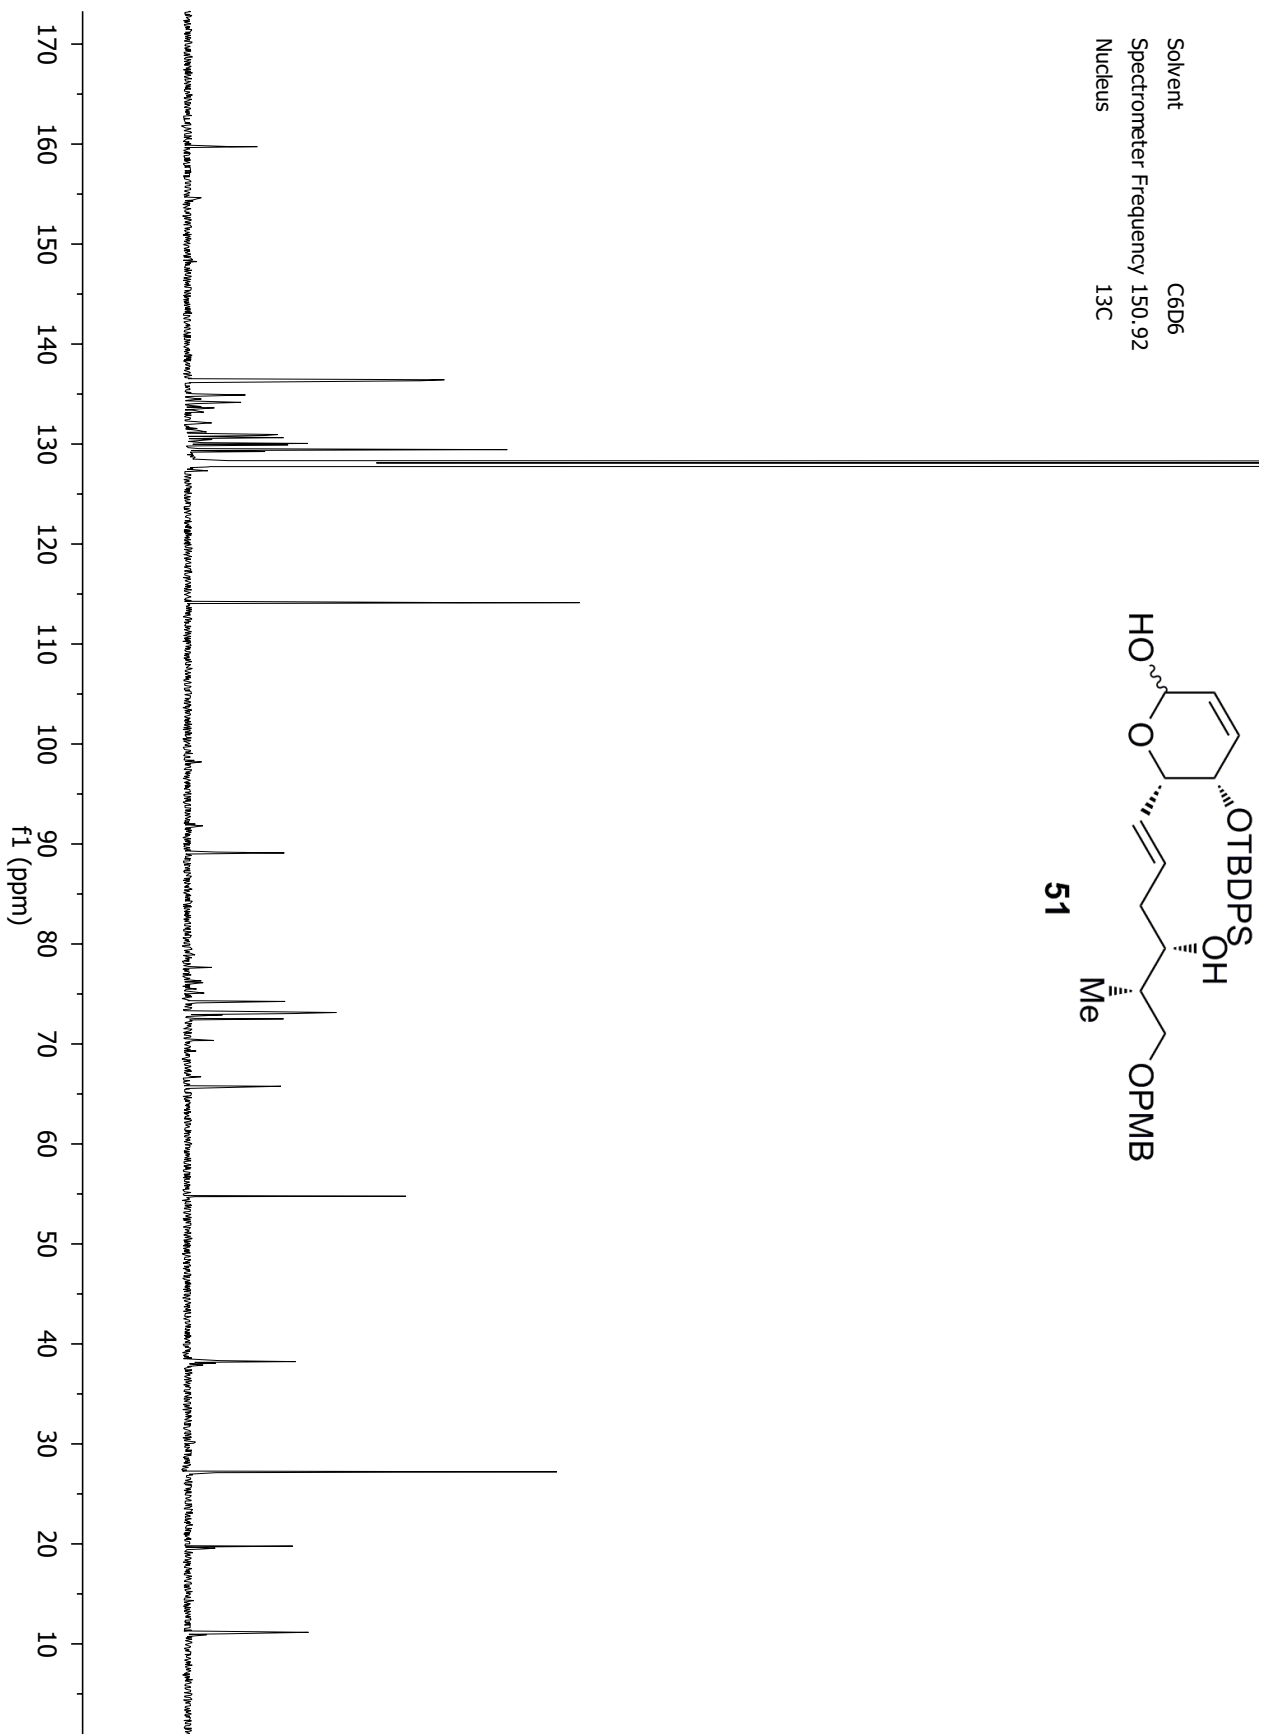

Solvent C6D6  
Spectrometer Frequency 400.12  
Nucleus 1H

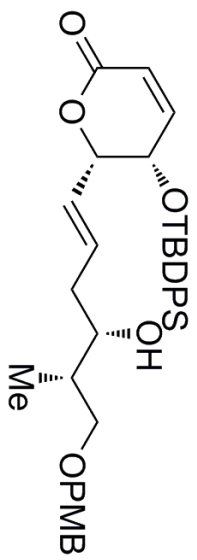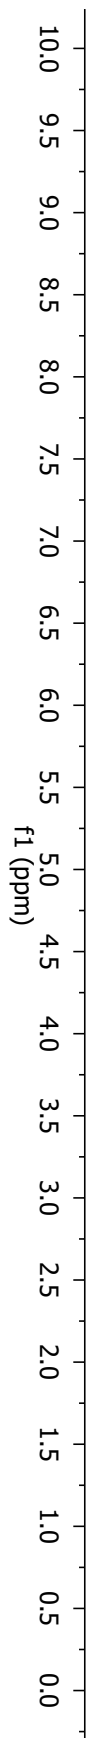



Solvent C6D6  
Spectrometer Frequency 150.90  
Nucleus 13C

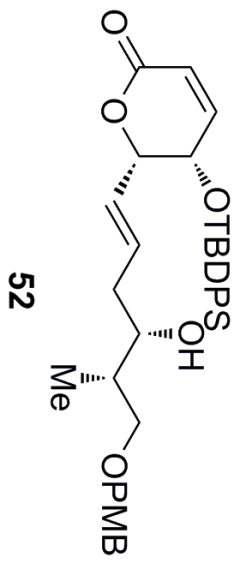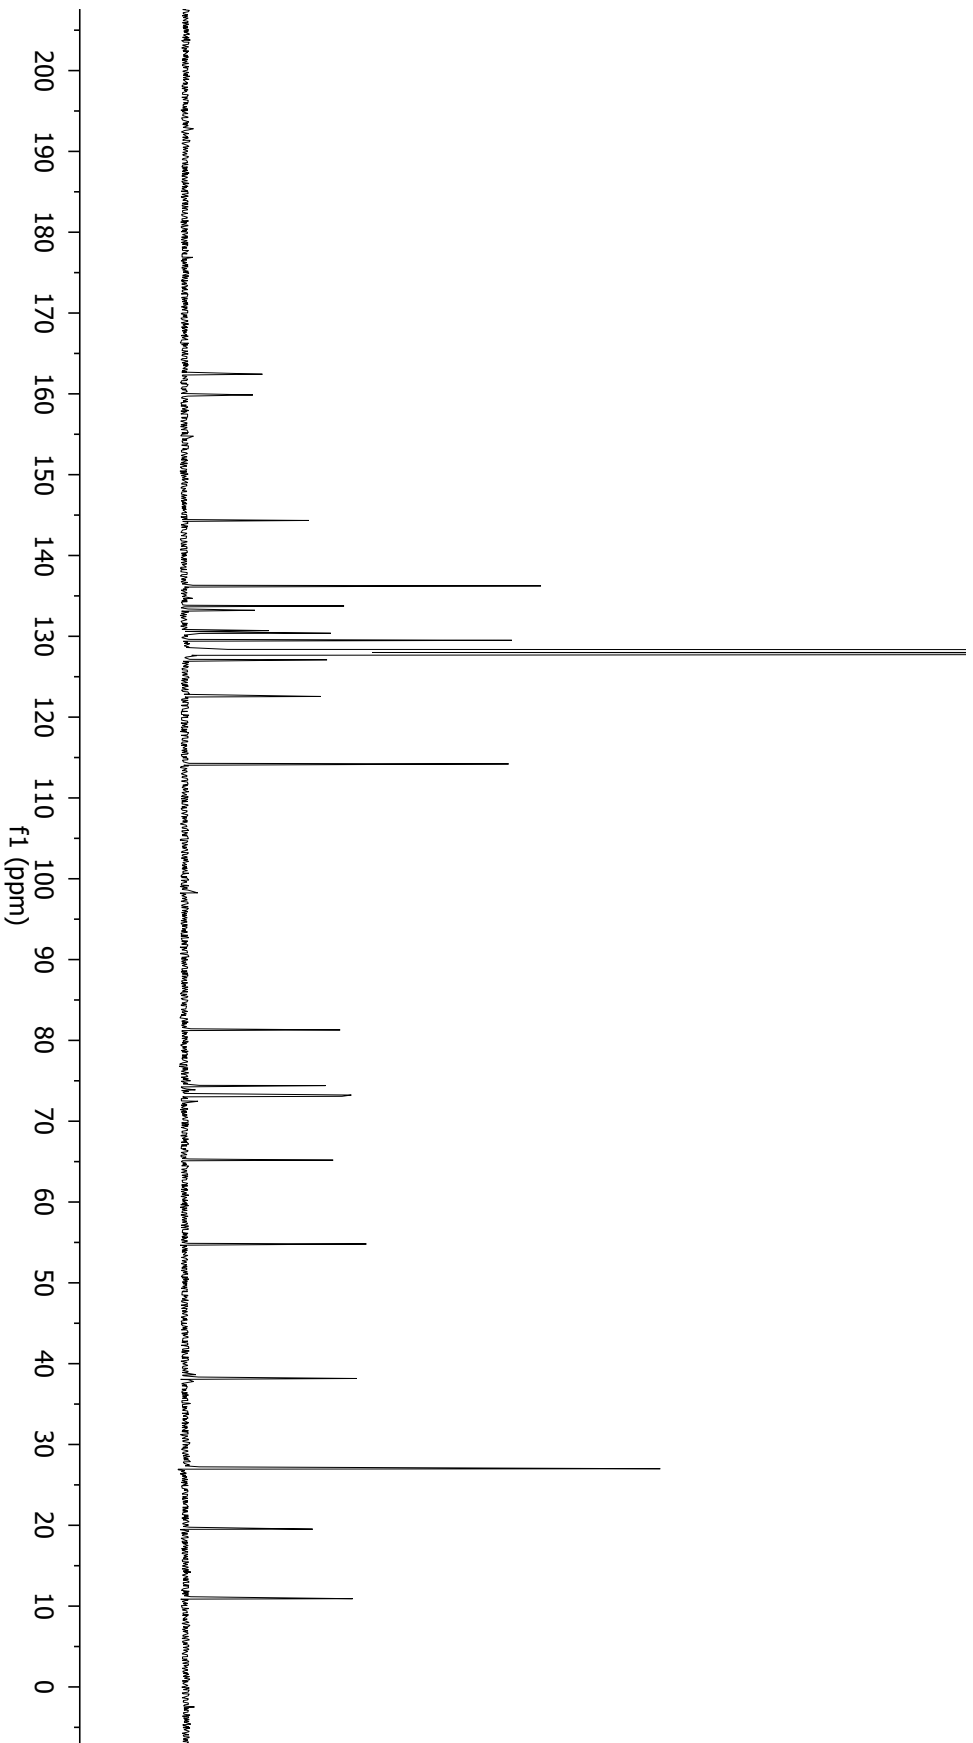

Solvent C6D6  
Spectrometer Frequency 600.13  
Nucleus 1H

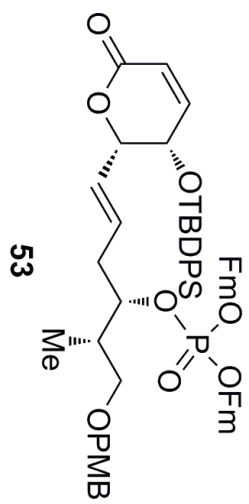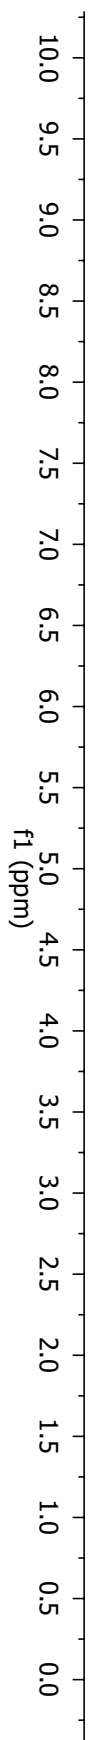

Solvent C6D6  
Spectrometer Frequency 150.92  
Nucleus 13C

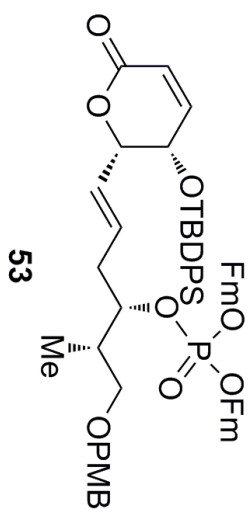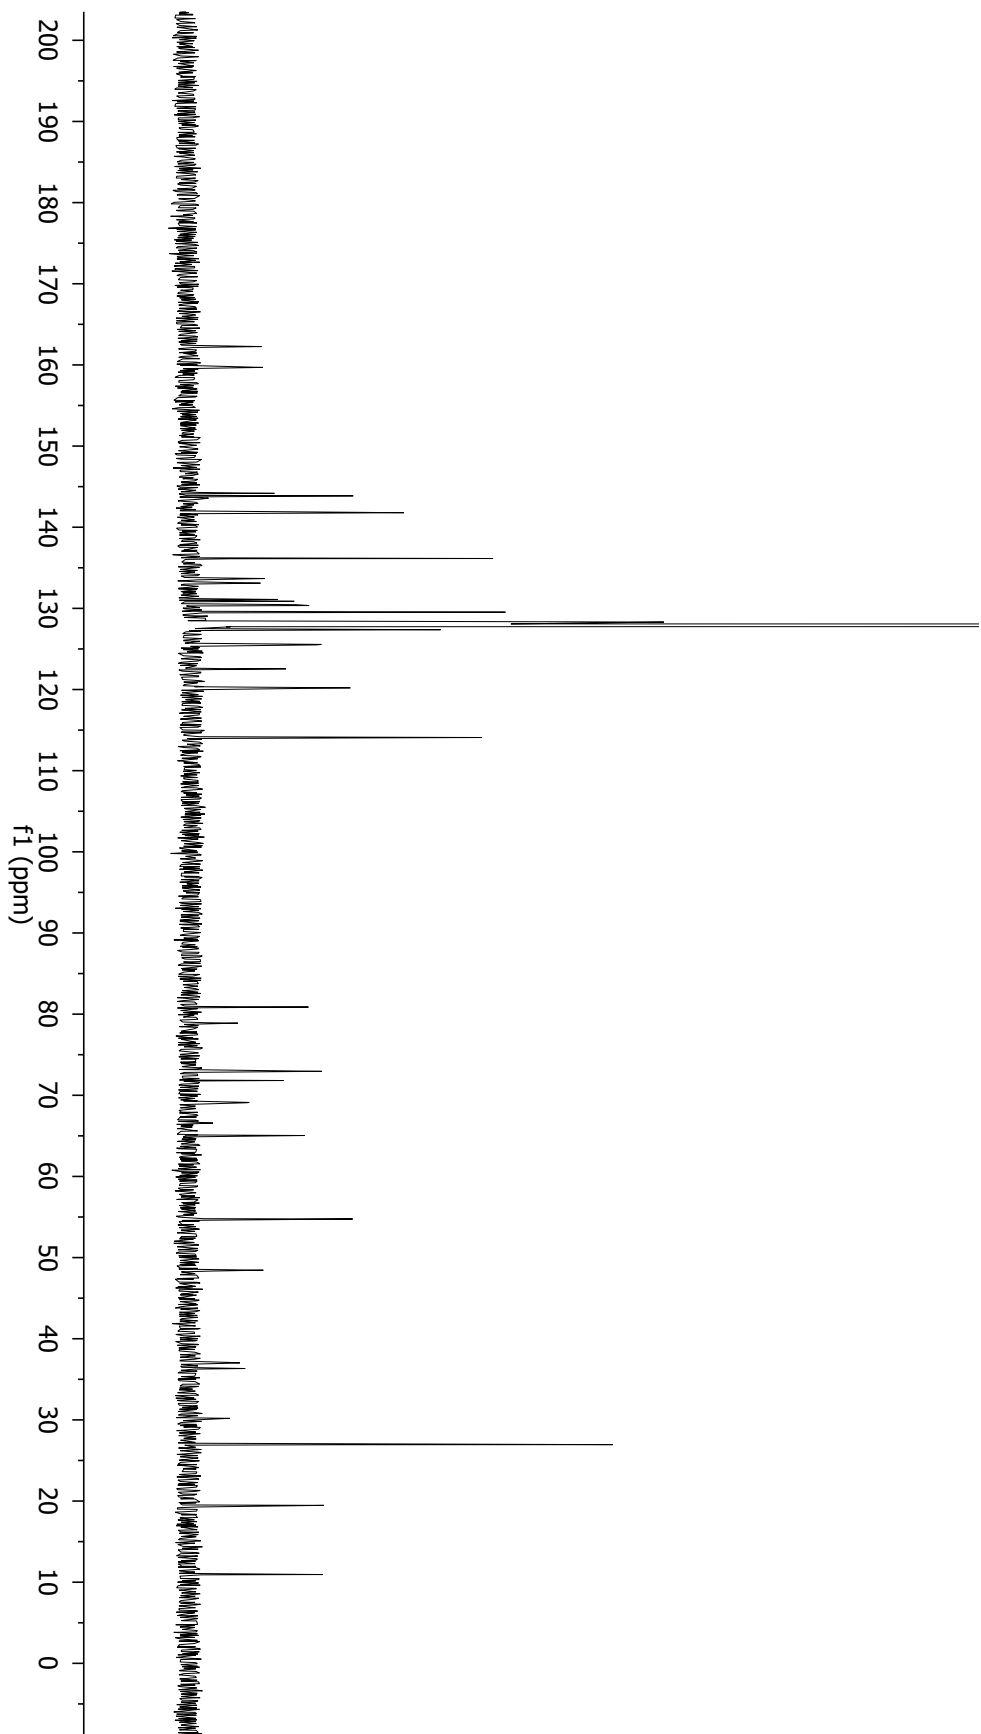

Solvent C6D6  
Spectrometer Frequency 161.97  
Nucleus 31P

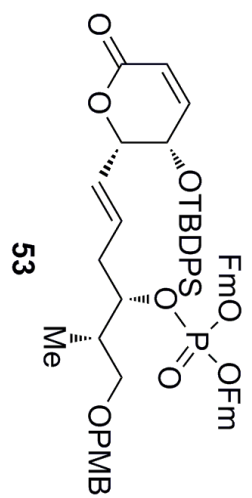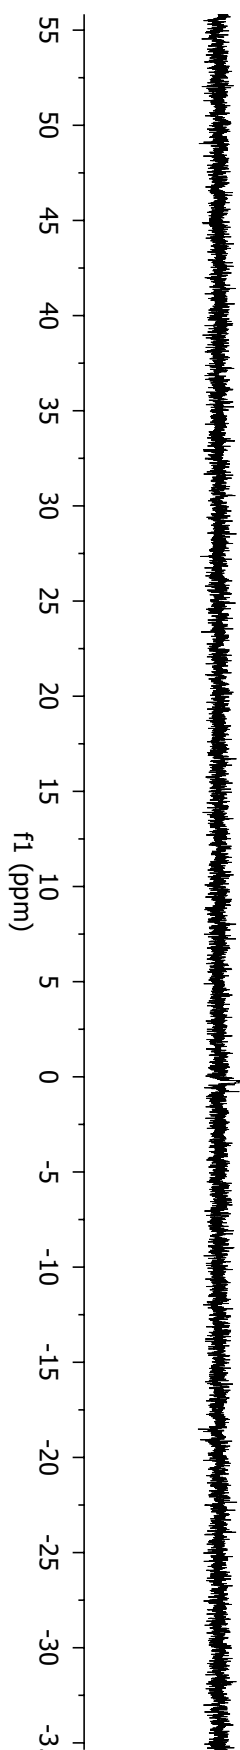

Solvent CD3OD  
Spectrometer Frequency 600.13  
Nucleus 1H

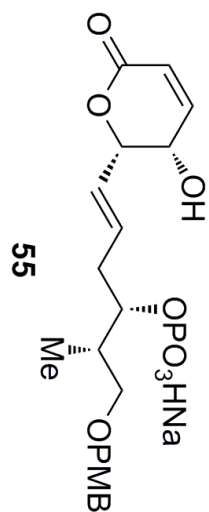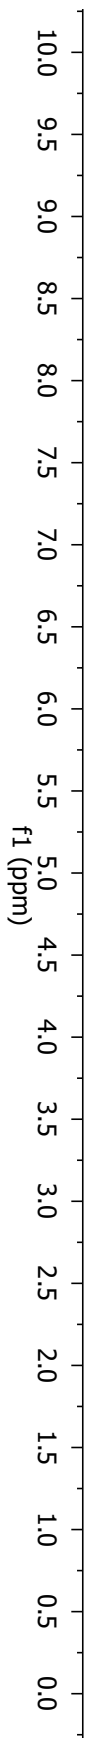

Solvent CD3OD  
Spectrometer Frequency 150.90  
Nucleus <sup>13</sup>C

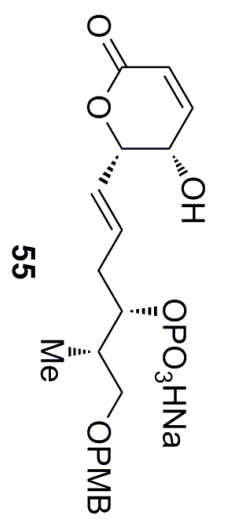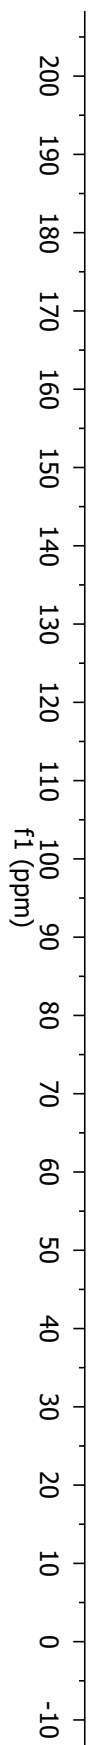

Solvent CD3OD  
Spectrometer Frequency 161.97  
Nucleus 31P

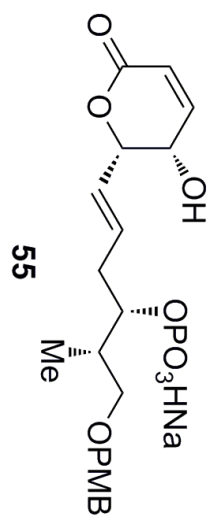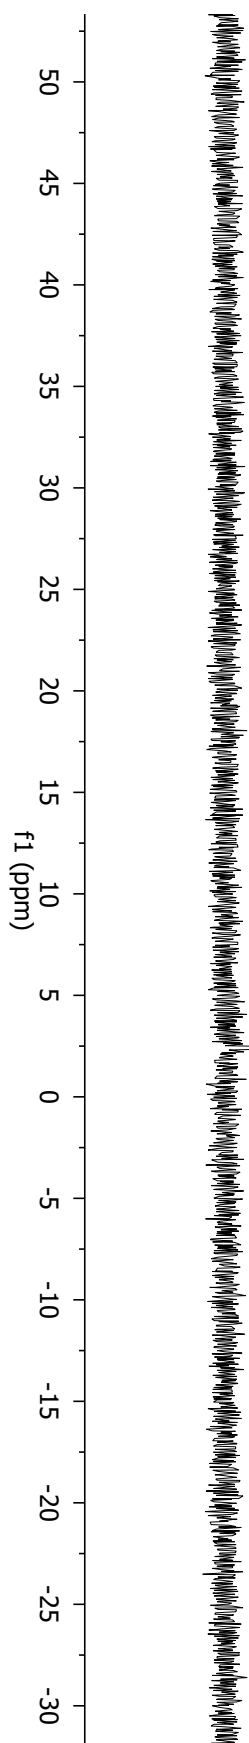

Solvent C6D6  
Spectrometer Frequency 600.13  
Nucleus 1H

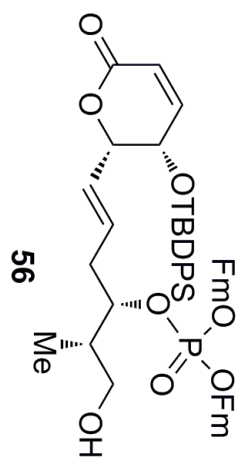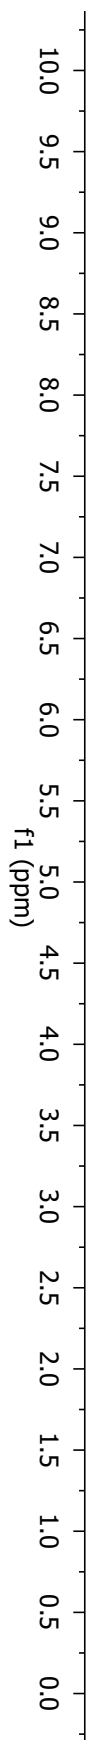



Solvent C6D6  
Spectrometer Frequency 150.90  
Nucleus <sup>13</sup>C

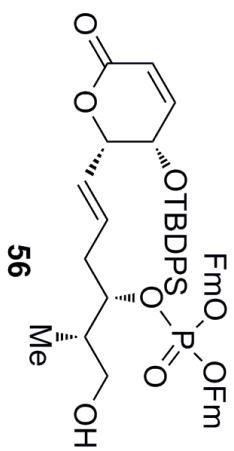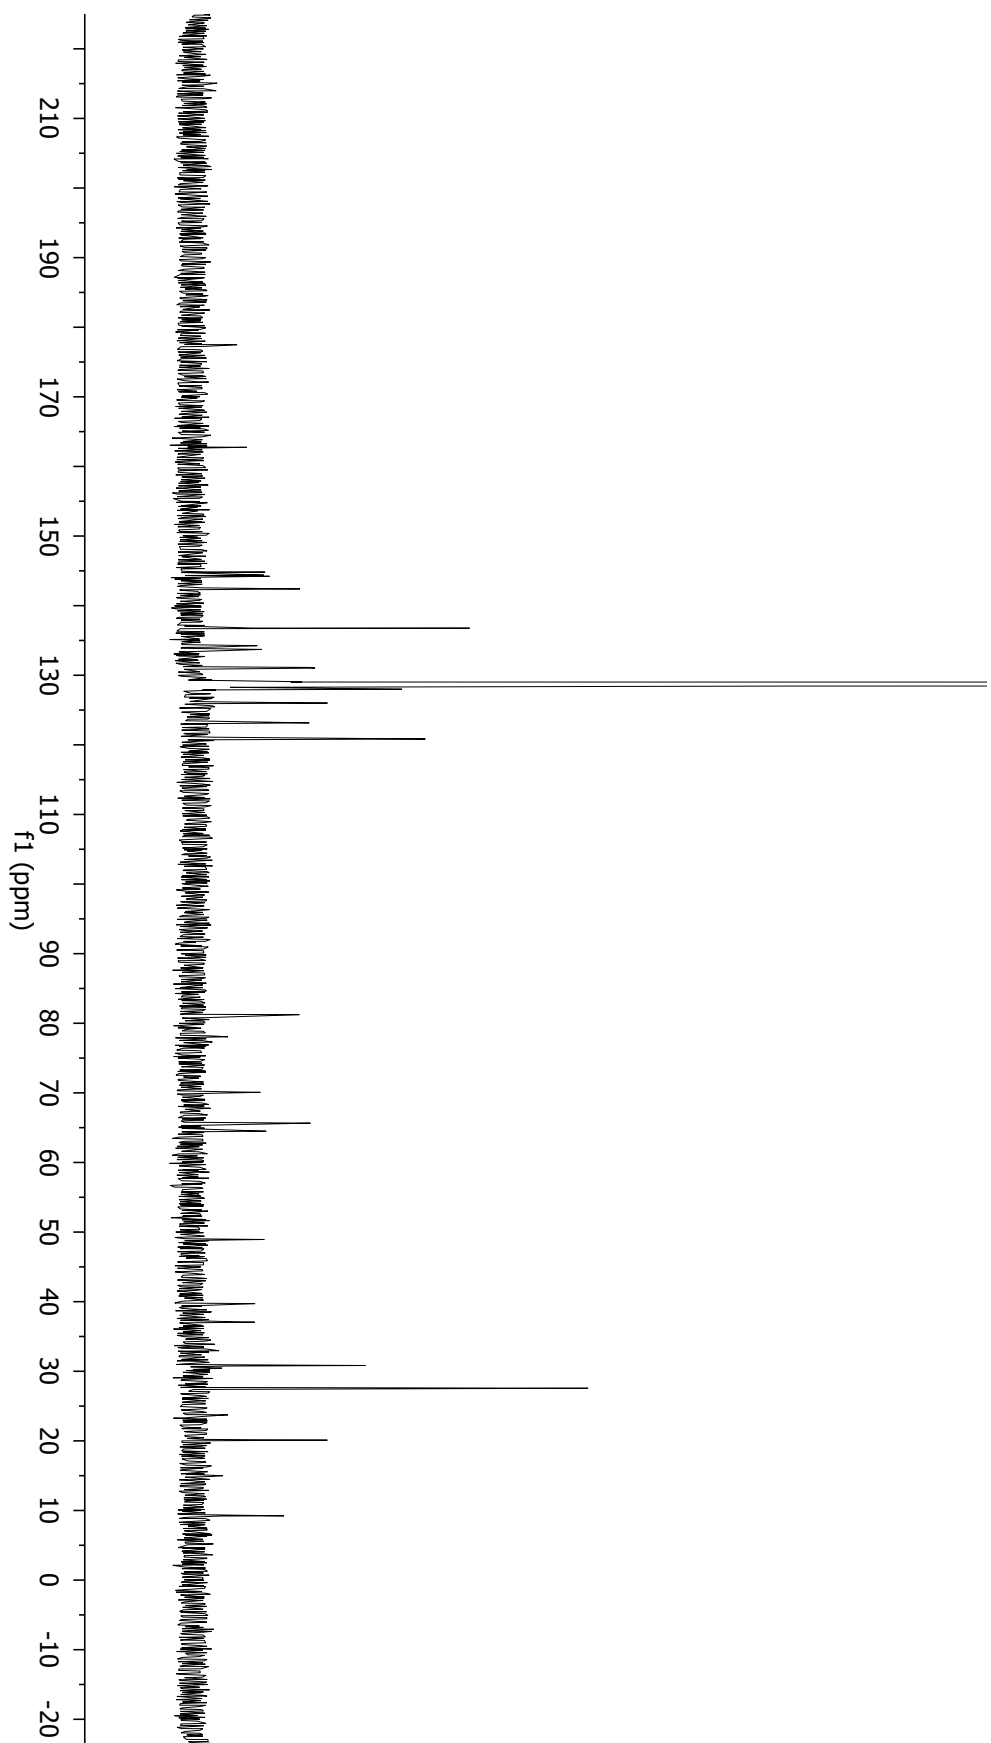

Solvent C6D6  
Spectrometer Frequency 161.97  
Nucleus 31P

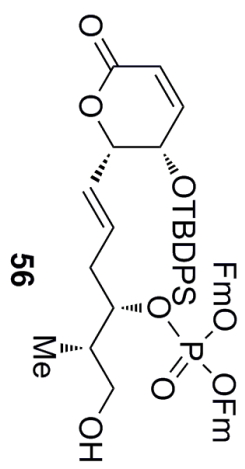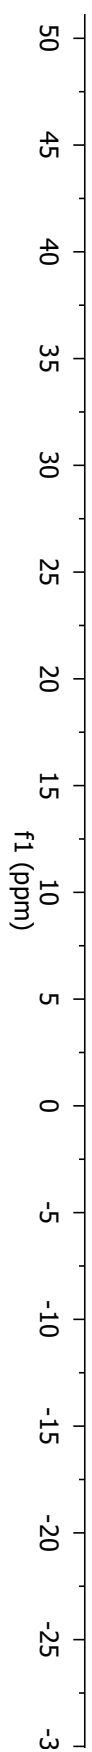

Solvent CD3OD  
Spectrometer Frequency 600.13  
Nucleus 1H

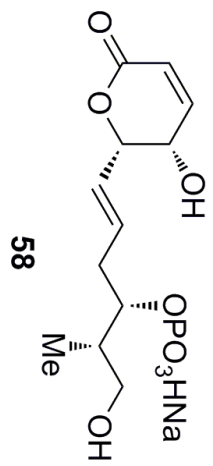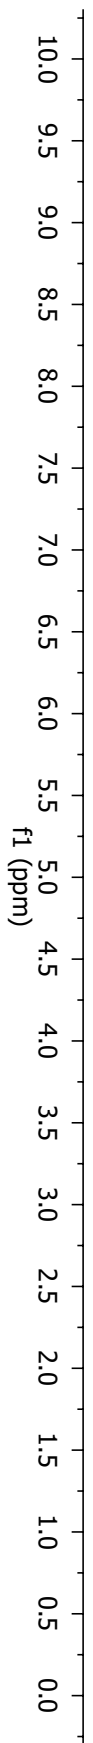

Solvent CD3OD  
Spectrometer Frequency 150.90  
Nucleus <sup>13</sup>C

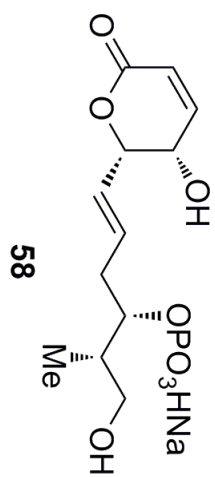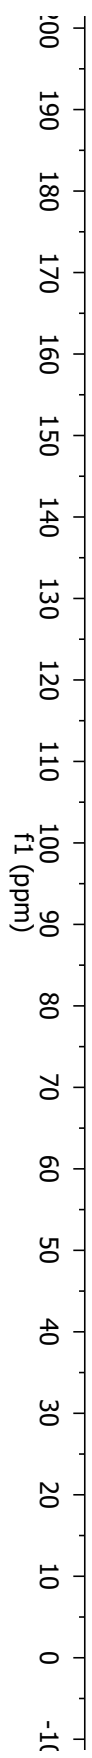

Solvent CD3OD  
Spectrometer Frequency 161.97  
Nucleus 31P

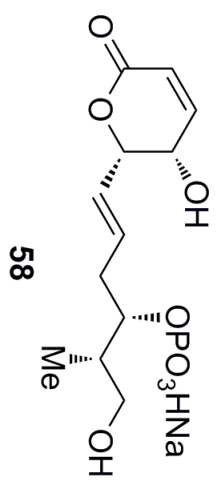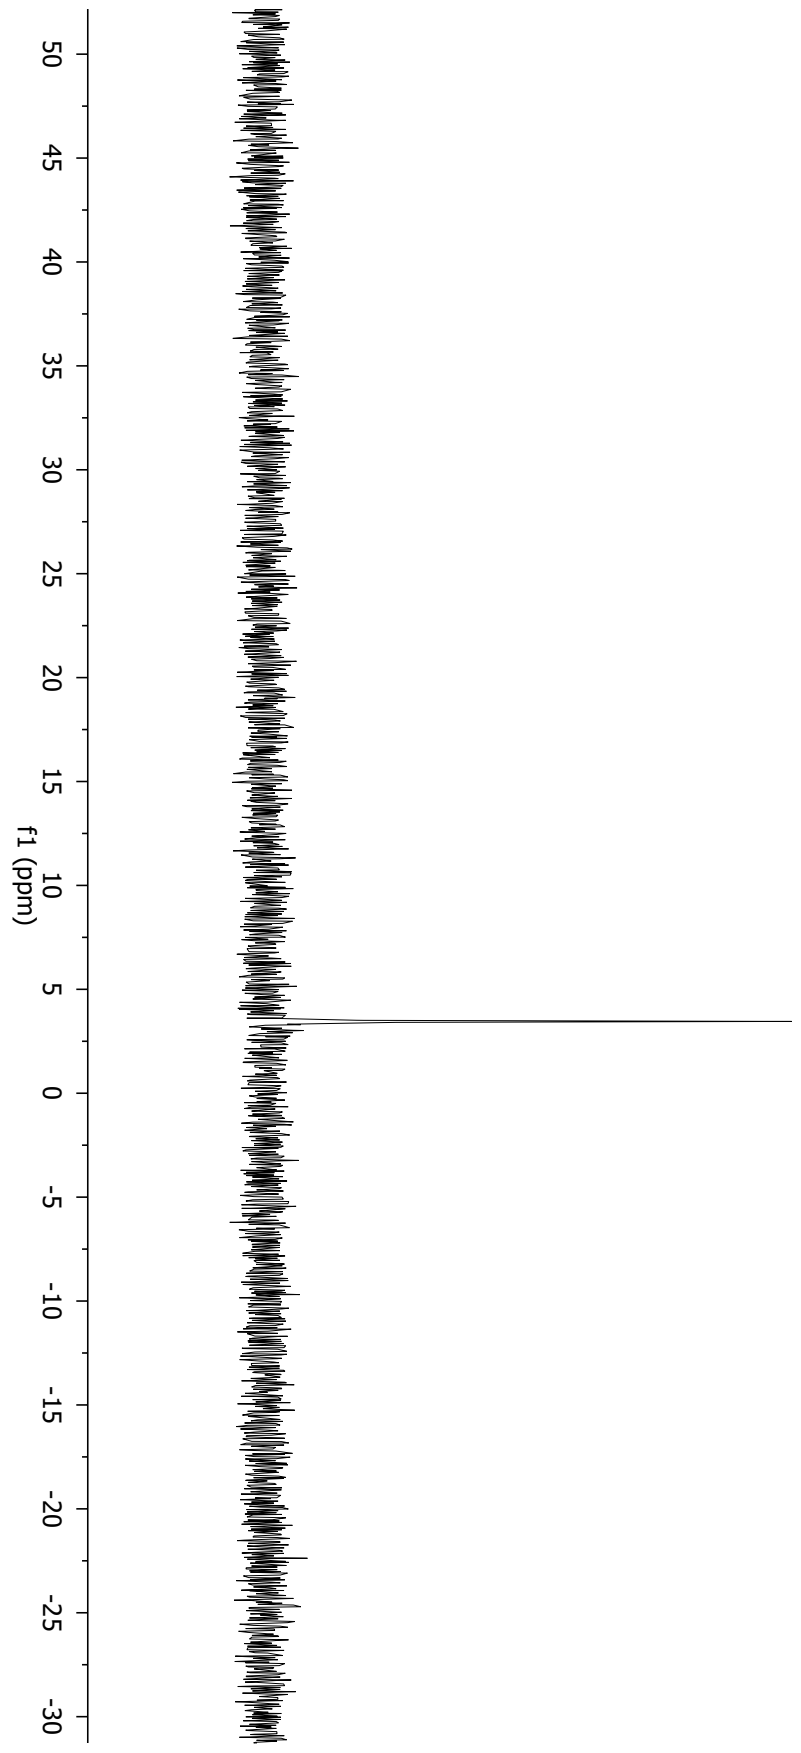

Solvent C6D6  
Spectrometer Frequency 400.12  
Nucleus 1H

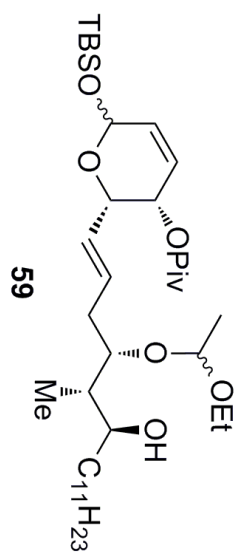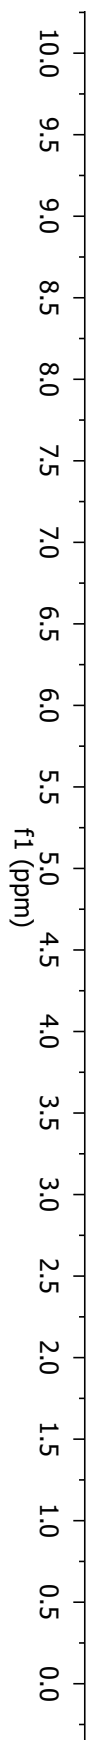

Solvent C6D6  
Spectrometer Frequency 150.90  
Nucleus <sup>13</sup>C

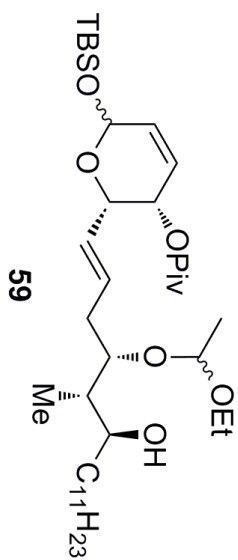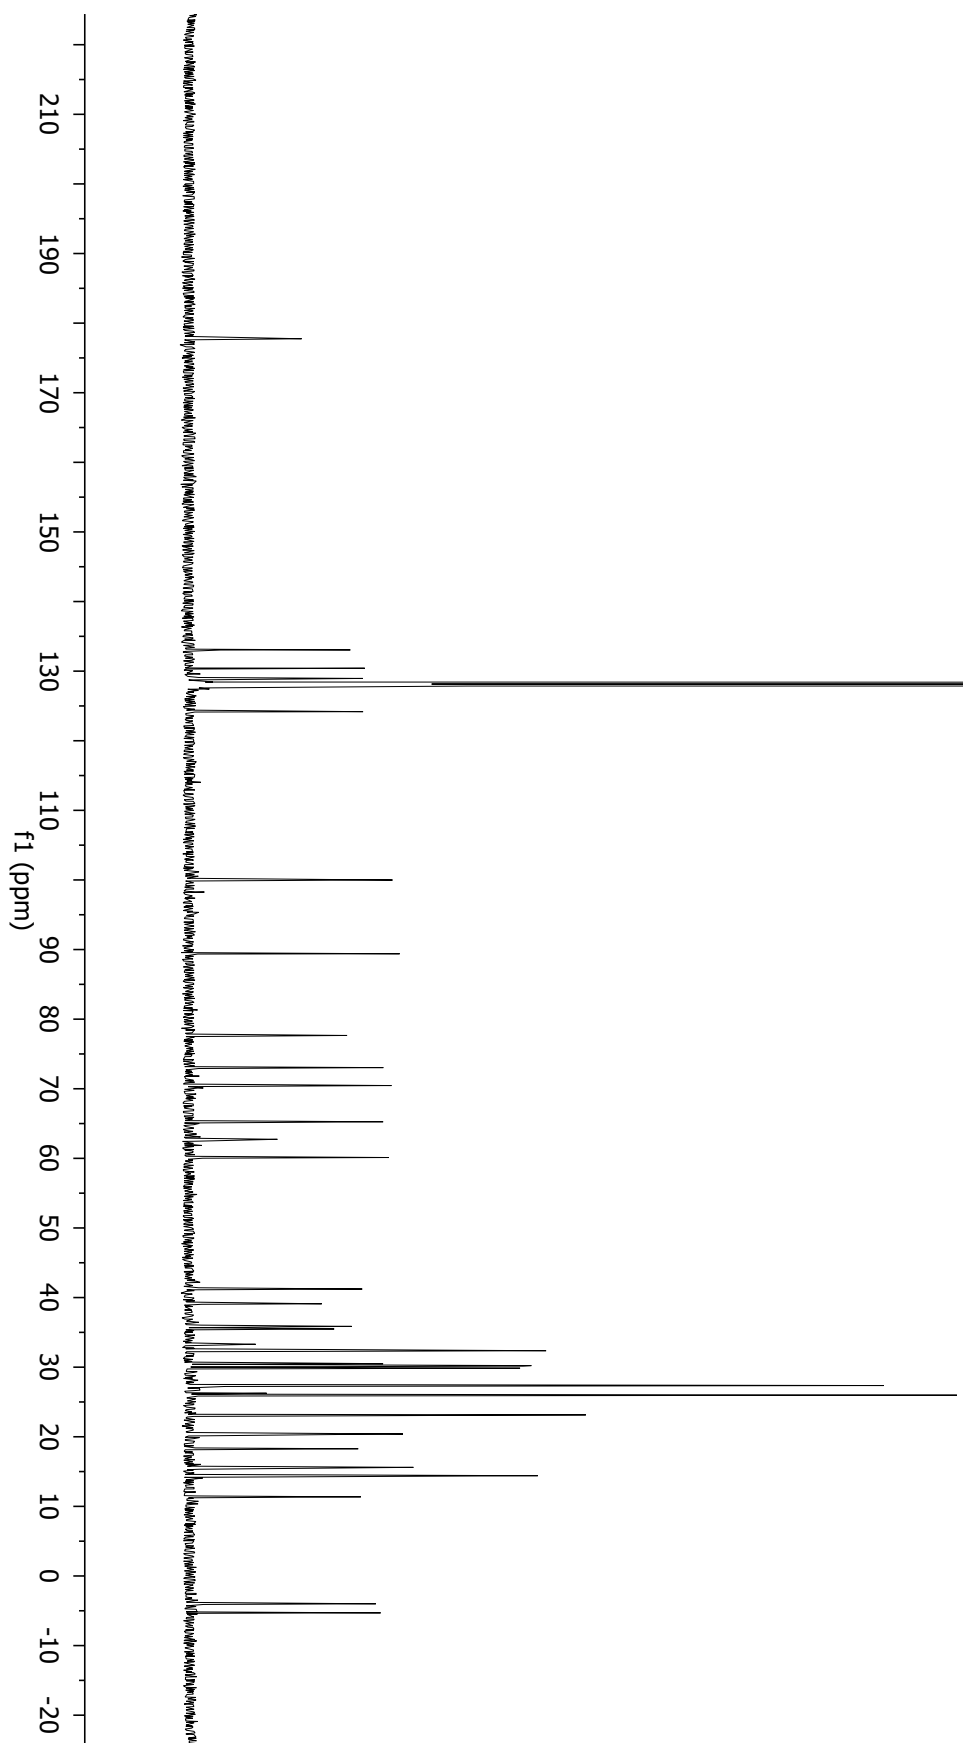

Solvent C6D6  
Spectrometer Frequency 600.13  
Nucleus 1H

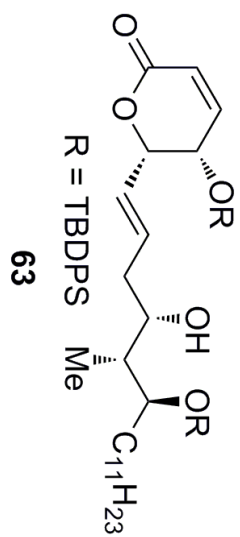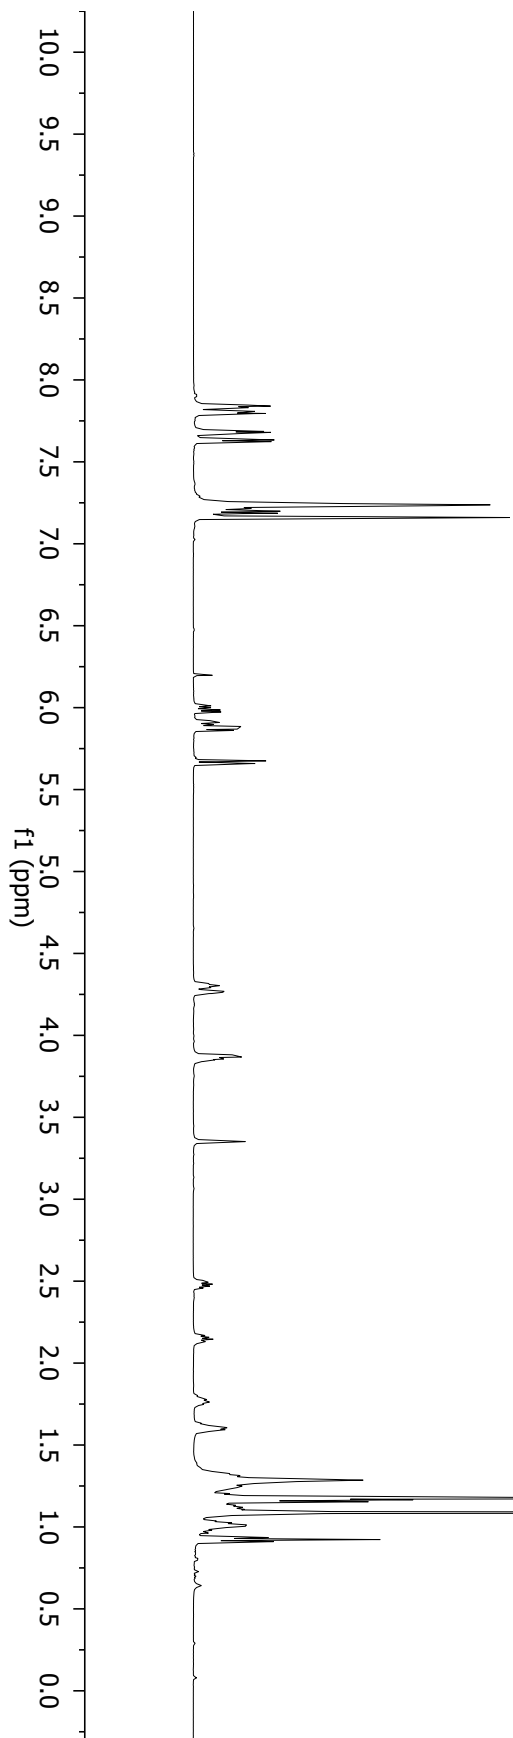



Solvent C6D6  
Spectrometer Frequency 150.90  
Nucleus <sup>13</sup>C

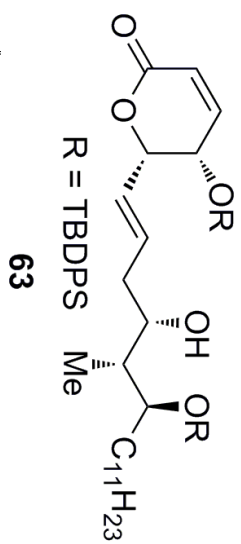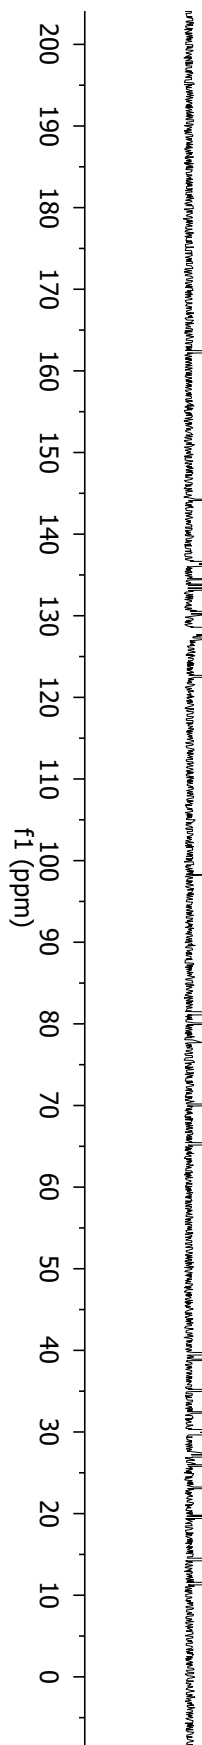

Solvent C6D6  
Spectrometer Frequency 600.13  
Nucleus 1H

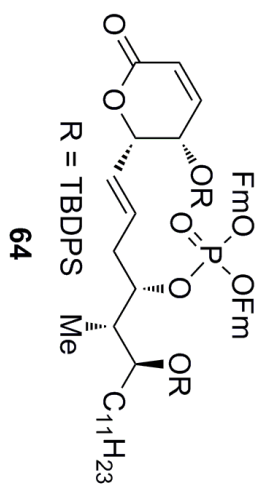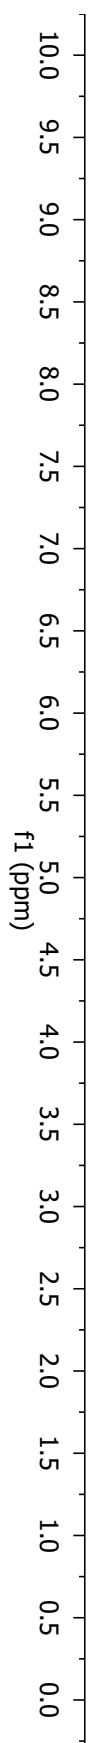

Solvent C6D6  
 Spectrometer Frequency 150.90  
 Nucleus <sup>13</sup>C

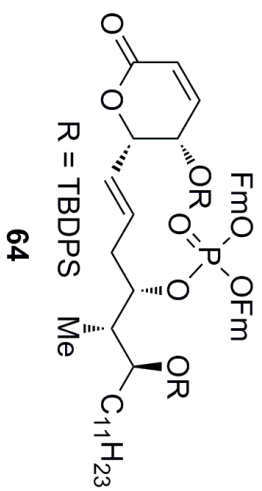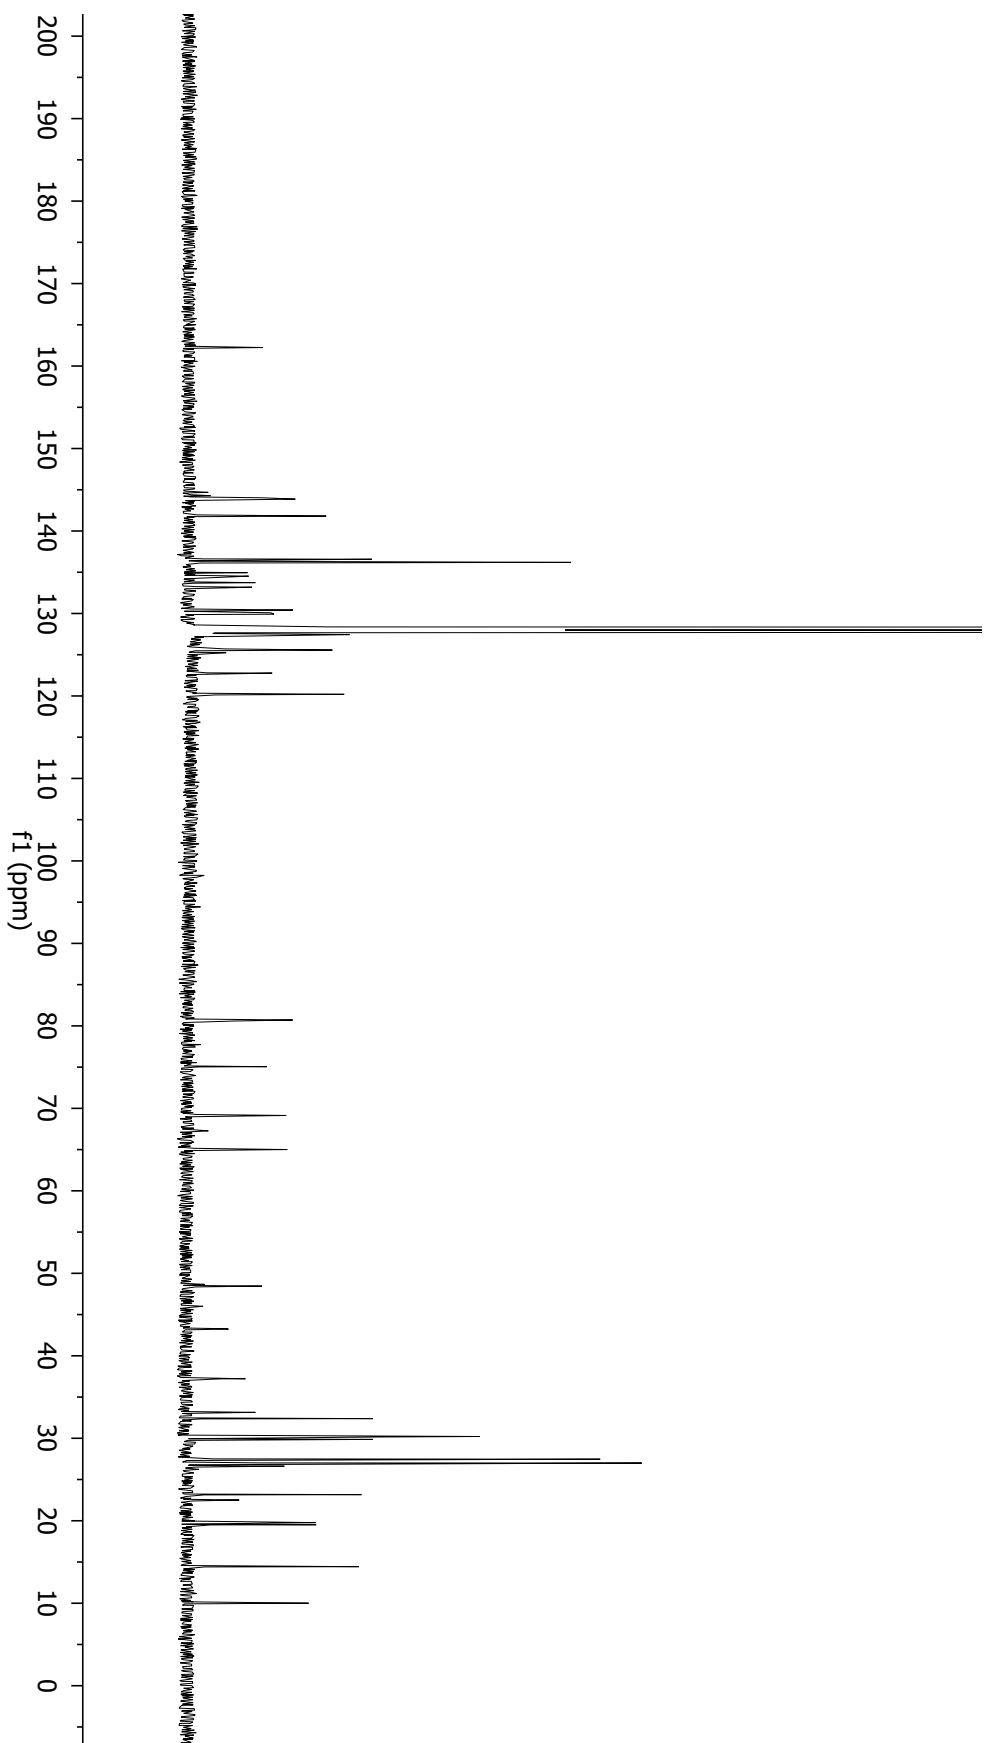

Solvent C6D6  
Spectrometer Frequency 161.97  
Nucleus 31P

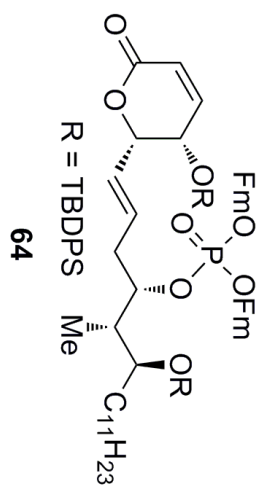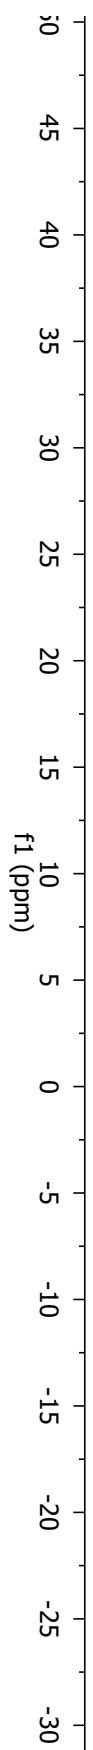

Solvent CD3OD  
Spectrometer Frequency 600.13  
Nucleus 1H

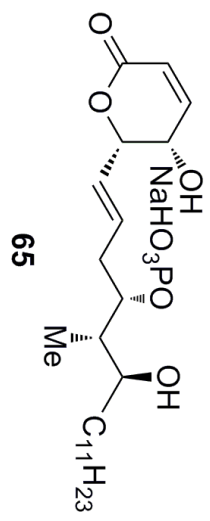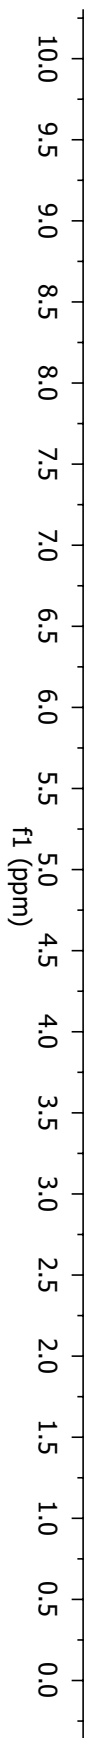

Solvent CD3OD  
Spectrometer Frequency 150.90  
Nucleus <sup>13</sup>C

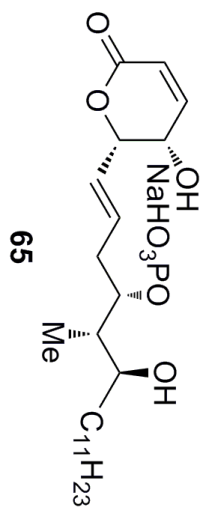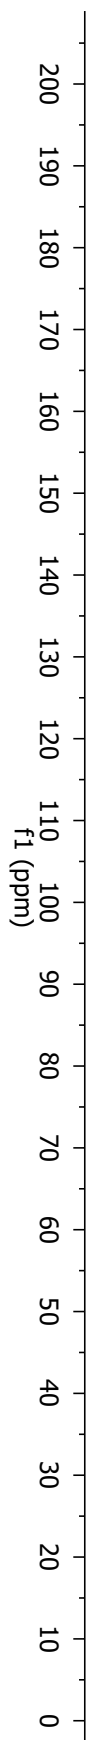

Solvent CD3OD  
Spectrometer Frequency 161.97  
Nucleus 31P

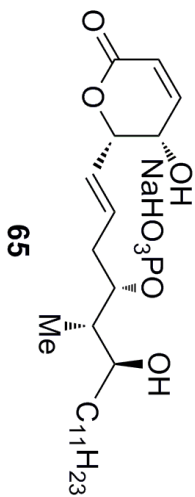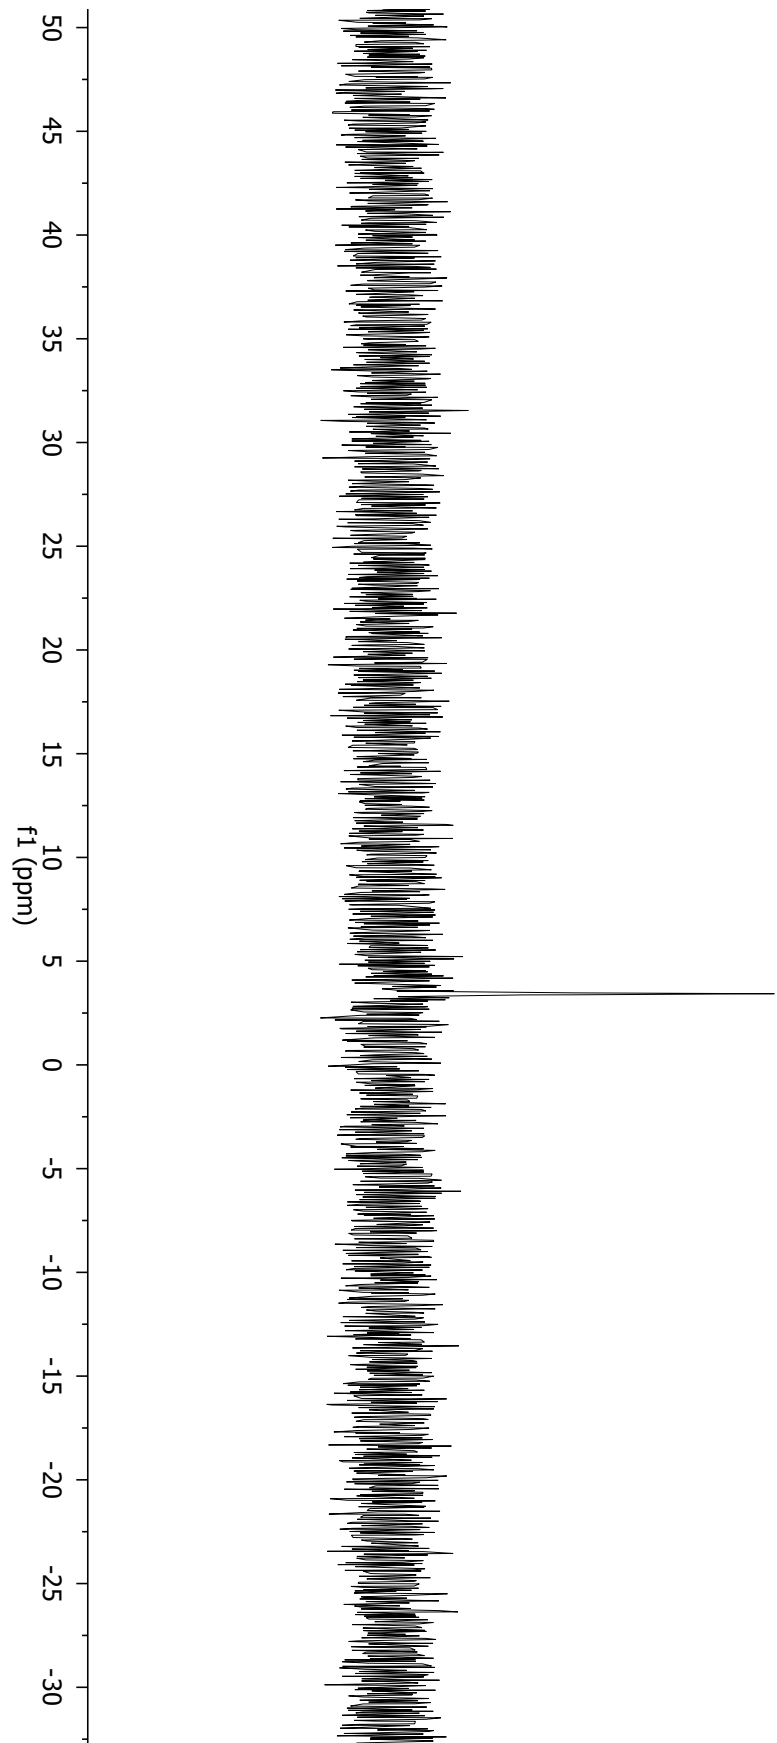

Supplement: NIHMS225945-supplement-1_si_001.pdf [file NIHMS225945-supplement-1_si_001.pdf]
